# Supplementary material for: Synthesis of sulfonyl 2-aryl-5-methylenyltetrahydropyrans
Source: Royal Society of Chemistry journal article supplement (doi:10.1039/d3ra06370d), 2023-01-01
Supplement: d3ra06370d1.pdf [file d3ra06370d1.pdf]

# Supporting Information

## Synthesis of Sulfonyl 2-Aryl-5-methylenetetrahydropyrans

Meng-Yang Chang<sup>\*a,b,c</sup> and Kuan-Ting Chen<sup>a</sup>

<sup>a</sup>Department of Medicinal and Applied Chemistry, Kaohsiung Medical University, Kaohsiung 807, Taiwan <sup>b</sup>Department of Medical Research, Kaohsiung Medical University Hospital, Kaohsiung 807, Taiwan <sup>c</sup>NPUST College of Professional Studies, National Pingtung University of Science and Technology, Pingtung 912, Taiwan.

\*Corresponding author, email: [mychang@kmu.edu.tw](mailto:mychang@kmu.edu.tw)

### Table of Contents

|    |                                                                                                                                 |         |
|----|---------------------------------------------------------------------------------------------------------------------------------|---------|
| 1. | <sup>1</sup> H NMR and <sup>13</sup> C NMR spectra copies of compounds <b>5a-5n</b> , <b>5q-5t</b> , <b>5u-1</b> , <b>5v-5w</b> | S2~S43  |
| 2. | <sup>1</sup> H NMR and <sup>13</sup> C NMR spectra copies of compounds <b>7a-7e</b>                                             | S44~S53 |
| 3. | <sup>1</sup> H NMR and <sup>13</sup> C NMR spectra copies of compounds <b>8</b> , <b>9</b> , <b>11</b> , <b>12</b>              | S54~S61 |
| 4. | X-ray crystal data of compounds <b>5m</b> and <b>5n</b>                                                                         | S62~S65 |

# Compound 5a (<sup>1</sup>H-NMR spectral data)

KT0501NB

Pulse Sequence: s2pu1  
 UNITYplus-400 "unity400"  
 Date: Jun 2 2020  
 Solvent: CDCl<sub>3</sub>  
 Ambient temperature  
 Total 32 repetitions

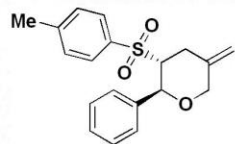

(<sup>1</sup>H NMR, 400 MHz, CDCl<sub>3</sub>)

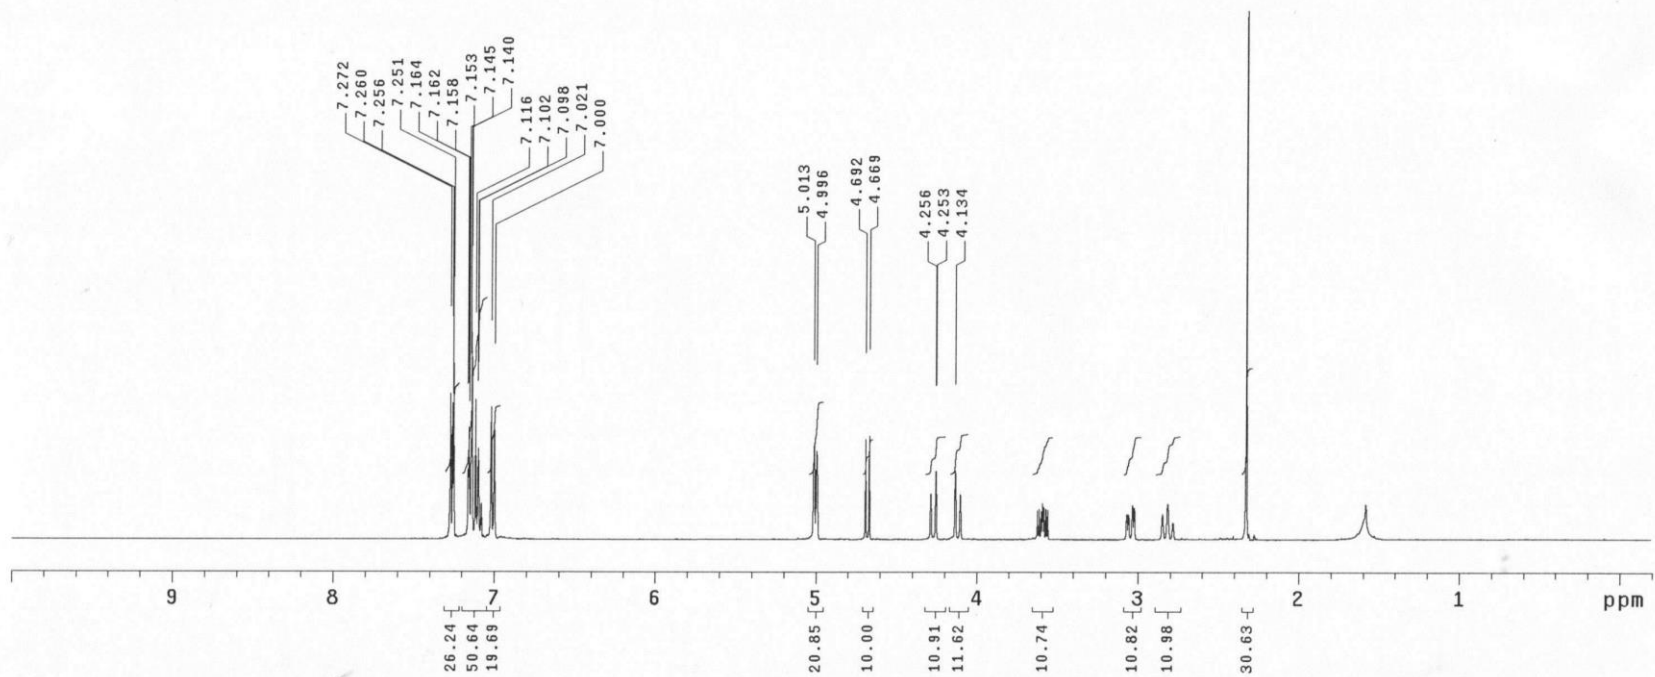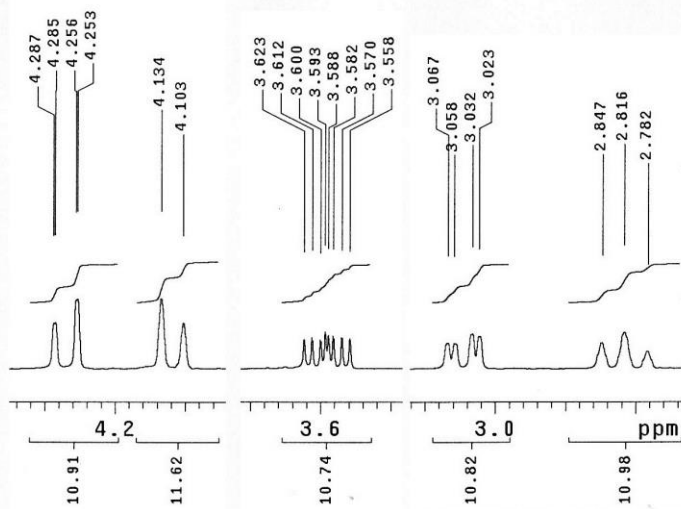

# Compound 5a (<sup>13</sup>C-NMR spectral data)

KT0501NB

Pulse Sequence: s2pu1  
UNITYplus-400 "unity400"  
Date: Jun 2 2020  
Solvent: CDCl<sub>3</sub>  
Ambient temperature  
Total 2224 repetitions

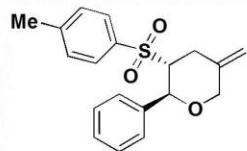

(<sup>13</sup>C NMR, 100 MHz, CDCl<sub>3</sub>)

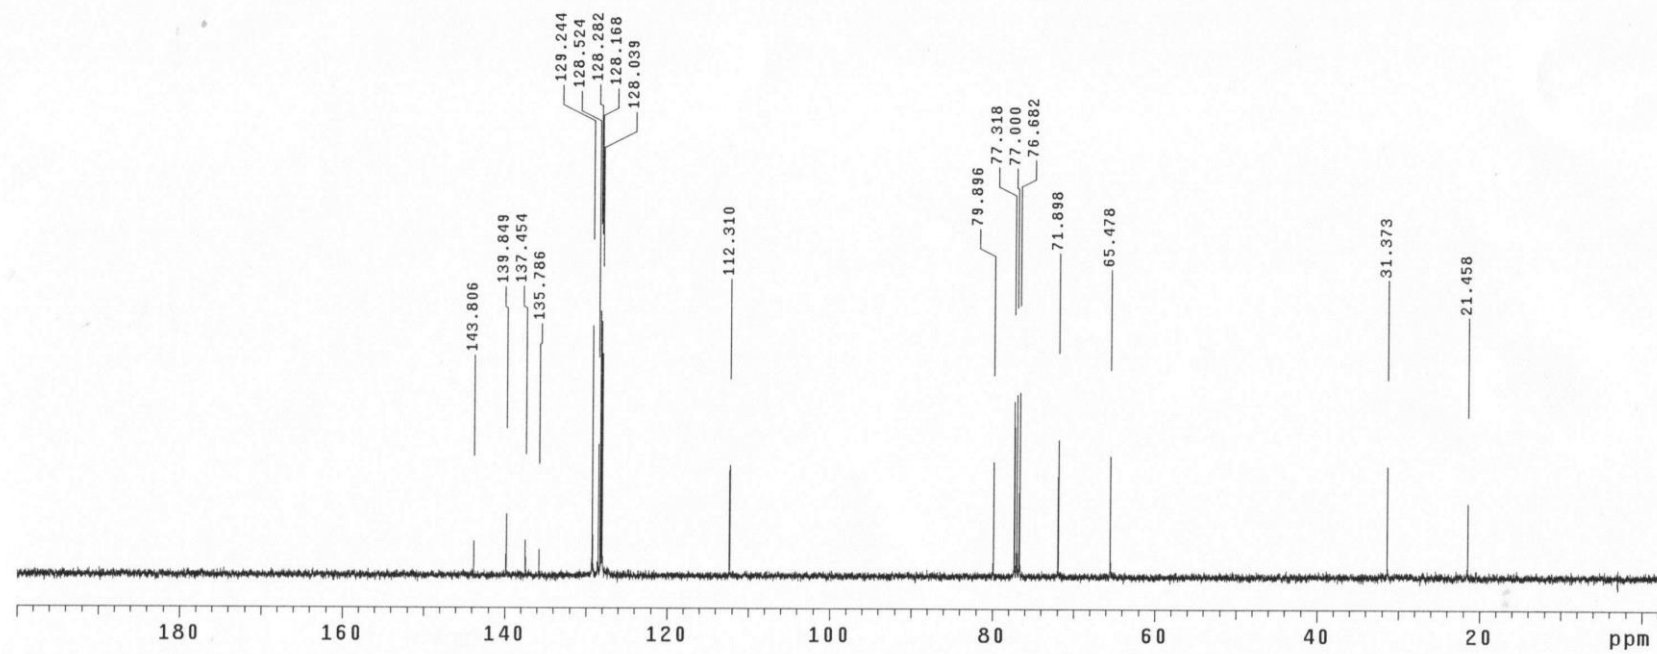

# Compound 5b (<sup>1</sup>H-NMR spectral data)

KT0514NB

Pulse Sequence: s2pu1

UNITYplus-600 "KMU600.kmu.edu.tw"

Date: Jun 18 2020

Solvent: cdc13

Temp: 28.0 C / 301.1 K

Total 32 repetitions

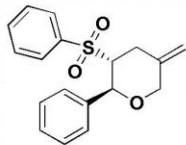

(<sup>1</sup>H NMR, 600 MHz, CDCl<sub>3</sub>)

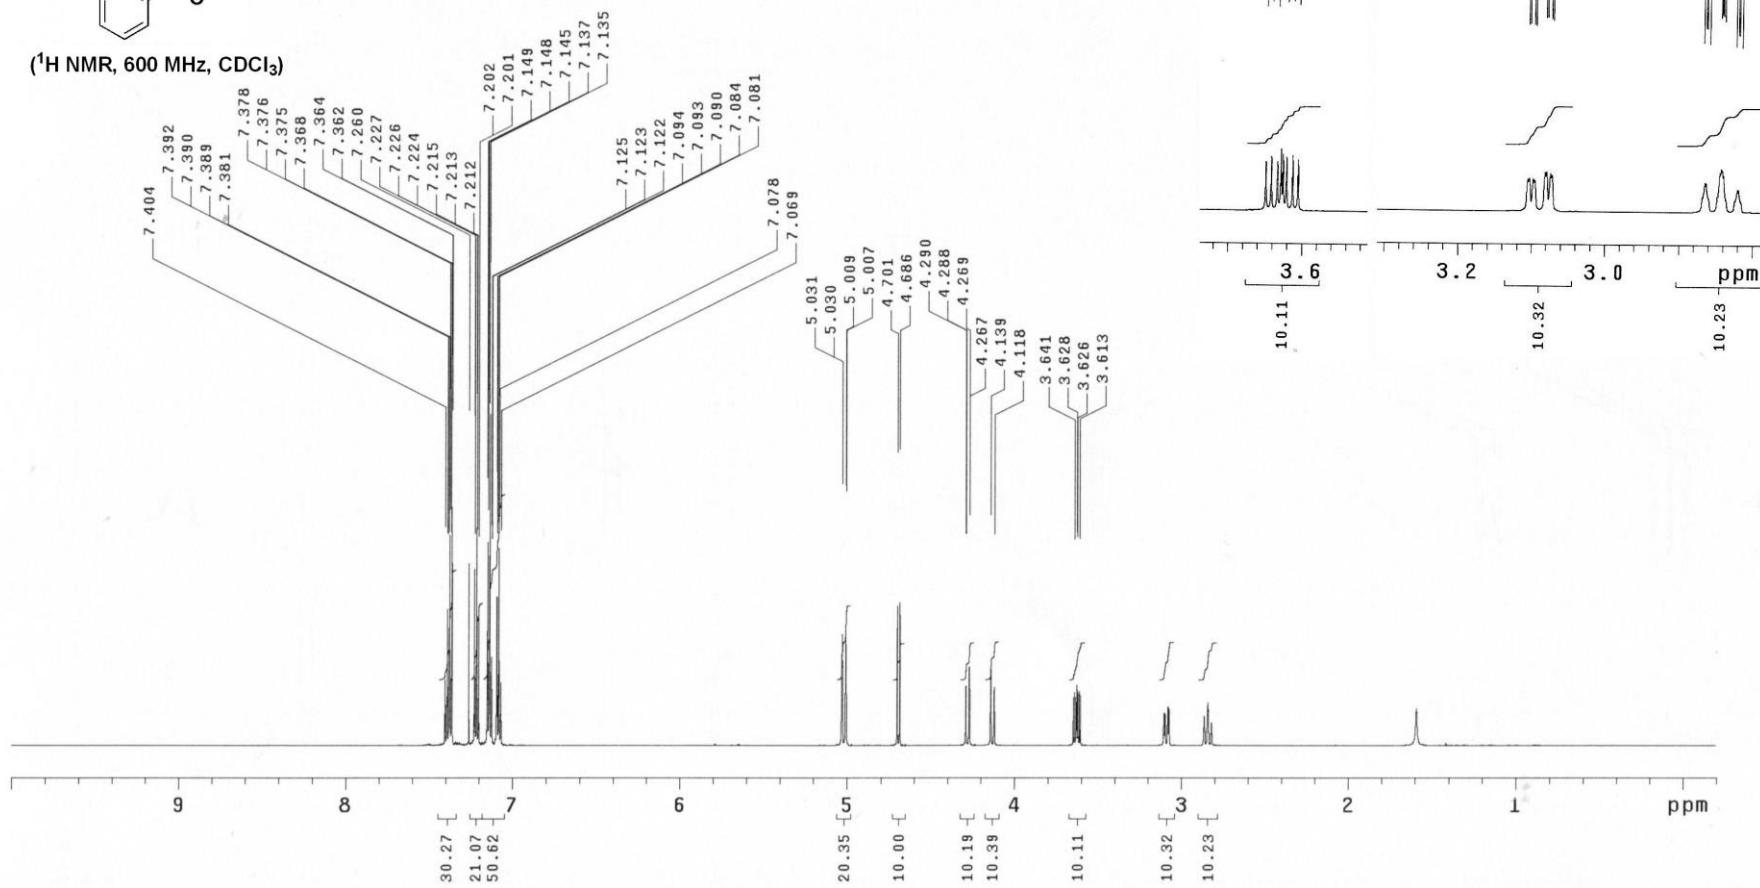

# Compound 5b (<sup>13</sup>C-NMR spectral data)

KT0514NB

Pulse Sequence: s2pu1  
UNITYplus-600 "KMU600.kmu.edu.tw"  
Date: Jun 18 2020  
Solvent: cdcl3  
Temp: 28.0 C / 301.1 K  
Total 360 repetitions

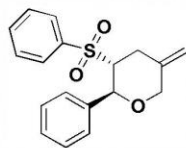

(<sup>13</sup>C NMR, 125 MHz, CDCl<sub>3</sub>)

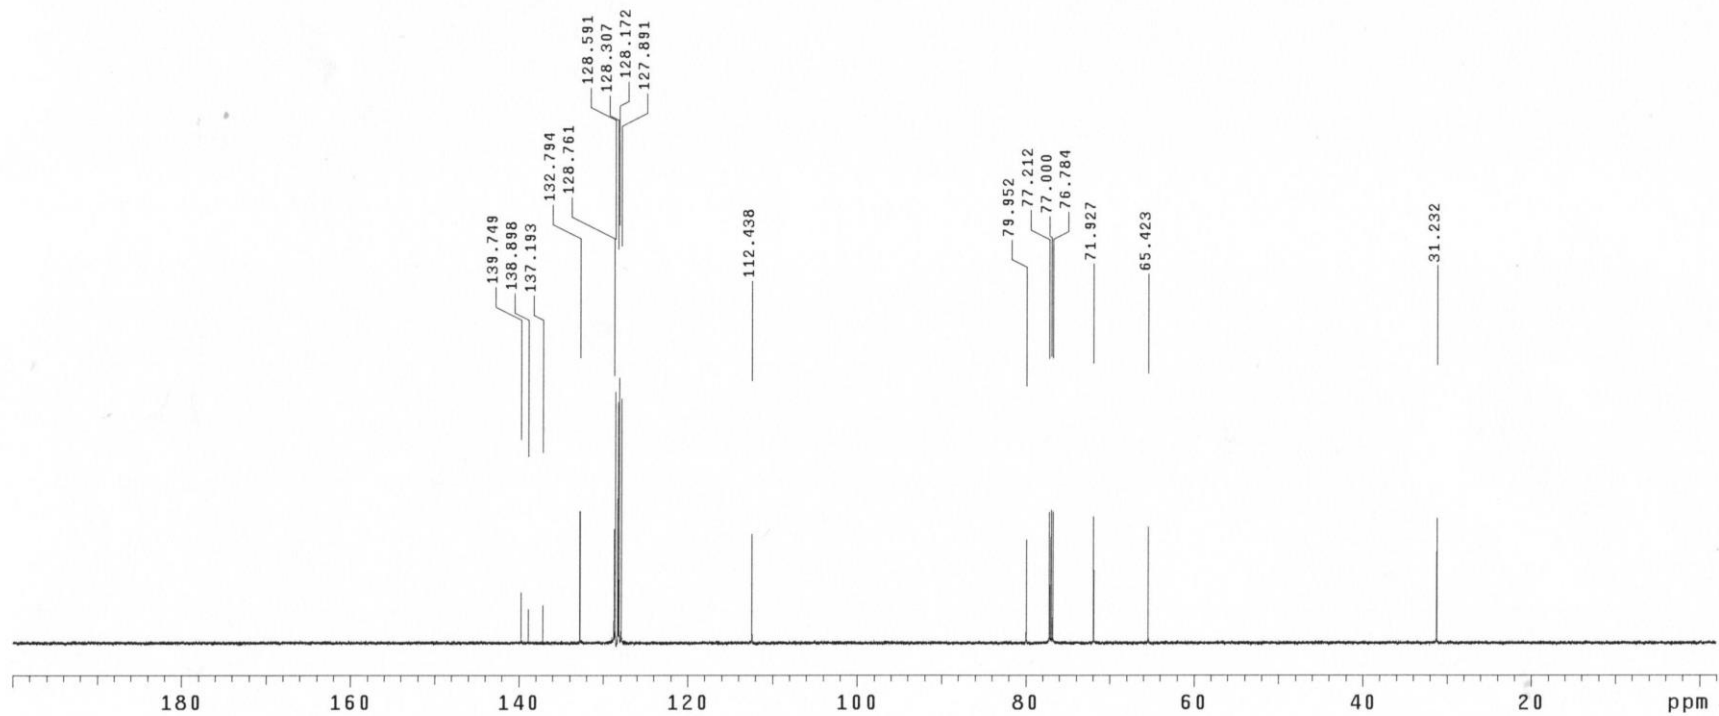

# Compound 5c (<sup>1</sup>H-NMR spectral data)

KT0515NB

Pulse Sequence: s2pu1

UNITYplus-400 "unity400"

Date: Jul 22 2020

Solvent: CDCl<sub>3</sub>

Ambient temperature

Total 32 repetitions

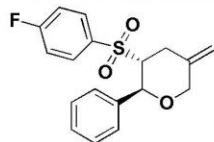

(<sup>1</sup>H NMR, 400 MHz, CDCl<sub>3</sub>)

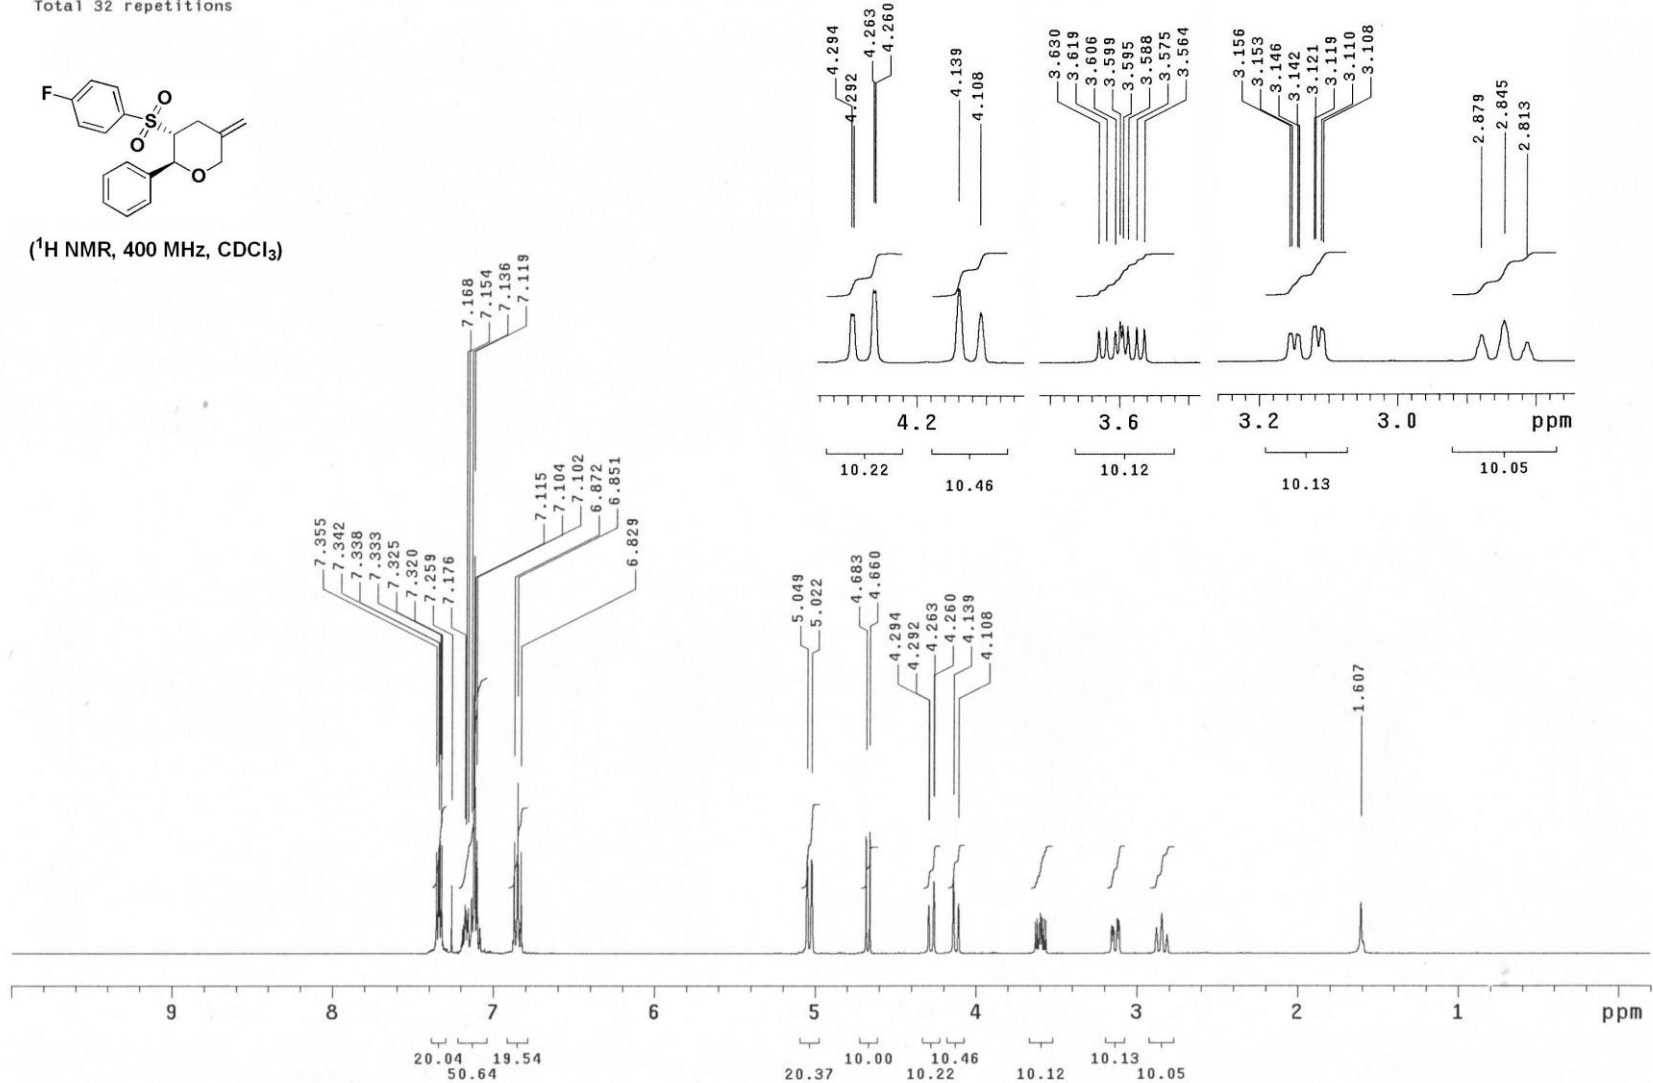

# Compound 5c (<sup>13</sup>C-NMR spectral data)

KT0515NB

Pulse Sequence: s2pu1

UNITYplus-400 "unity400"

Date: Jul 22 2020

Solvent: CDCl<sub>3</sub>

Ambient temperature

Total 1040 repetitions

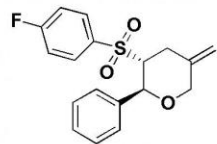

(<sup>13</sup>C NMR, 100 MHz, CDCl<sub>3</sub>)

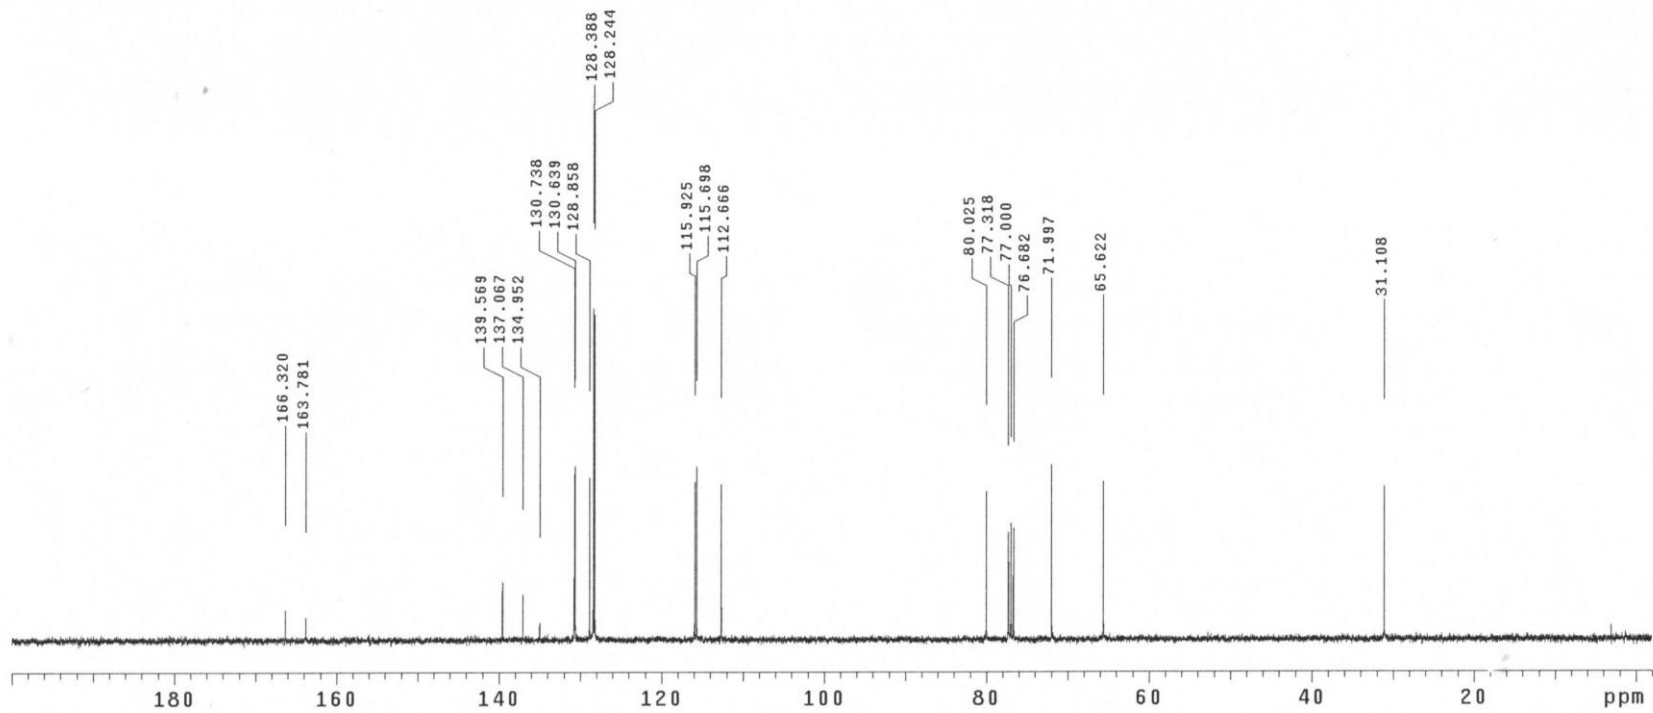

# Compound 5d (<sup>1</sup>H-NMR spectral data)

KT0806NB

Pulse Sequence: s2pu1  
 UNITYplus-400 "unity400"  
 Date: Sep 30 2020  
 Solvent: CDCl<sub>3</sub>  
 Ambient temperature  
 Total 64 repetitions

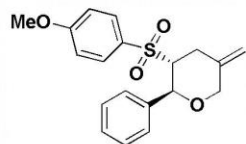

(<sup>1</sup>H NMR, 400 MHz, CDCl<sub>3</sub>)

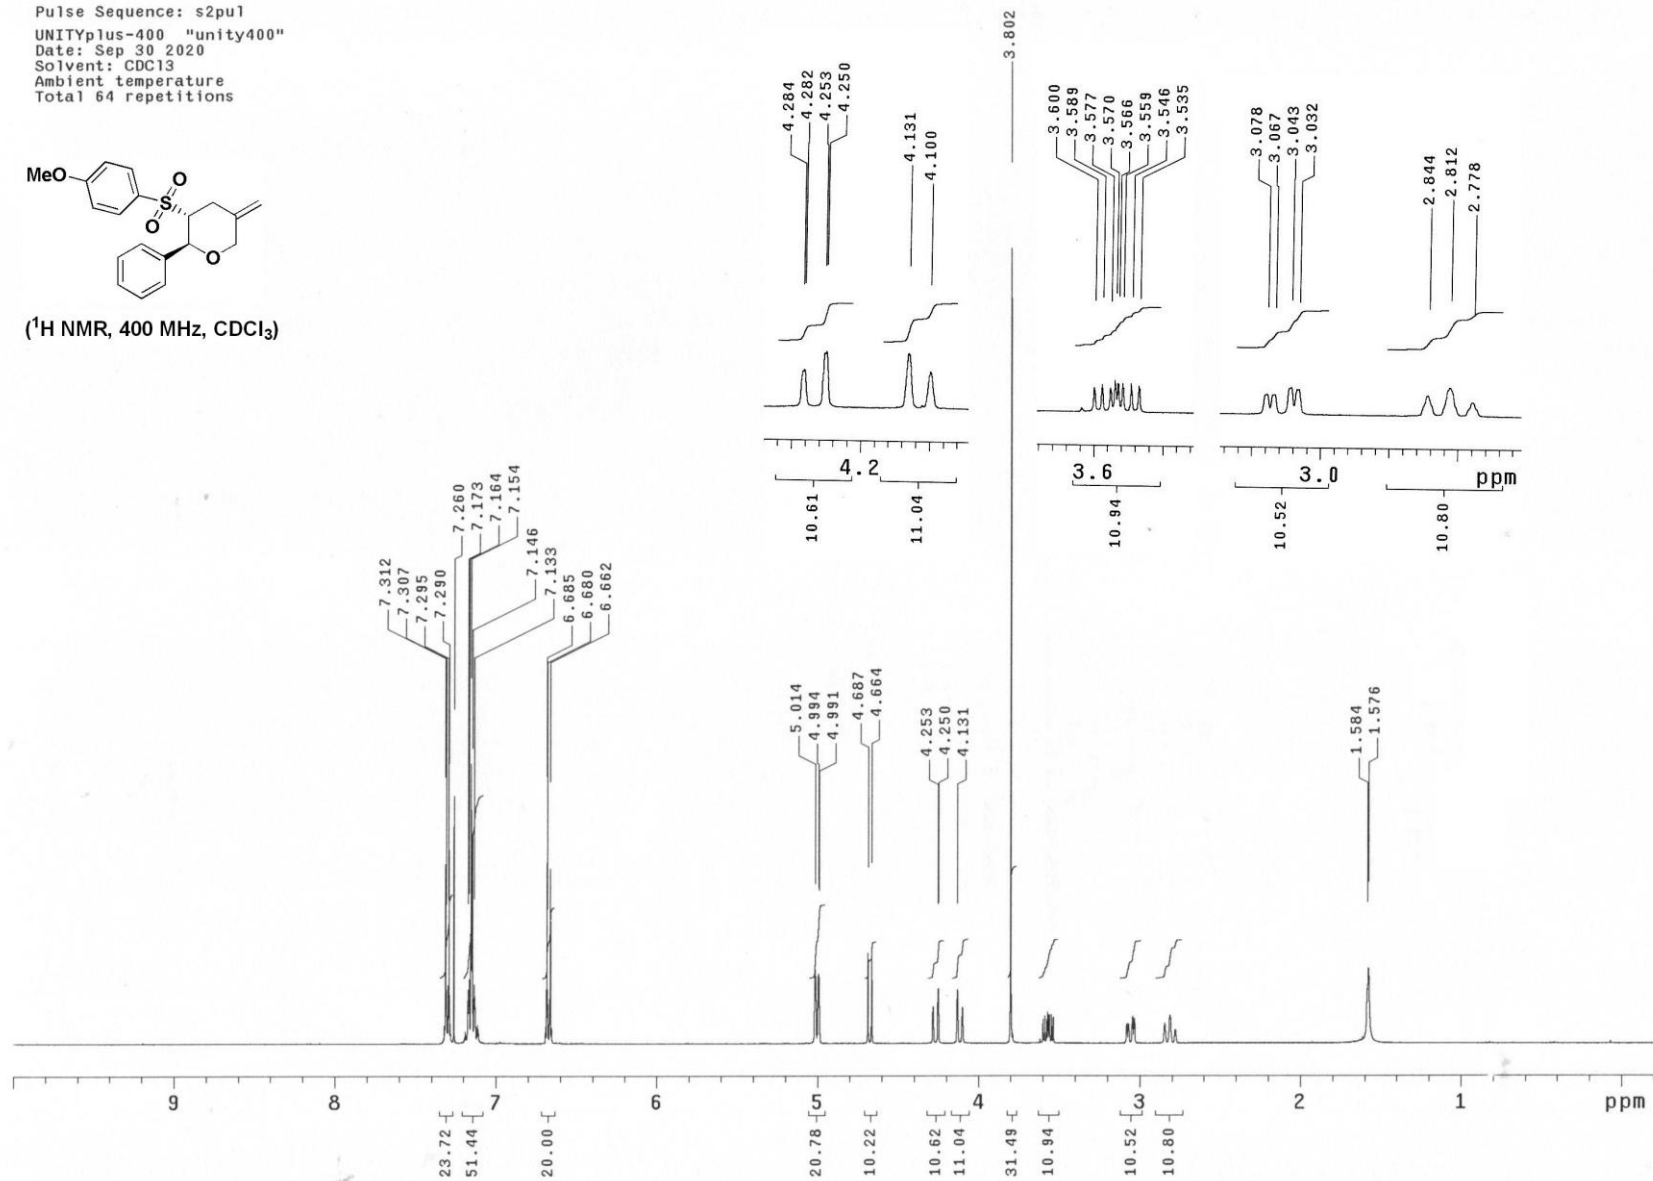



# Compound 5d (<sup>13</sup>C-NMR spectral data)

KT0806NB

Pulse Sequence: s2pu1

UNITYplus-400 "unity400"

Date: Sep 30 2020

Solvent: CDCl<sub>3</sub>

Ambient temperature

Total 5584 repetitions

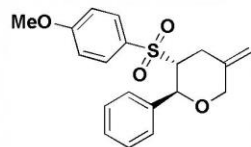

(<sup>13</sup>C NMR, 100 MHz, CDCl<sub>3</sub>)

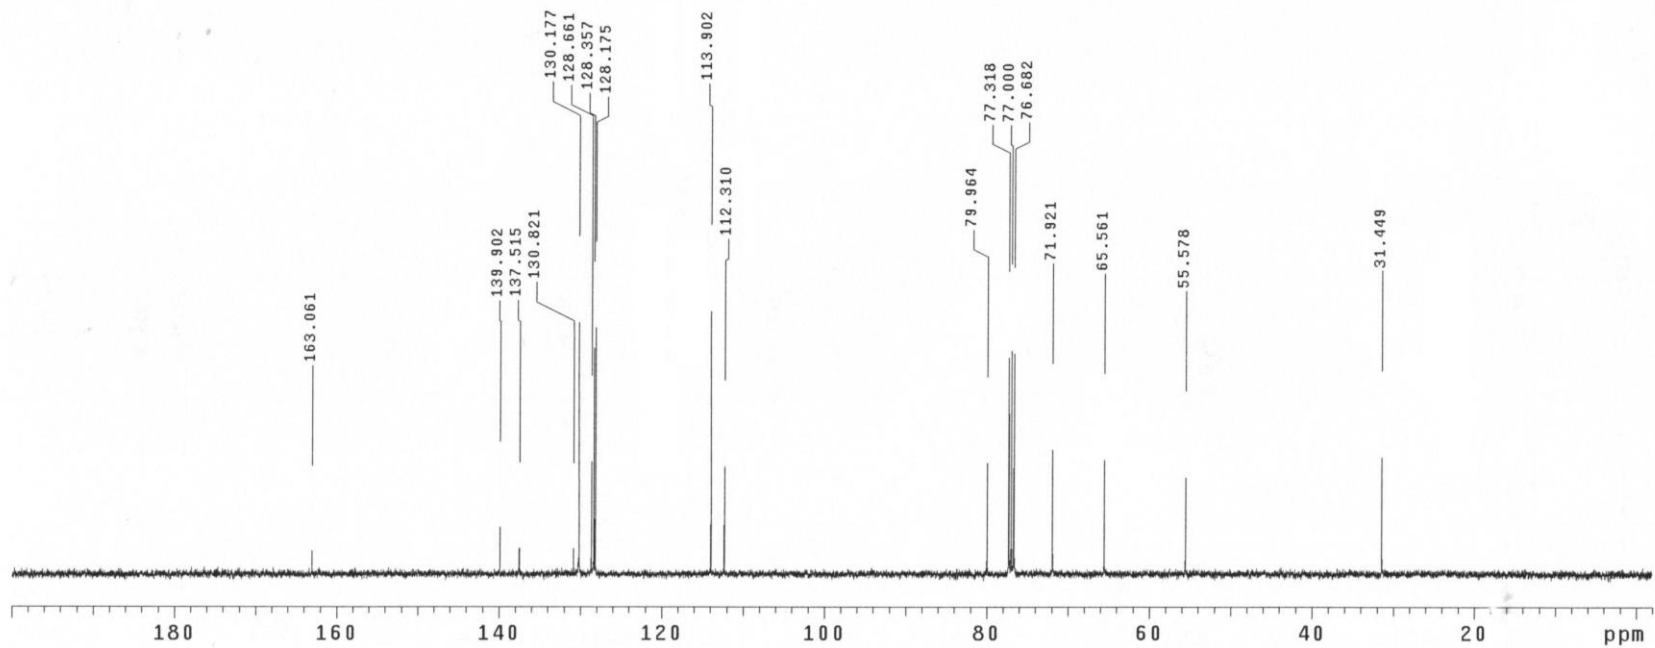

# Compound 5e (<sup>1</sup>H-NMR spectral data)

KT0619NB

Pulse Sequence: s2pu1

Solvent: CDC13

Ambient temperature

UNITYplus-400 "unity400"

Pulse 38.8 degrees

Acq. time 3.744 sec

Width 6000.6 Hz

32 repetitions

OBSERVE H1, 400.2743814 MHz

DATA PROCESSING

FT size 65536

Total time 2 min, 0 sec

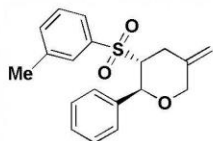

(<sup>1</sup>H NMR, 400 MHz, CDCl<sub>3</sub>)

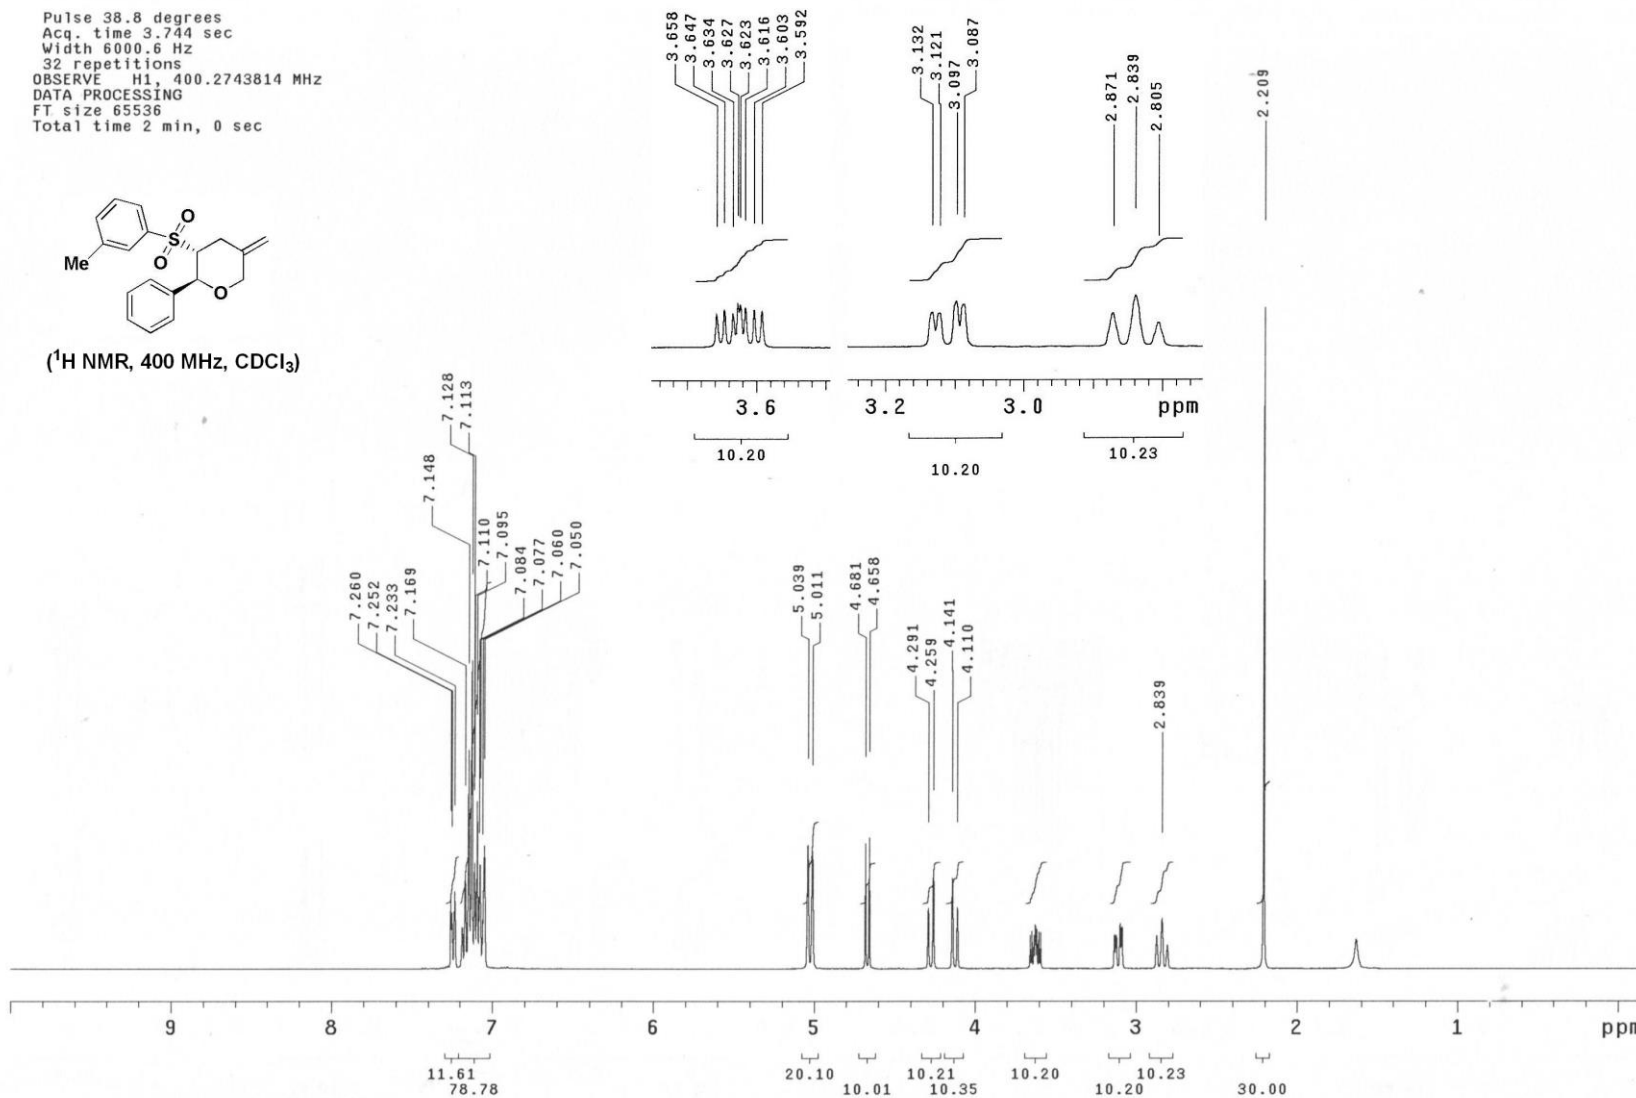

# Compound 5e (<sup>13</sup>C-NMR spectral data)

KT0619NB

Pulse Sequence: s2pu1

Solvent: CDCl<sub>3</sub>

Ambient temperature

UNITYplus-400 "unity400"

Relax. delay 0.500 sec

Pulse 65.8 degrees

Acq. time 0.800 sec

Width 25000.0 Hz

1216 repetitions

OBSERVE C13, 100.6490769 MHz

DECOUPLE H1, 400.2763980 MHz

Power 43 dB

on during acquisition

off during delay

WALTZ-16 modulated

DATA PROCESSING

Line broadening 1.0 Hz

FT size 65536

Total time 11 hr, 39 min, 7 sec

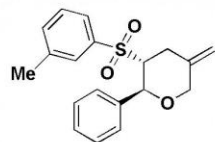

(<sup>13</sup>C NMR, 100 MHz, CDCl<sub>3</sub>)

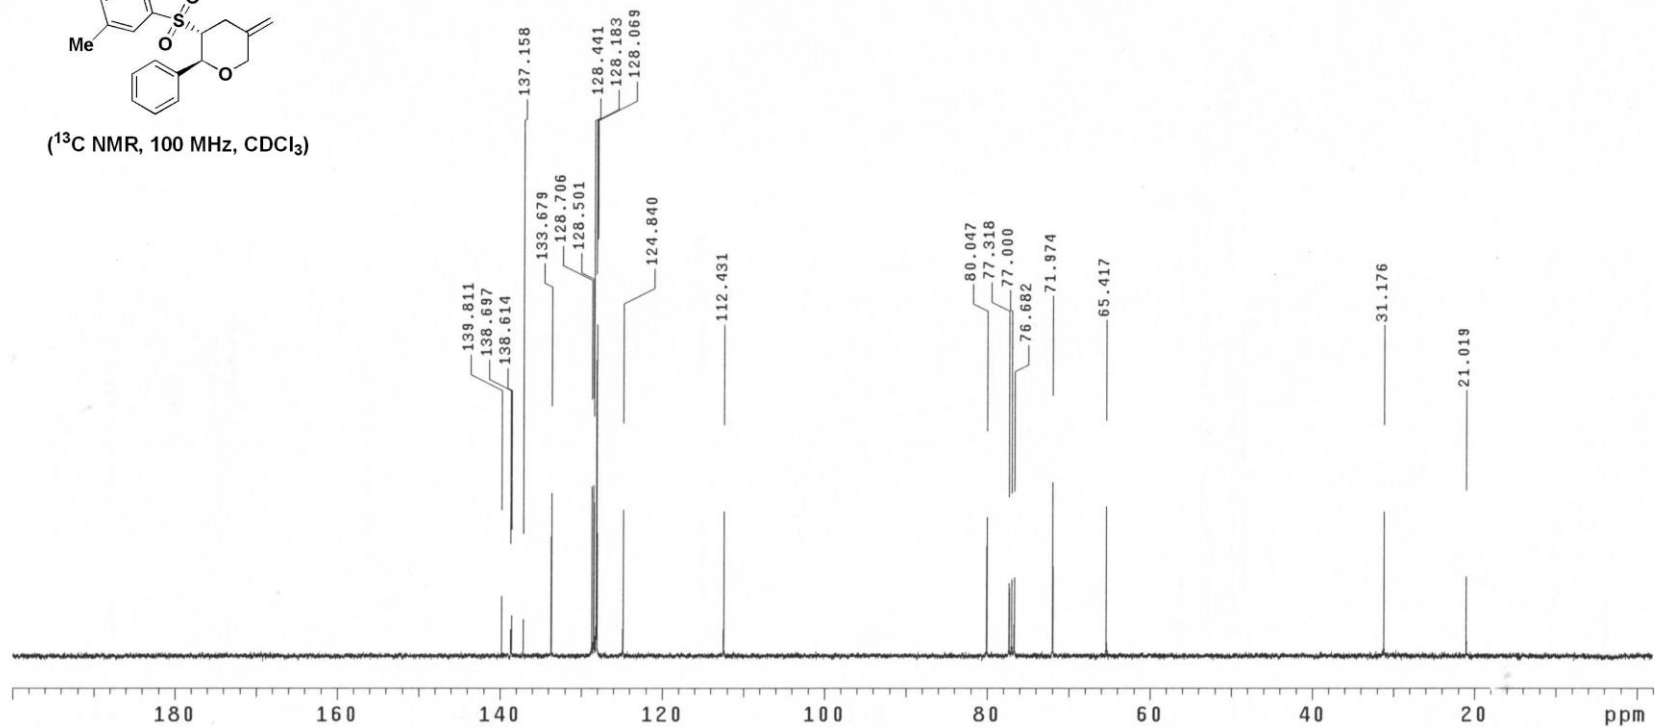

# Compound 5f (<sup>1</sup>H-NMR spectral data)

KT0527NB

Pulse Sequence: s2pu1

UNITYplus-400 "unity400"

Date: Jun 12 2020

Solvent: CDC13

Ambient temperature

Total 80 repetitions

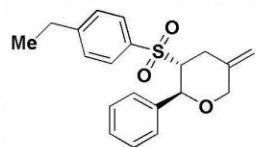

(<sup>1</sup>H NMR, 400 MHz, CDCl<sub>3</sub>)

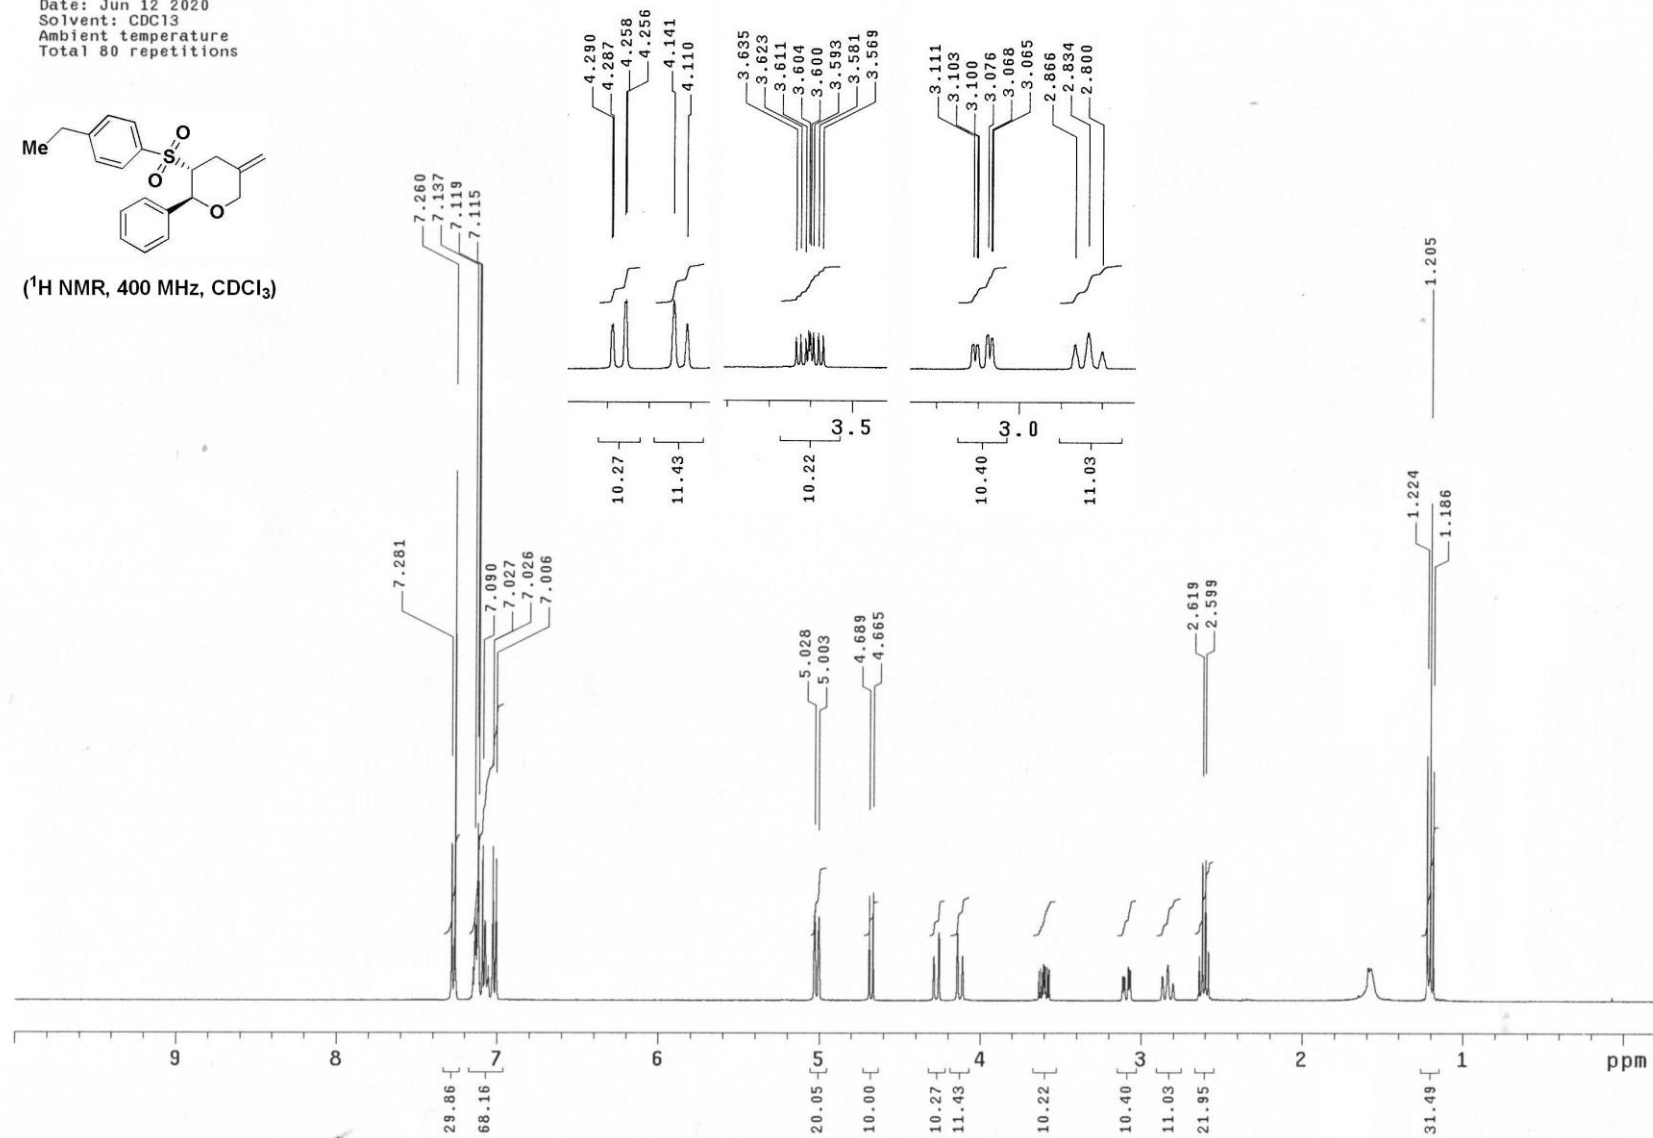

# Compound 5f (<sup>13</sup>C-NMR spectral data)

KT0527NB

Pulse Sequence: s2pu1

UNITYplus-400 "unity400"

Date: Jun 12 2020

Solvent: CDCl<sub>3</sub>

Ambient temperature

Total 32000 repetitions

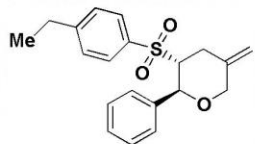

(<sup>13</sup>C NMR, 100 MHz, CDCl<sub>3</sub>)

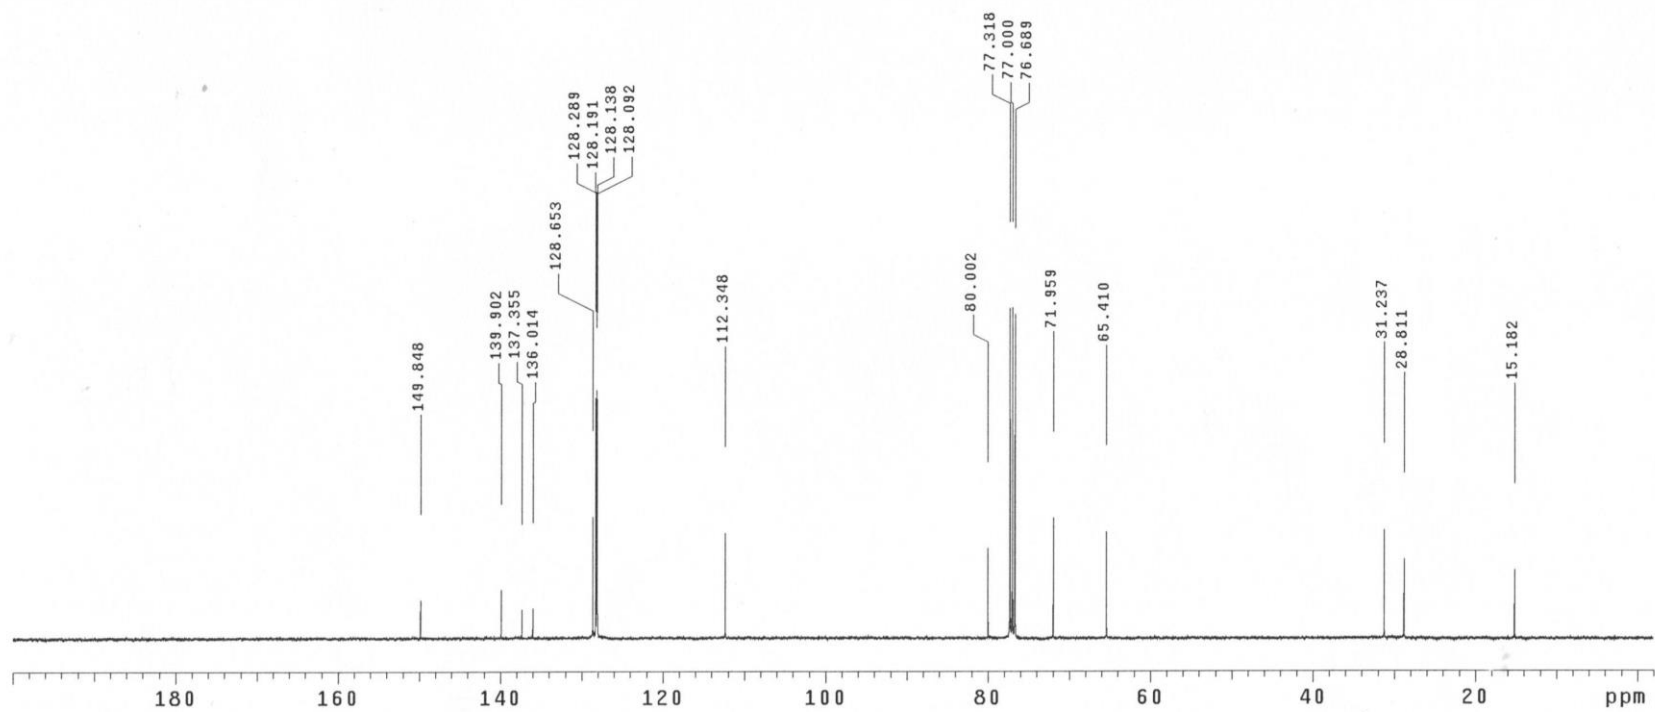

# Compound 5g (<sup>1</sup>H-NMR spectral data)

KT0602NB

Pulse Sequence: s2pu1  
 UNITYplus-400 "unity400"  
 Date: Sep 30 2020  
 Solvent: CDCl<sub>3</sub>  
 Ambient temperature  
 Total 80 repetitions

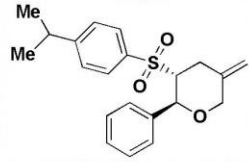

(<sup>1</sup>H NMR, 400 MHz, CDCl<sub>3</sub>)

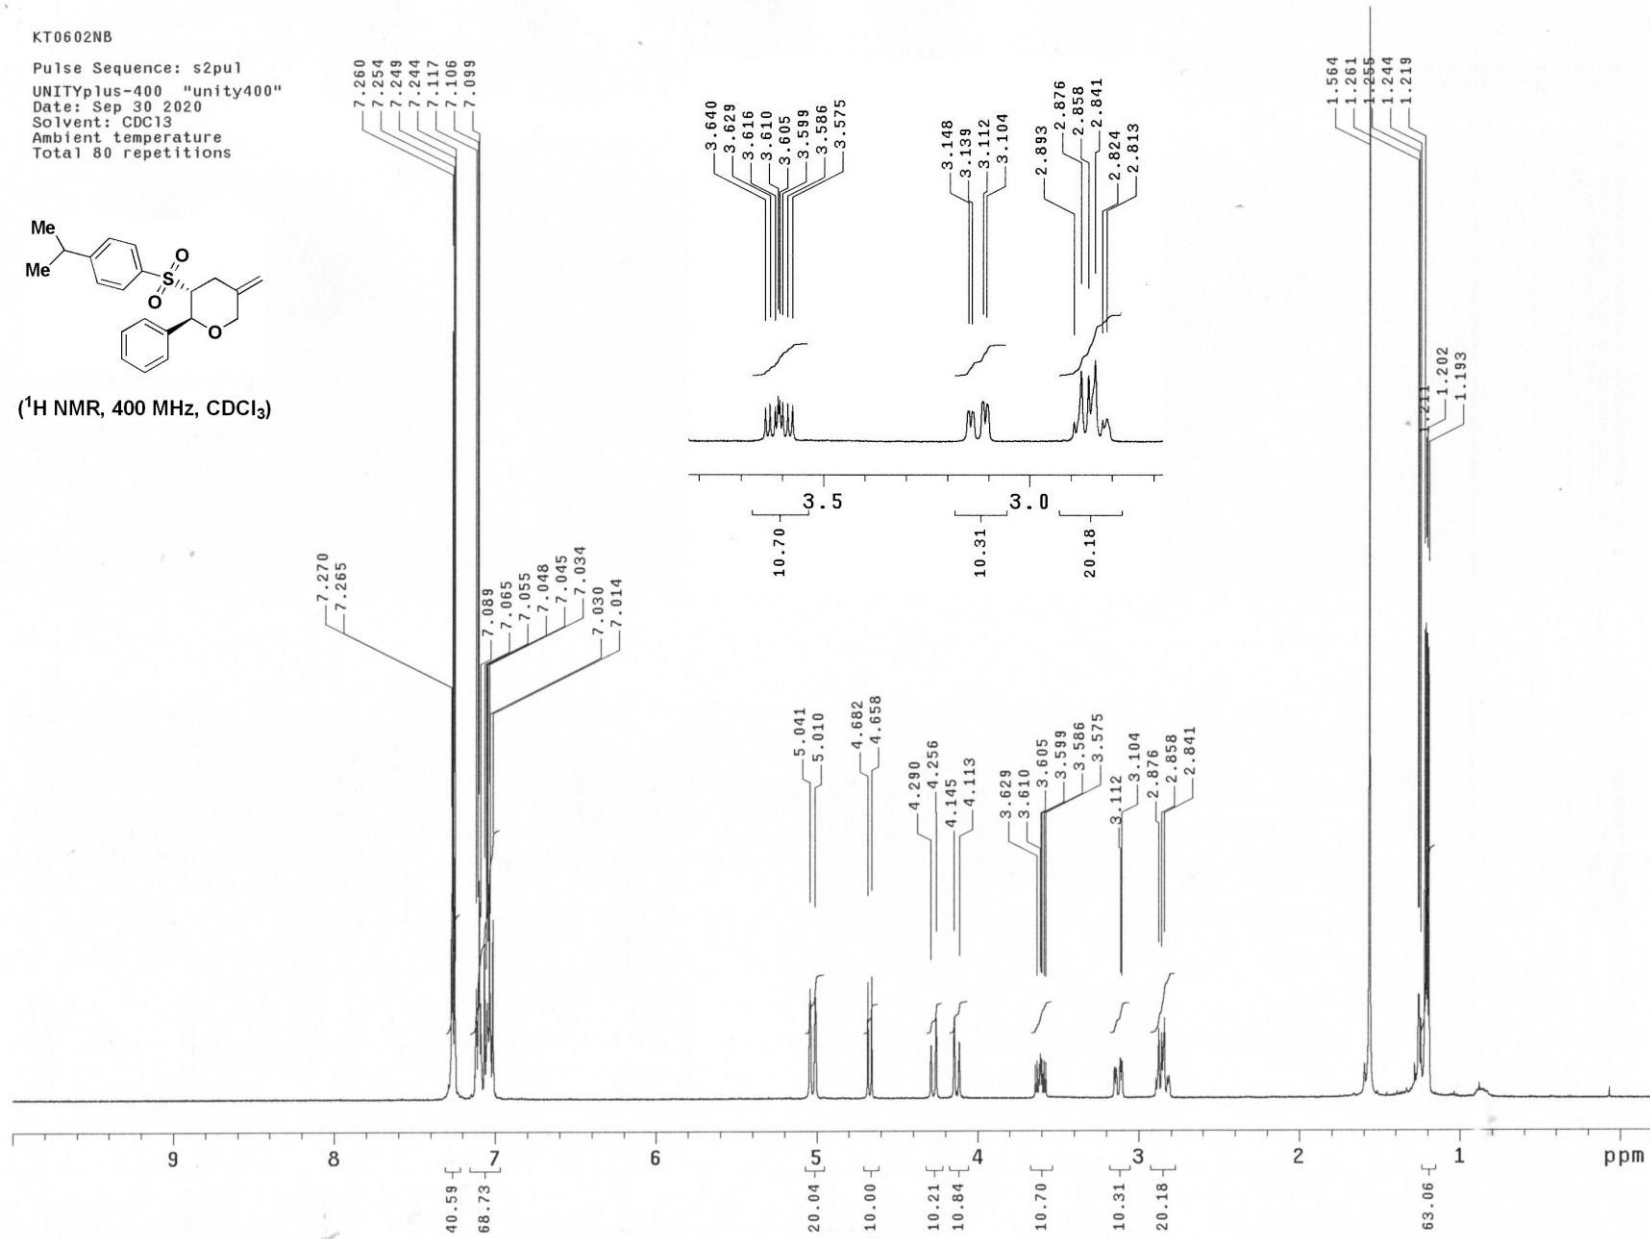

# Compound 5g (<sup>13</sup>C-NMR spectral data)

KT0602NB

Pulse Sequence: s2pu1

UNITYplus-400 "unity400"

Date: Sep 30 2020

Solvent: CDCl<sub>3</sub>

Ambient temperature

Total 9616 repetitions

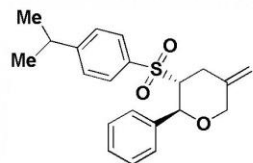

(<sup>13</sup>C NMR, 100 MHz, CDCl<sub>3</sub>)

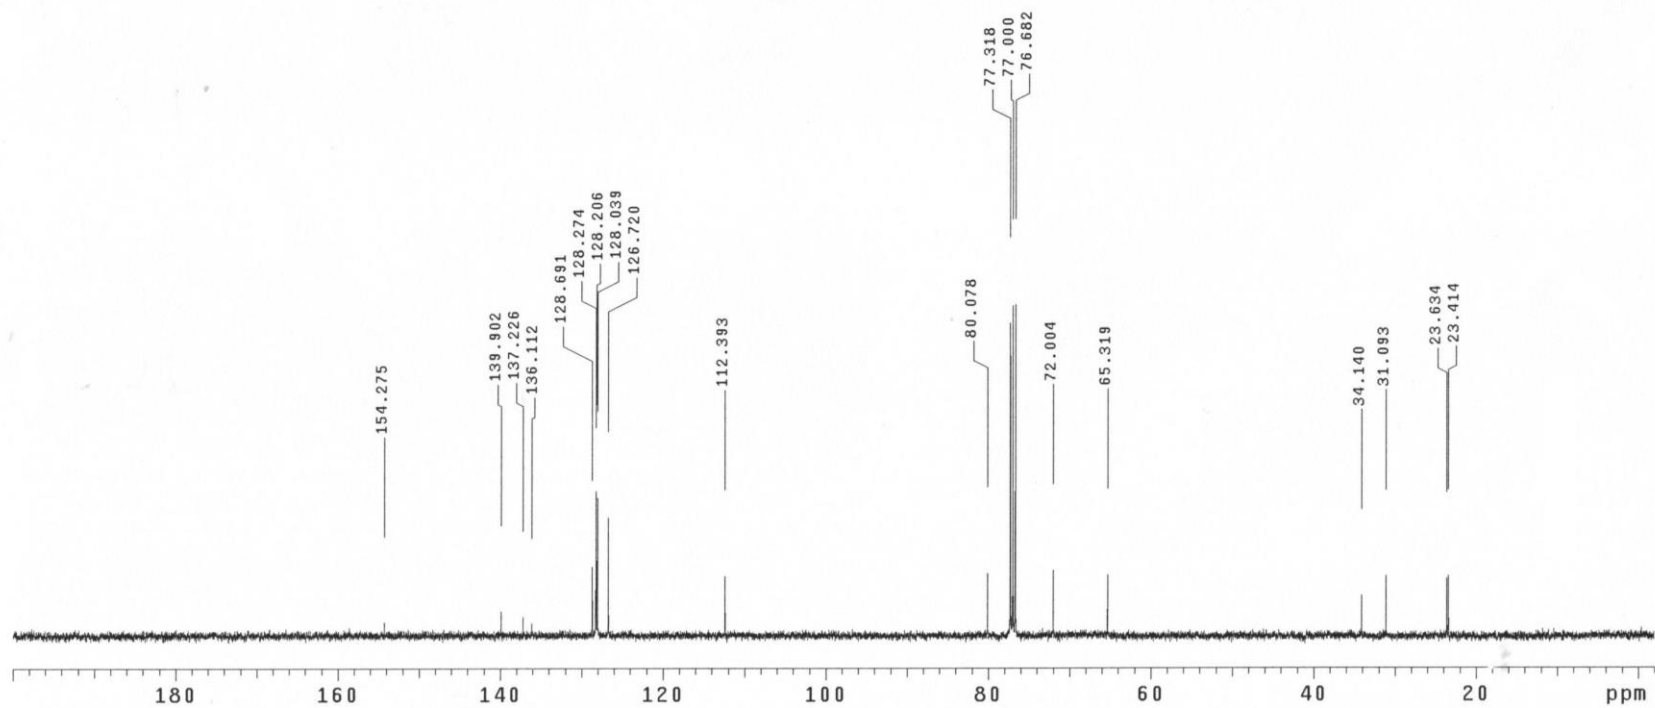

# Compound 5h (<sup>1</sup>H-NMR spectral data)

KT0522NB

Pulse Sequence: s2pu1

UNITYplus-400 "unity400"

Date: Jun 5 2020

Solvent: CDCl<sub>3</sub>

Ambient temperature

Total 32 repetitions

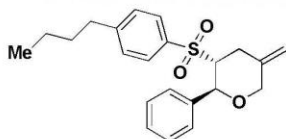

(<sup>1</sup>H NMR, 400 MHz, CDCl<sub>3</sub>)

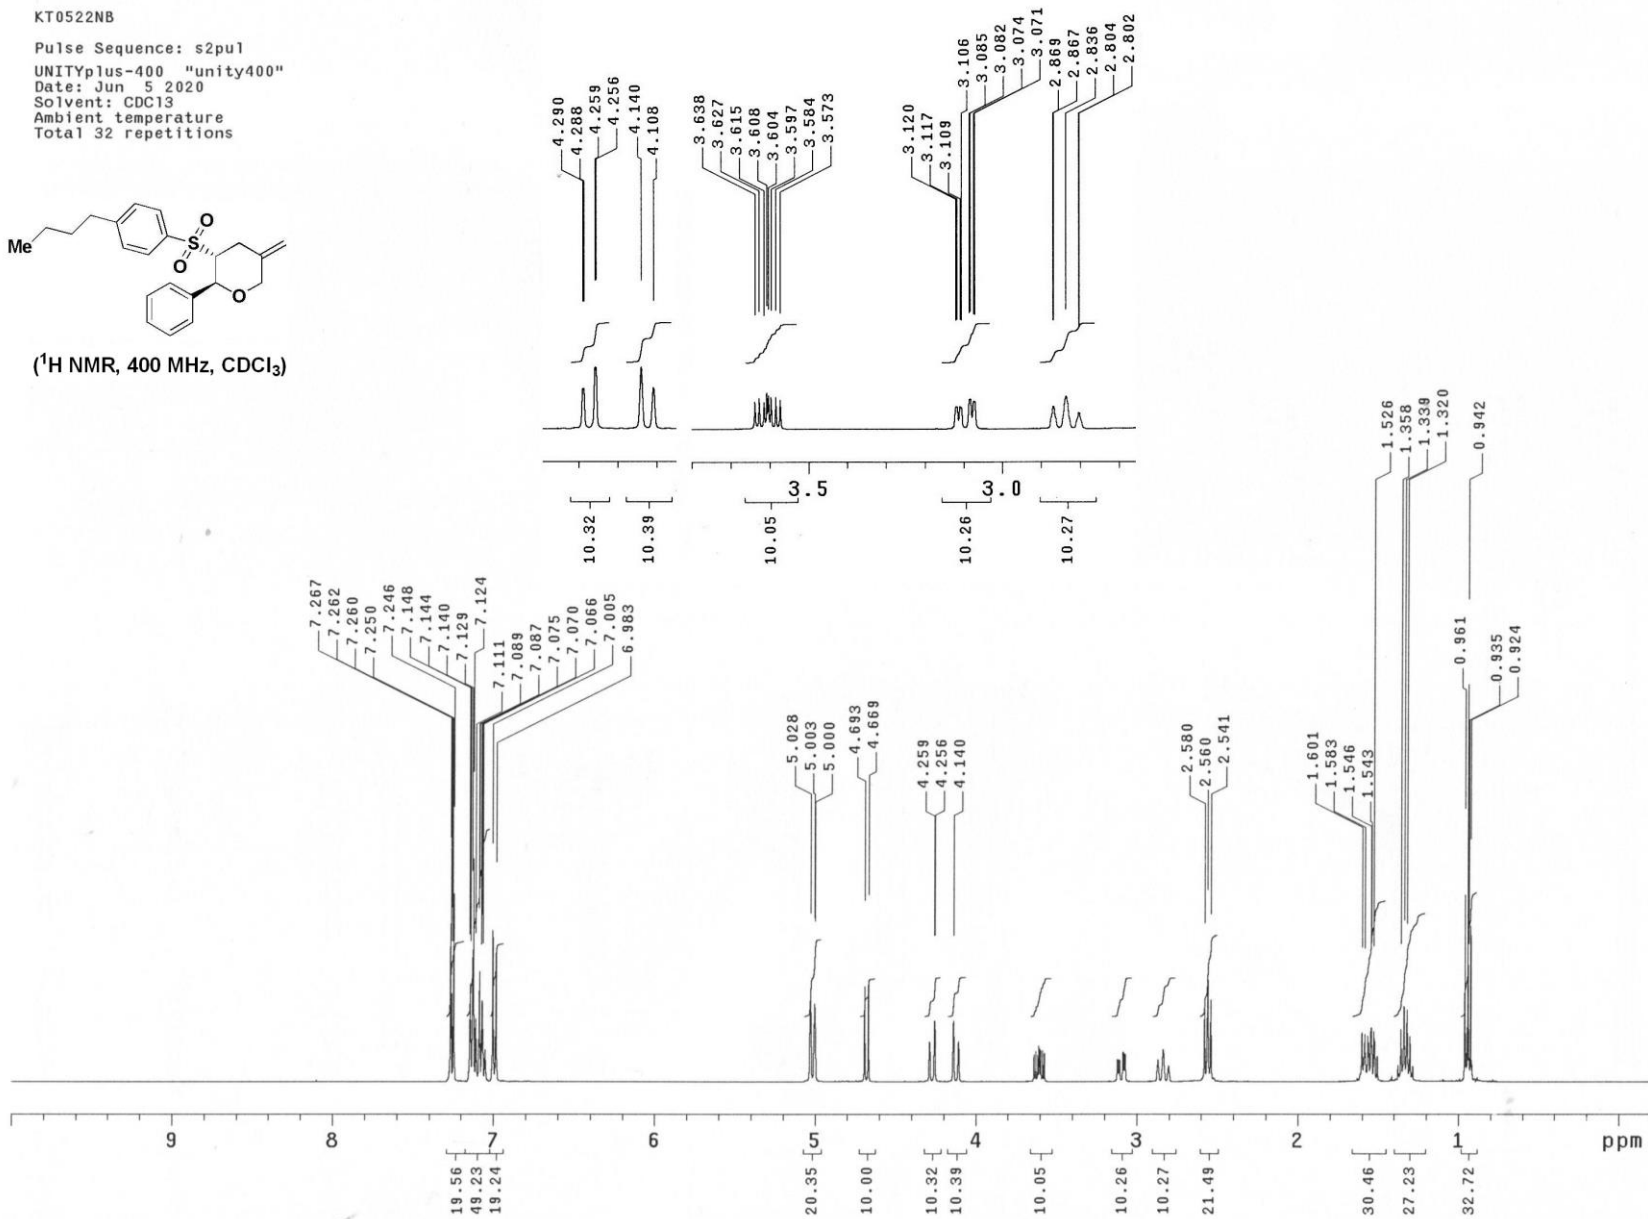



# Compound 5h (<sup>13</sup>C-NMR spectral data)

KT0522NB

Pulse Sequence: s2pu1  
UNITYplus-400 "unity400"  
Date: Jun 5 2020  
Solvent: CDC13  
Ambient temperature  
Total 640 repetitions

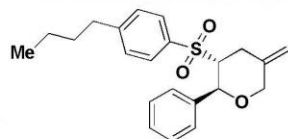

(<sup>13</sup>C NMR, 100 MHz, CDCl<sub>3</sub>)

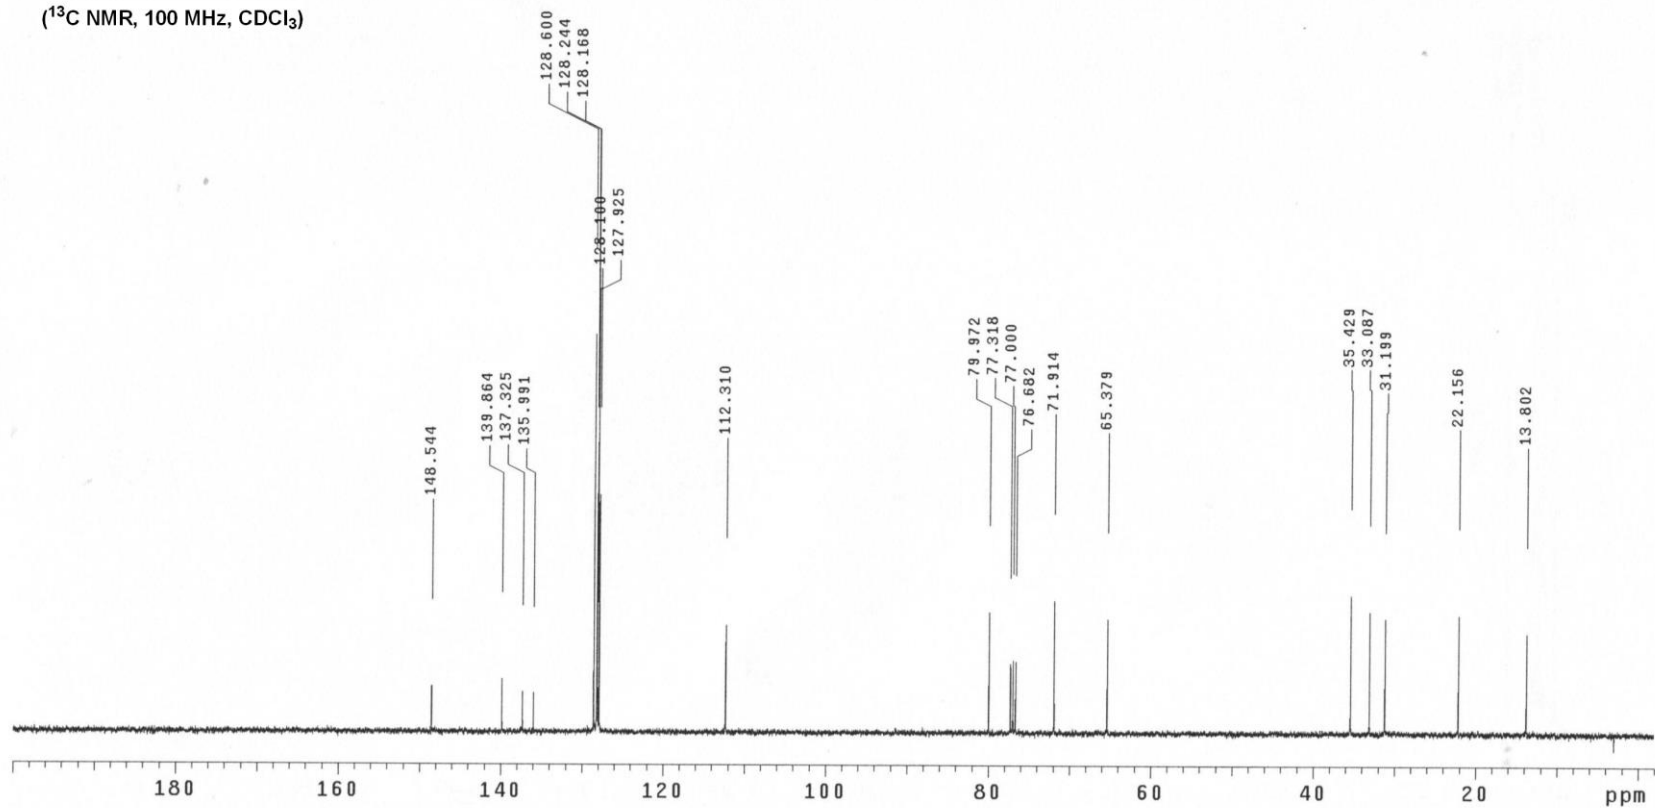

# Compound 5i (<sup>1</sup>H-NMR spectral data)

KT0702NB

Pulse Sequence: s2pu1

Solvent: CDCl<sub>3</sub>

Ambient temperature

UNITYplus-400 "unity400"

Pulse 38.8 degrees

Acq. time 3.744 sec

Width 6000.6 Hz

64 repetitions

OBSERVE H1 400.2743814 MHz

DATA PROCESSING

FT size 65536

Total time 4 min, 0 sec

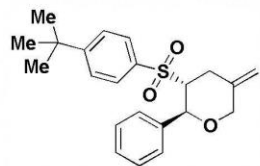

(<sup>1</sup>H NMR, 400 MHz, CDCl<sub>3</sub>)

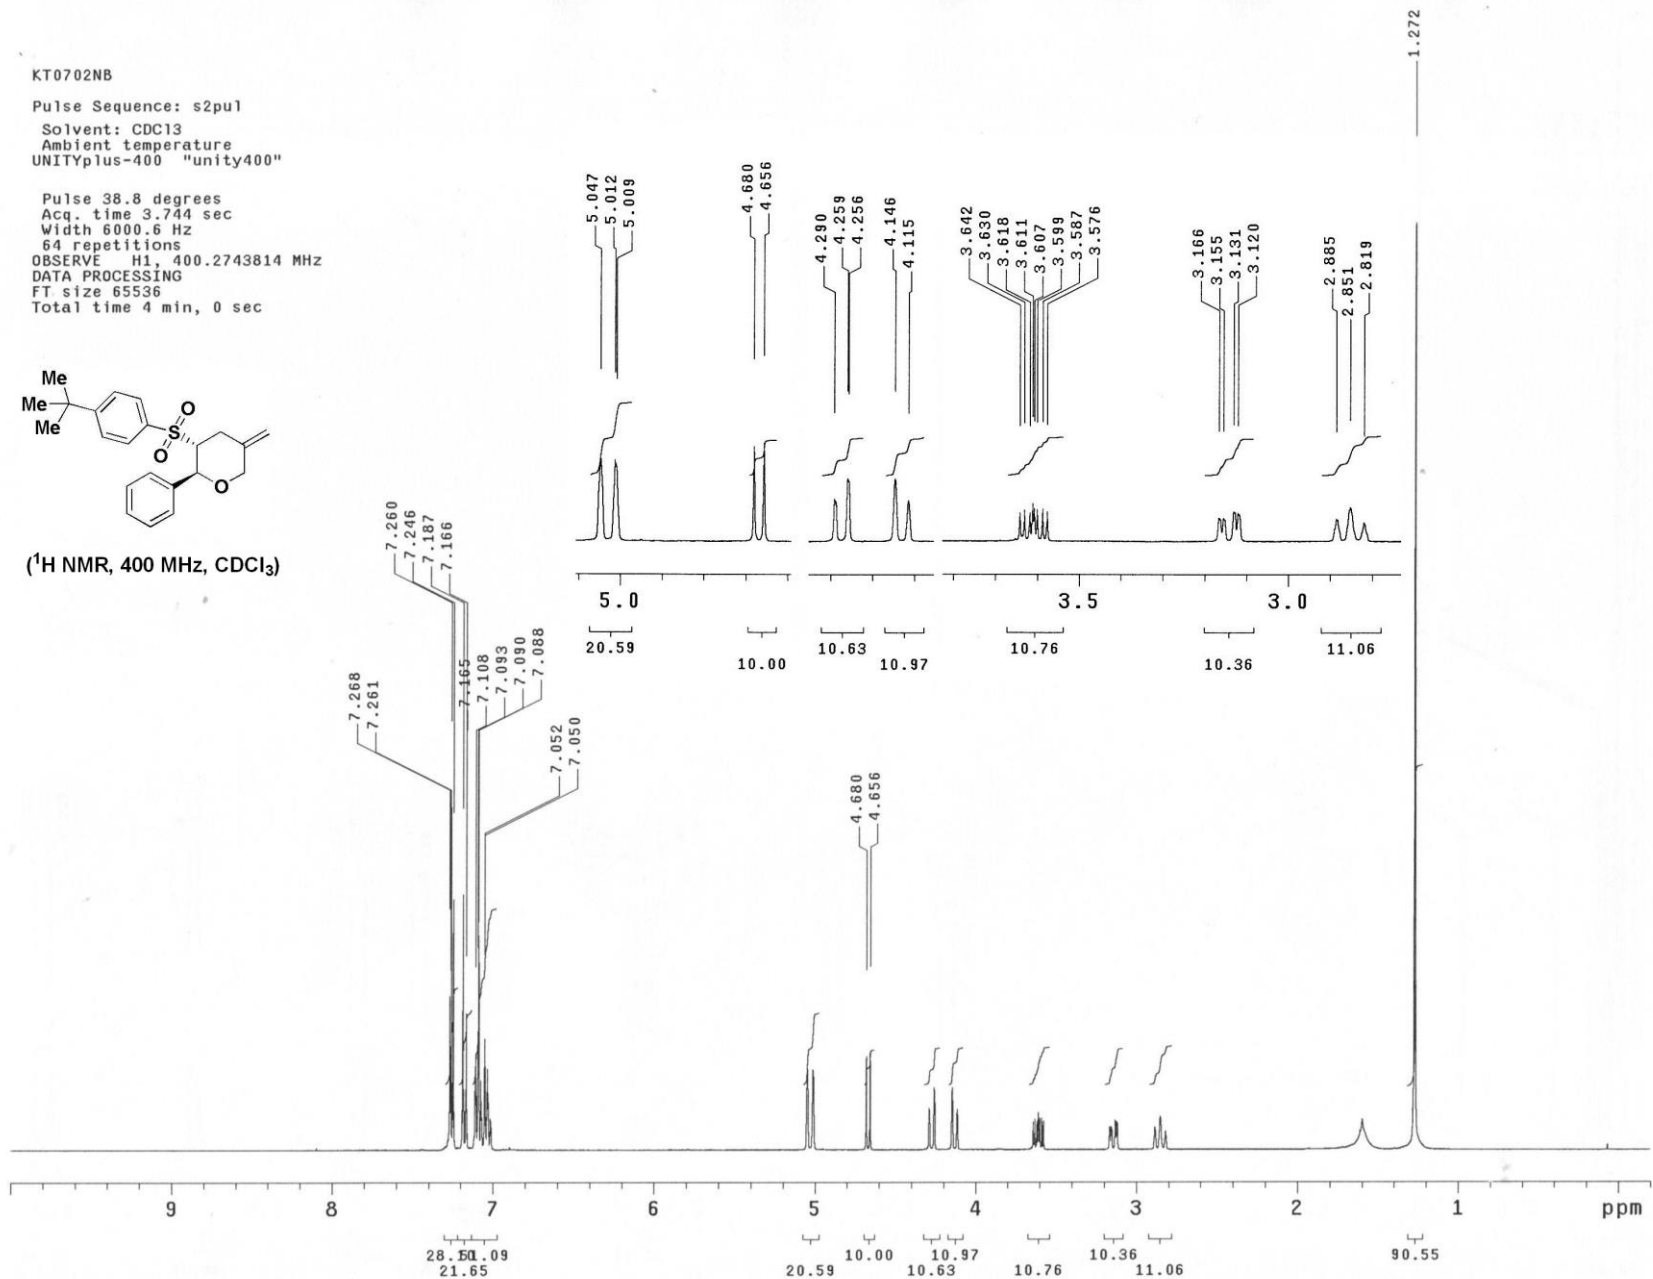

# Compound 5i (<sup>13</sup>C-NMR spectral data)

KT0702NB

Pulse Sequence: s2pu1

Solvent: CDCl<sub>3</sub>

Ambient temperature

UNITYplus-400 "unity400"

Relax. delay 0.500 sec

Pulse 65.8 degrees

Acq. time 0.800 sec

Width 25000.0 Hz

4432 repetitions

OBSERVE C13, 100.6490731 MHz

DECOUPLE H1, 400.2763980 MHz

Power 43 dB

on during acquisition

off during delay

WALTZ-16 modulated

DATA PROCESSING

Line broadening 1.0 Hz

FT size 65536

Total time 11 hr, 39 min, 7 sec

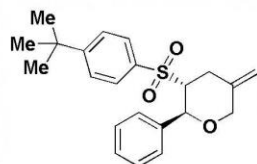

(<sup>13</sup>C NMR, 100 MHz, CDCl<sub>3</sub>)

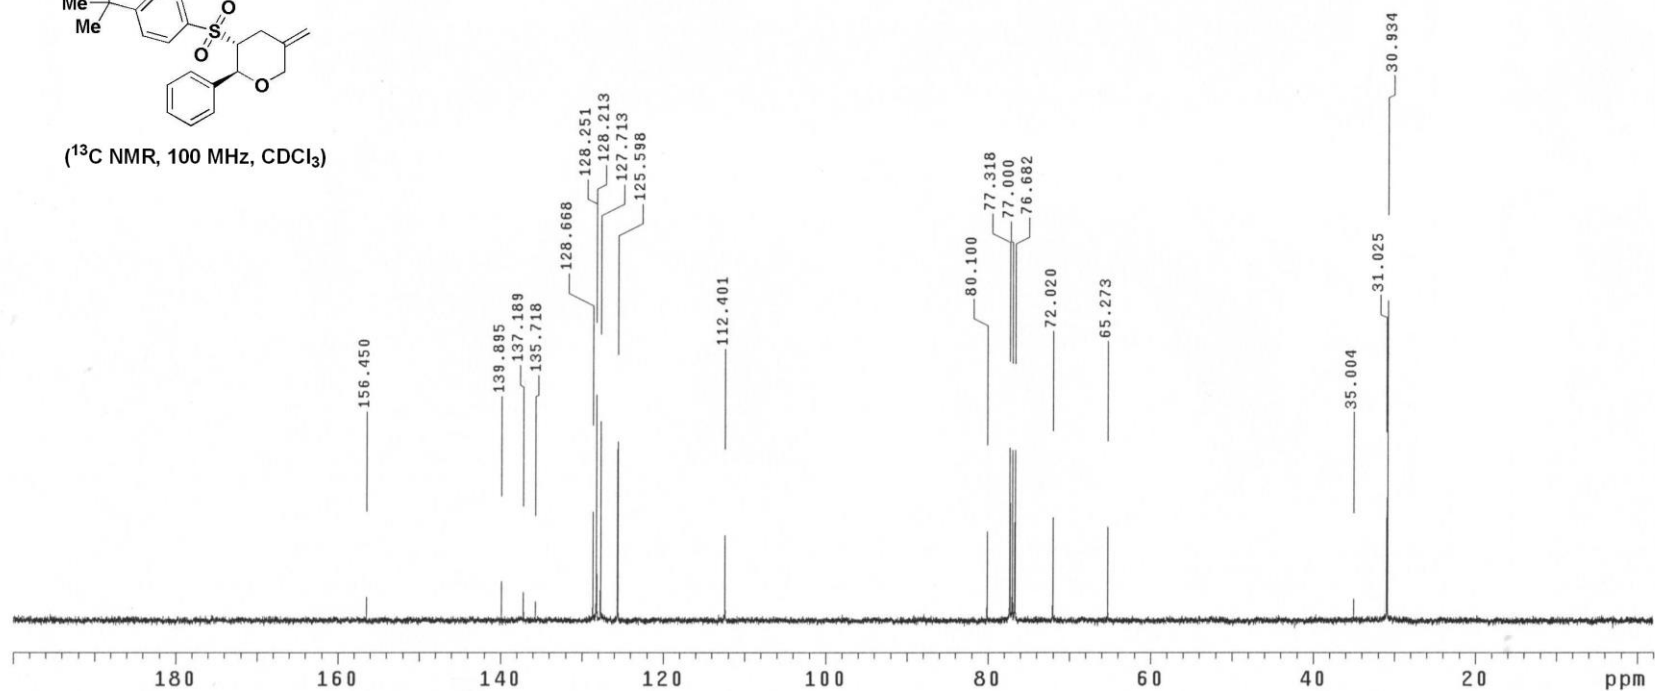

# Compound 5j (<sup>1</sup>H-NMR spectral data)

KT0609NB

Pulse Sequence: s2pu1

Mercury-400BB "MerPlus400"

Date: Sep 22 2020

Solvent: cdc13

Ambient temperature

Total 32 repetitions

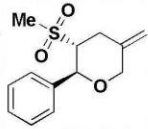

(<sup>1</sup>H NMR, 400 MHz, CDCl<sub>3</sub>)

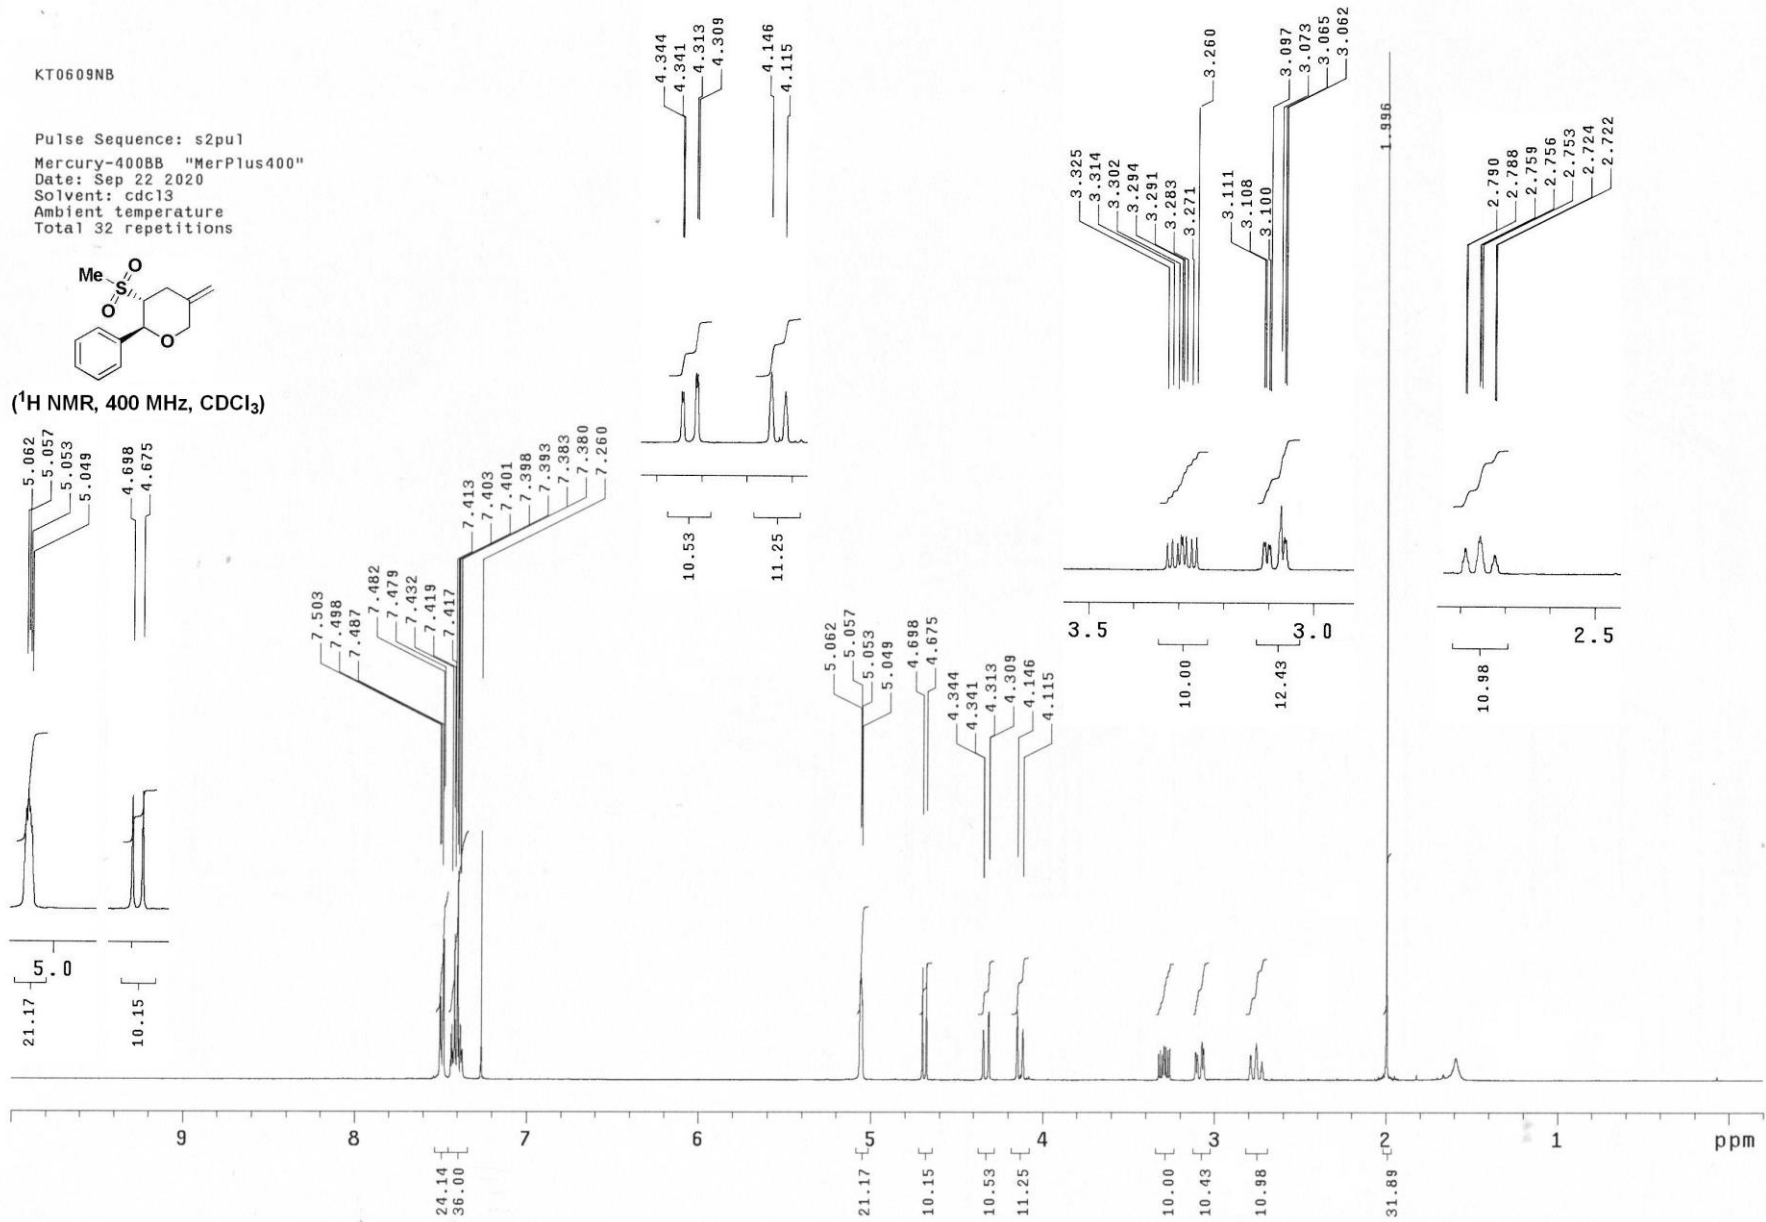

# Compound 5j (<sup>13</sup>C-NMR spectral data)

KT0609NB

Pulse Sequence: s2pu1  
Mercury-400BB "MerPlus400"  
Date: Sep 22 2020  
Solvent: cdcl3  
Ambient temperature  
Total 720 repetitions

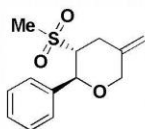

(<sup>13</sup>C NMR, 100 MHz, CDCl<sub>3</sub>)

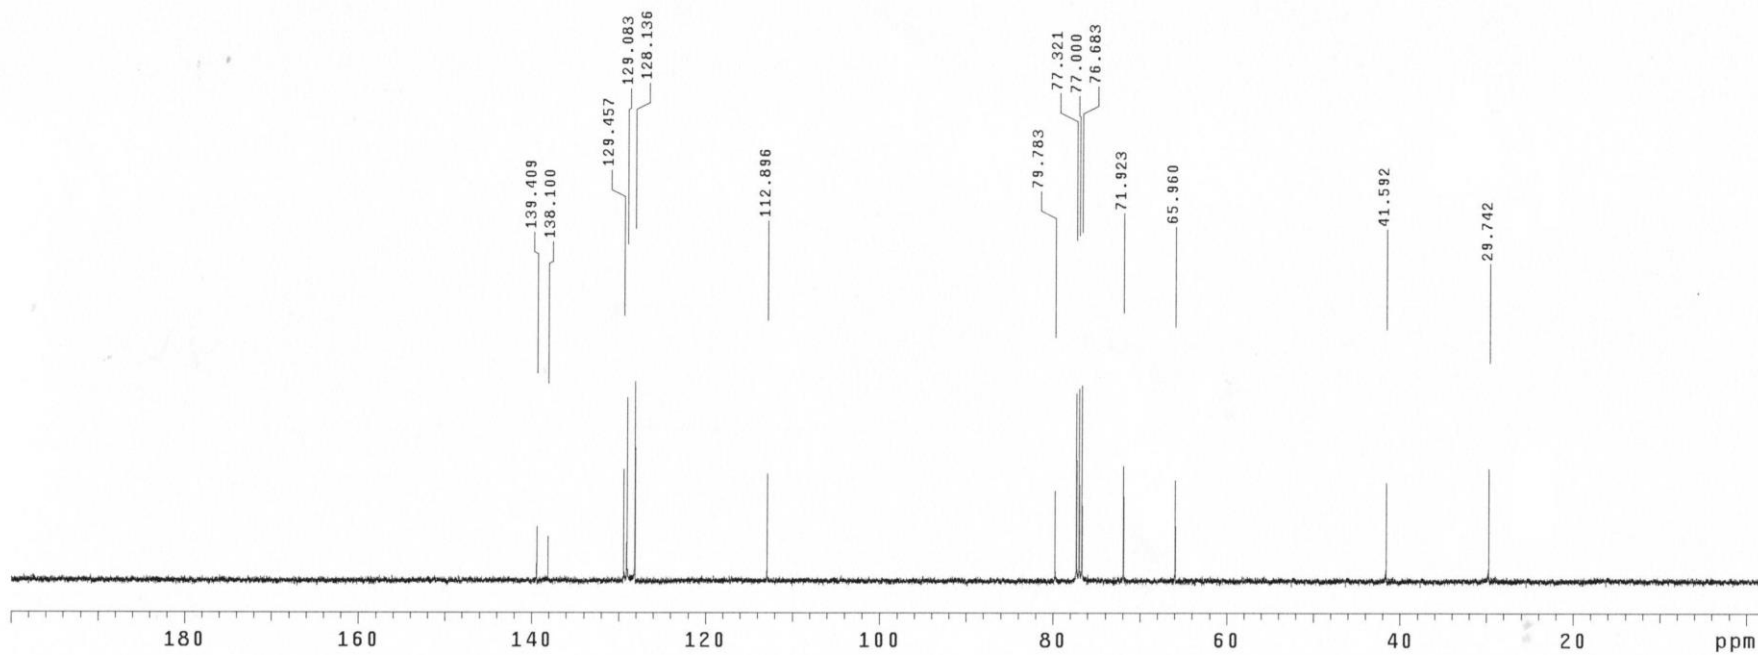

# Compound 5k (<sup>1</sup>H-NMR spectral data)

KT0622NB

Pulse Sequence: s2pu1

Solvent: CDCl<sub>3</sub>

Ambient temperature

UNITYplus-400 "unity400"

Pulse 38.8 degrees  
Acq. time 3.744 sec  
Width 6000.6 Hz  
64 repetitions  
OBSERVE H1, 400.2743814 MHz  
DATA PROCESSING  
FT size 65536  
Total time 4 min, 0 sec

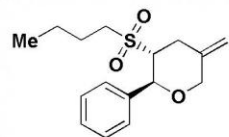

(<sup>1</sup>H NMR, 400 MHz, CDCl<sub>3</sub>)

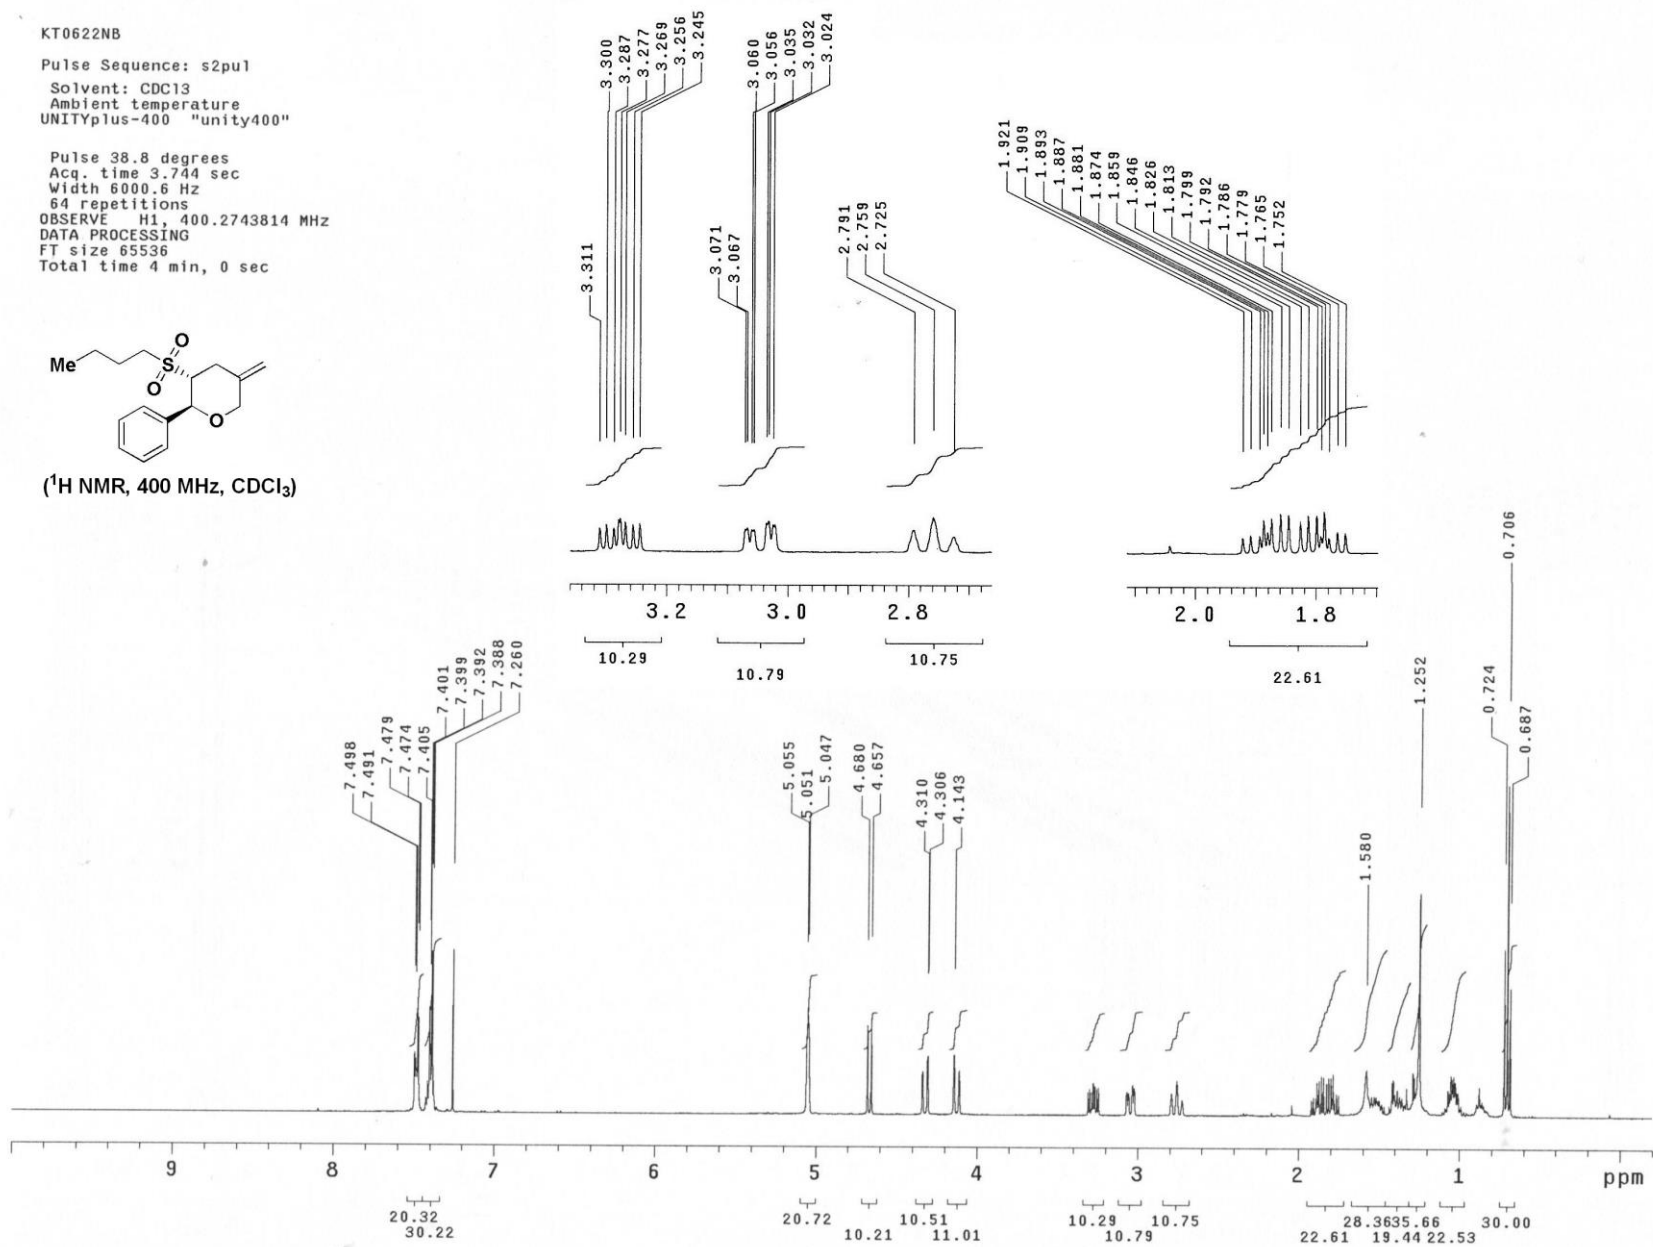

# Compound 5k (<sup>13</sup>C-NMR spectral data)

KT0622NB

Pulse Sequence: s2pu1

Solvent: CDCl<sub>3</sub>

Ambient temperature

UNITYplus-400 "unity400"

Relax. delay 0.500 sec  
Pulse 65.8 degrees  
Acq. time 0.800 sec  
Width 25000.0 Hz  
7232 repetitions  
OBSERVE C13, 100.6490731 MHz  
DECOUPLE H1, 400.2763980 MHz  
Power 43 dB  
on during acquisition  
off during delay  
WALTZ-16 modulated  
DATA PROCESSING  
Line broadening 1.0 Hz  
FT size 65536  
Total time 11 hr, 39 min, 7 sec

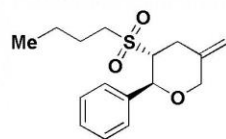

(<sup>13</sup>C NMR, 100 MHz, CDCl<sub>3</sub>)

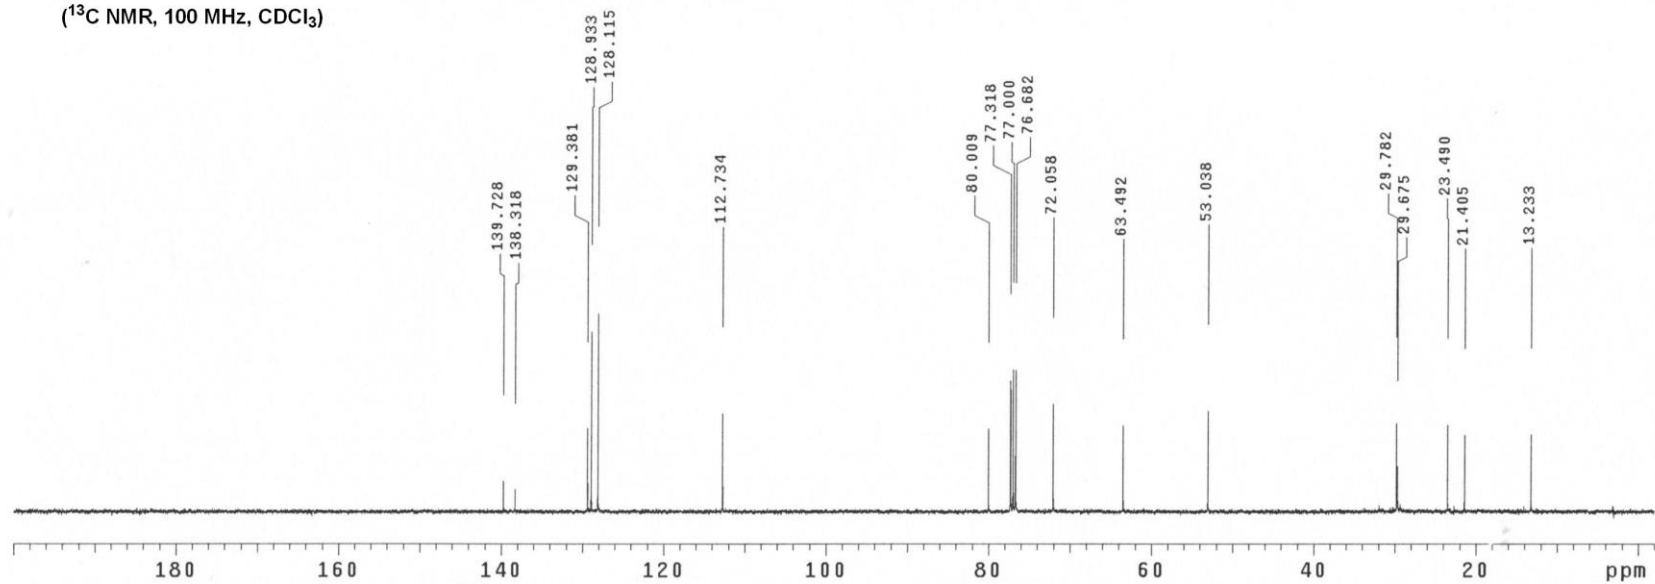

# Compound 5I (<sup>1</sup>H-NMR spectral data)

KT0506NB

Pulse Sequence: s2pu1  
 UNITYplus-400 "unity400"  
 Date: Jun 1 2020  
 Solvent: CDCl<sub>3</sub>  
 Ambient temperature  
 Total 64 repetitions

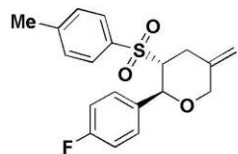

(<sup>1</sup>H NMR, 400 MHz, CDCl<sub>3</sub>)

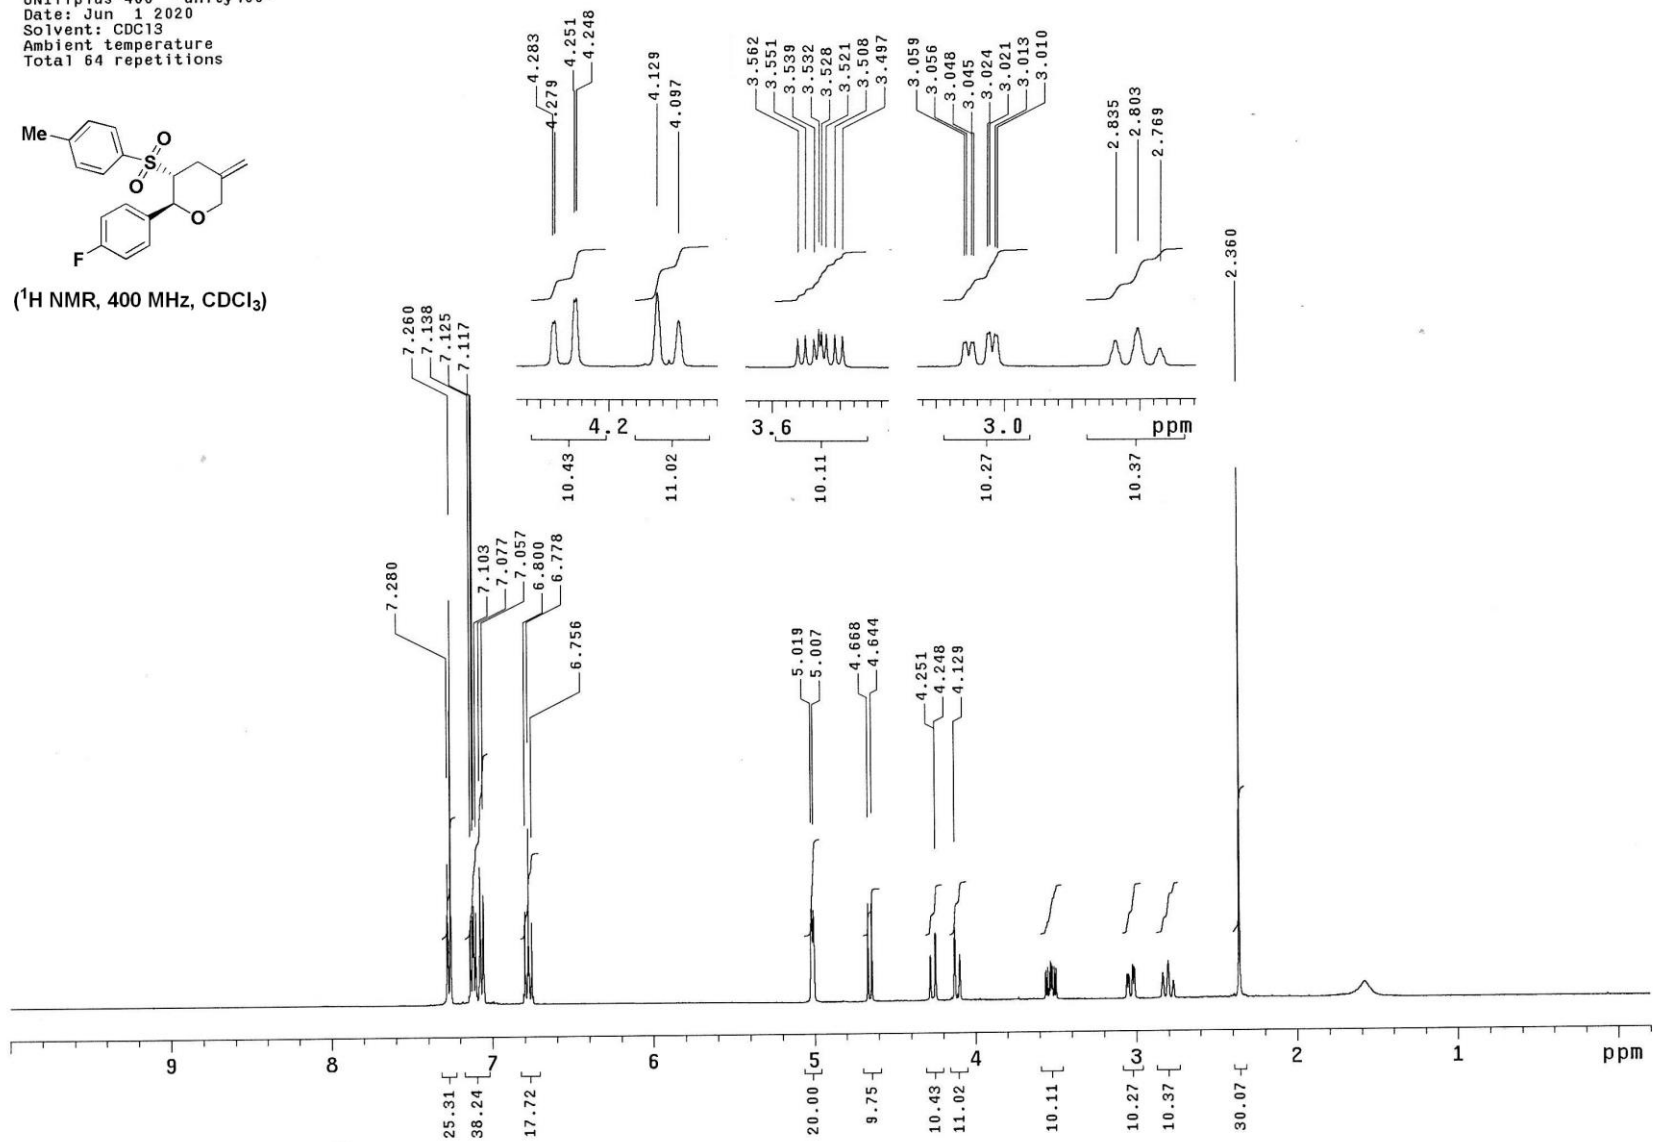



# Compound 5I (<sup>13</sup>C-NMR spectral data)

KT0506NB

Pulse Sequence: s2pu1  
UNITYplus-400 "unity400"  
Date: Jun 1 2020  
Solvent: CDCl<sub>3</sub>  
Ambient temperature  
Total 7040 repetitions

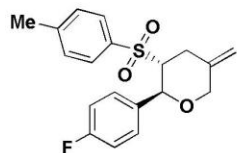

(<sup>13</sup>C NMR, 100 MHz, CDCl<sub>3</sub>)

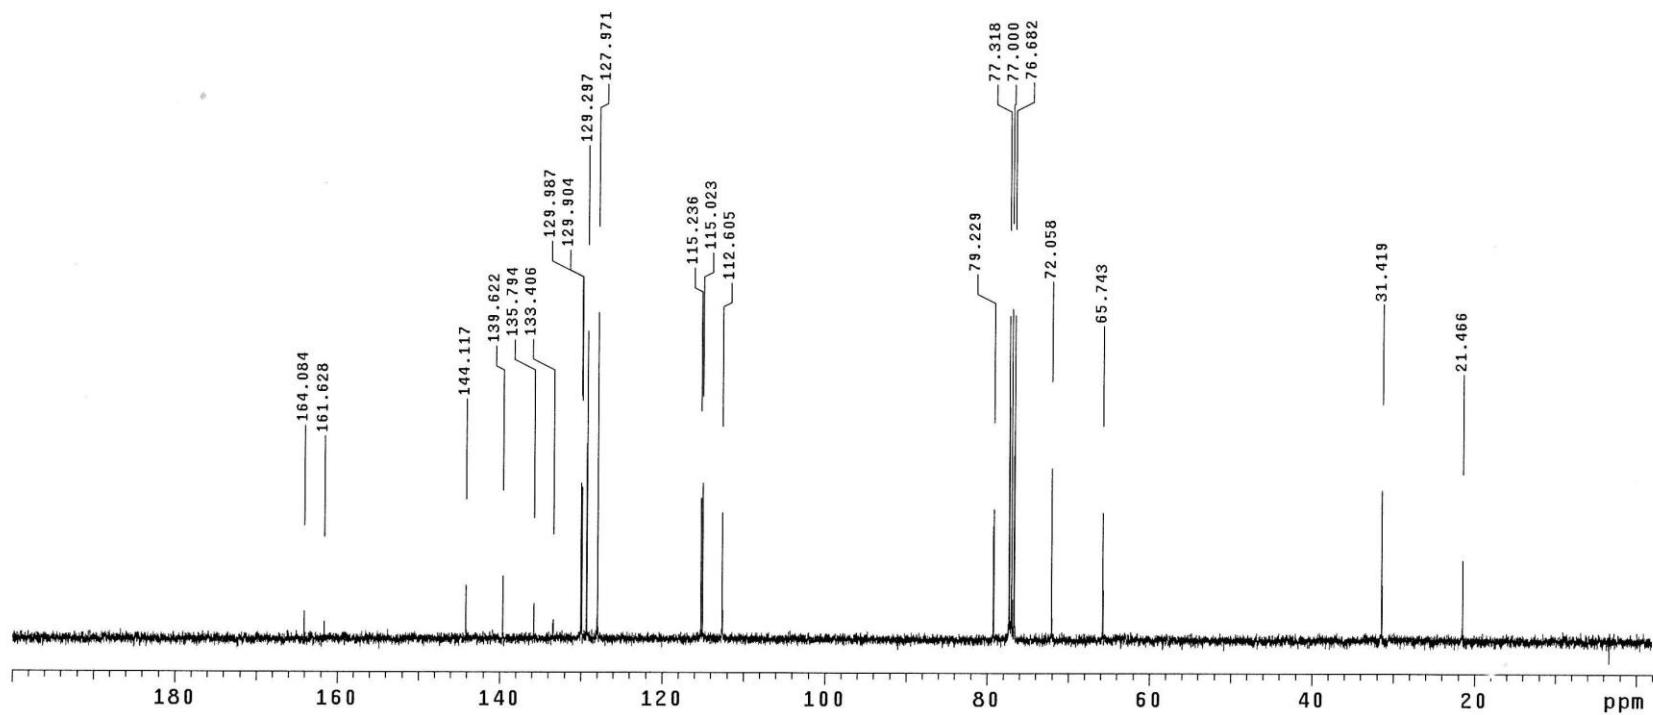

# Compound 5m (<sup>1</sup>H-NMR spectral data)

KTup37

Pulse Sequence: s2pu1  
 UNITYplus-400 "unity400"  
 Date: May 4 2020  
 Solvent: CDCl<sub>3</sub>  
 Ambient temperature  
 Total 32 repetitions

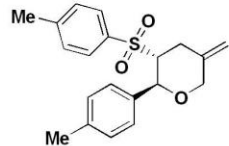

(<sup>1</sup>H NMR, 400 MHz, CDCl<sub>3</sub>)

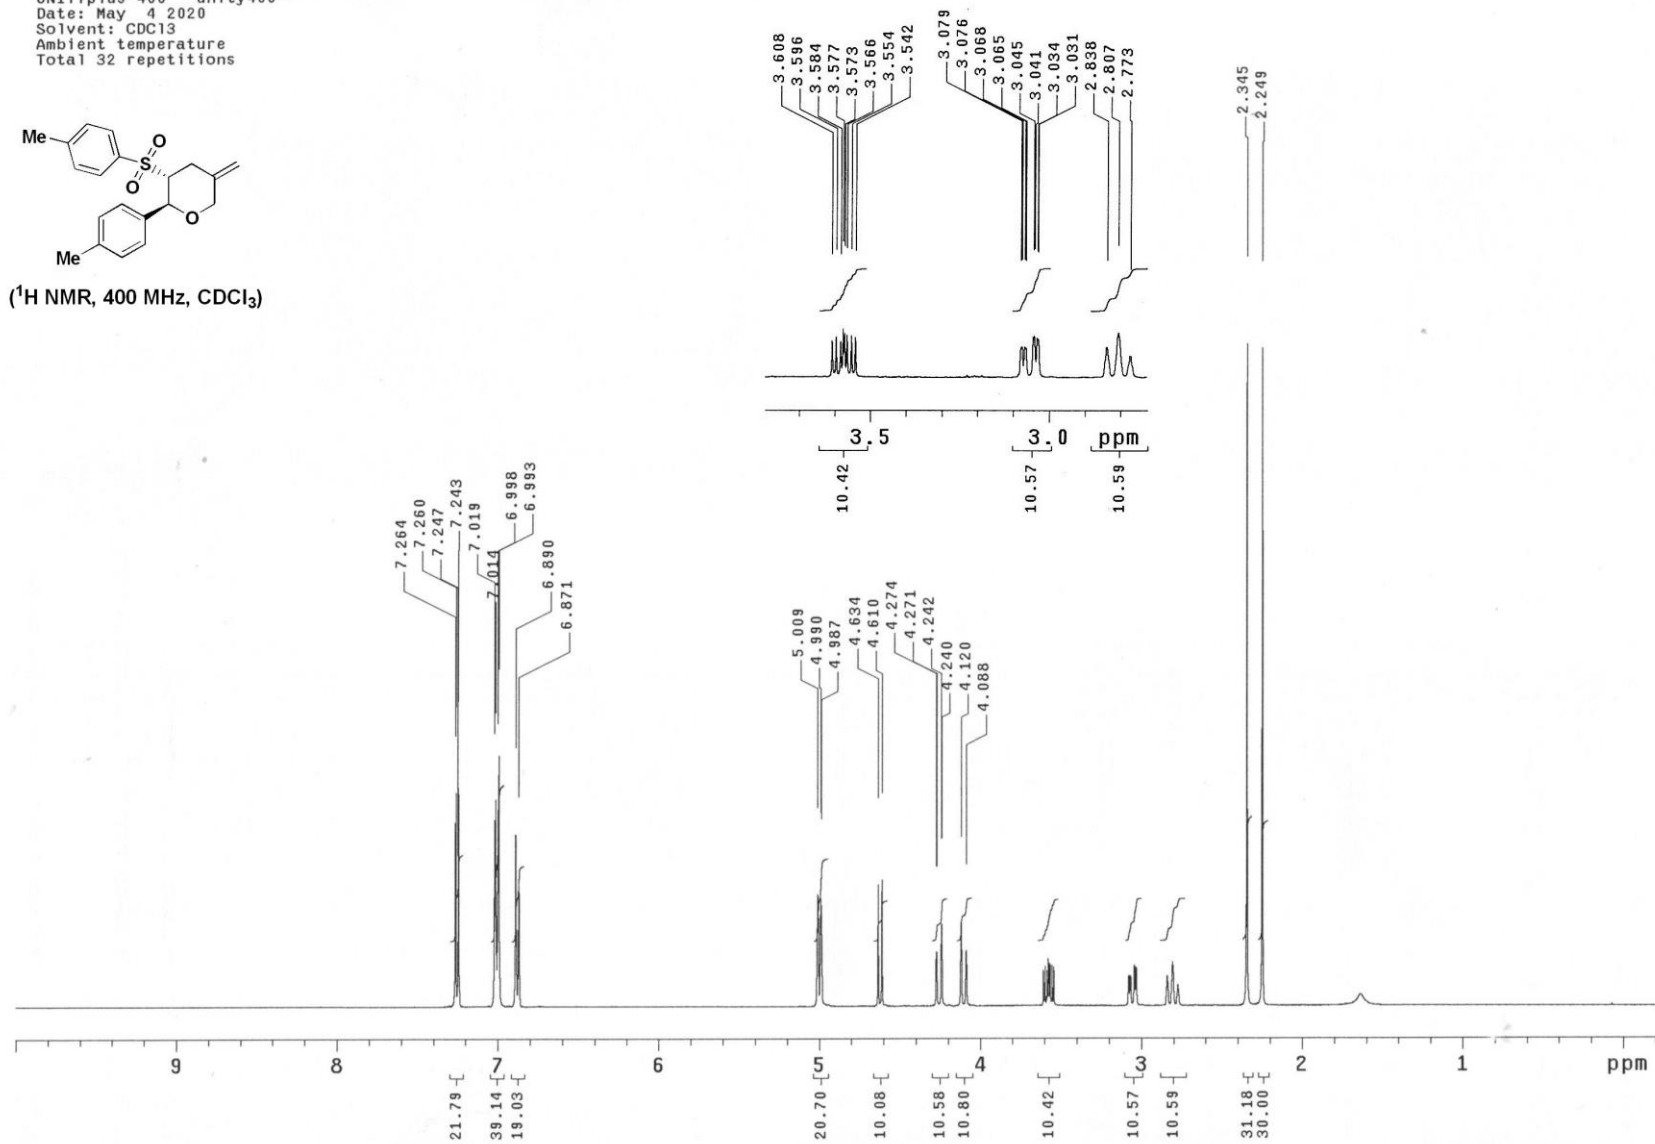

# Compound 5m (<sup>13</sup>C-NMR spectral data)

KTup37

Pulse Sequence: s2pu1

UNITYplus-400 "unity400"

Date: May 4 2020

Solvent: CDCl<sub>3</sub>

Ambient temperature

Total 1328 repetitions

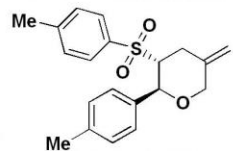

(<sup>13</sup>C NMR, 100 MHz, CDCl<sub>3</sub>)

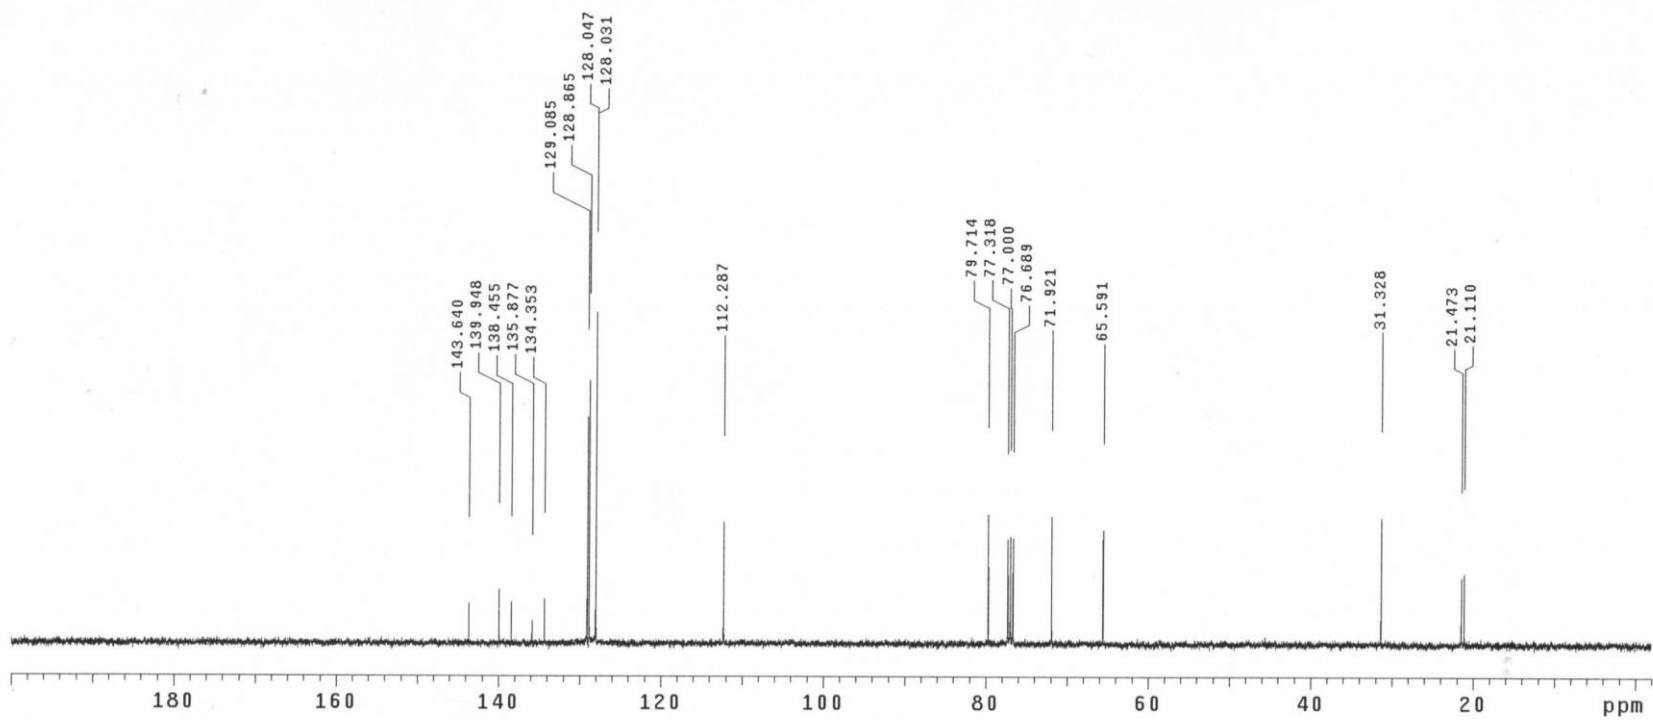

# Compound 5n (<sup>1</sup>H-NMR spectral data)

KT0424NB

Pulse Sequence: s2pu1  
UNITYplus-400 "unity400"  
Date: May 8 2020  
Solvent: CDCl<sub>3</sub>  
Ambient temperature  
Total 32 repetitions

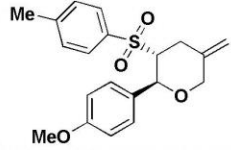

(<sup>1</sup>H NMR, 400 MHz, CDCl<sub>3</sub>)

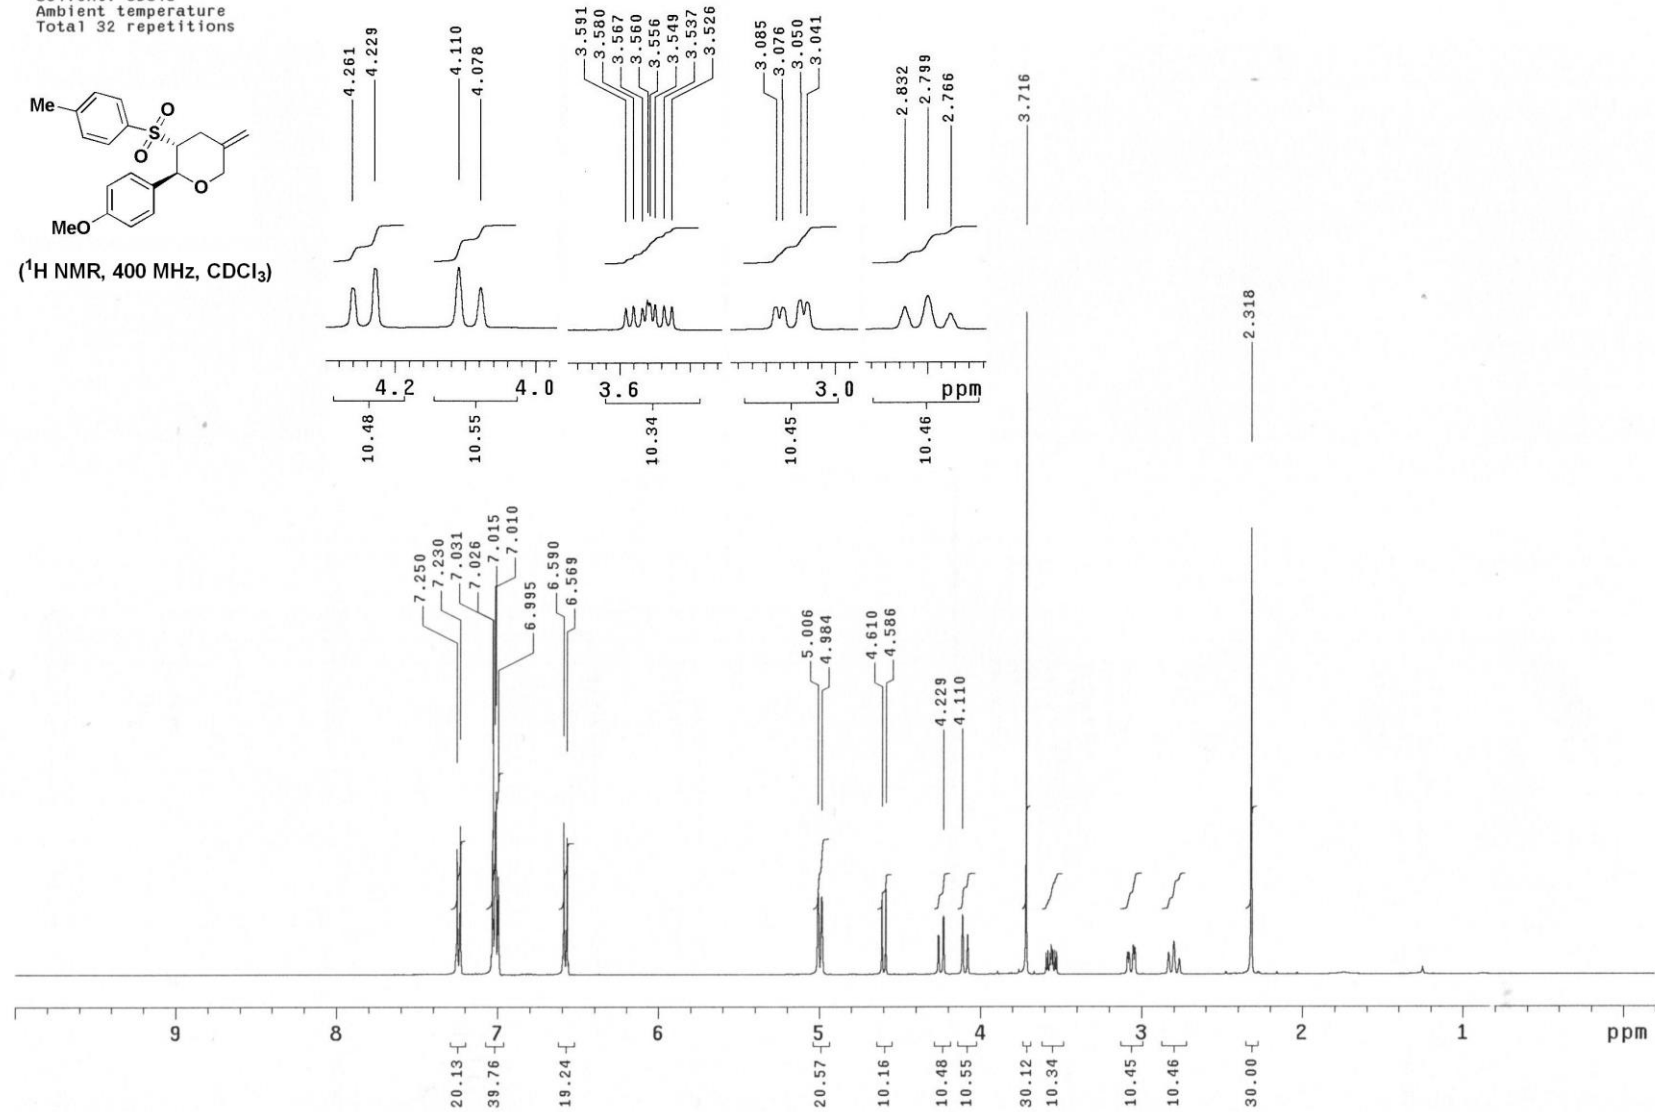

# Compound 5n (<sup>13</sup>C-NMR spectral data)

KT0424NB

Pulse Sequence: s2pu1  
UNITYplus-400 "unity400"  
Date: May 8 2020  
Solvent: CDCl<sub>3</sub>  
Ambient temperature  
Total 320 repetitions

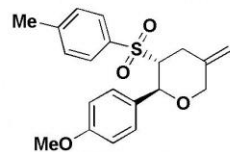

(<sup>13</sup>C NMR, 100 MHz, CDCl<sub>3</sub>)

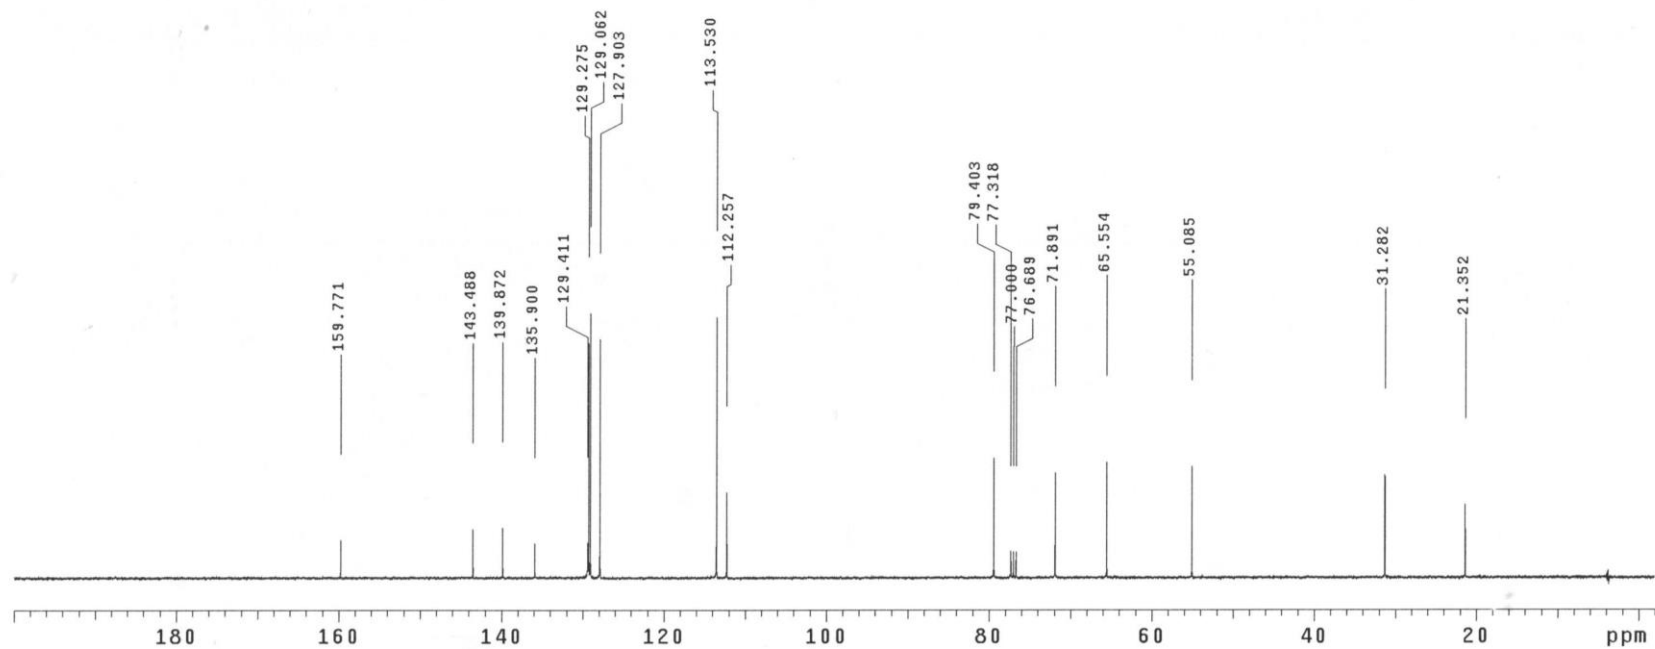

# Compound 5q (<sup>1</sup>H-NMR spectral data)

KT0505NB

Pulse Sequence: s2pu1  
 UNITYplus-400 "unity400"  
 Date: May 18 2020  
 Solvent: CDC13  
 Ambient temperature  
 Total 32 repetitions

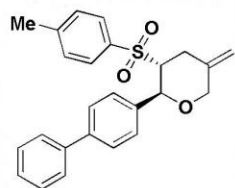

(<sup>1</sup>H NMR, 400 MHz, CDCl<sub>3</sub>)

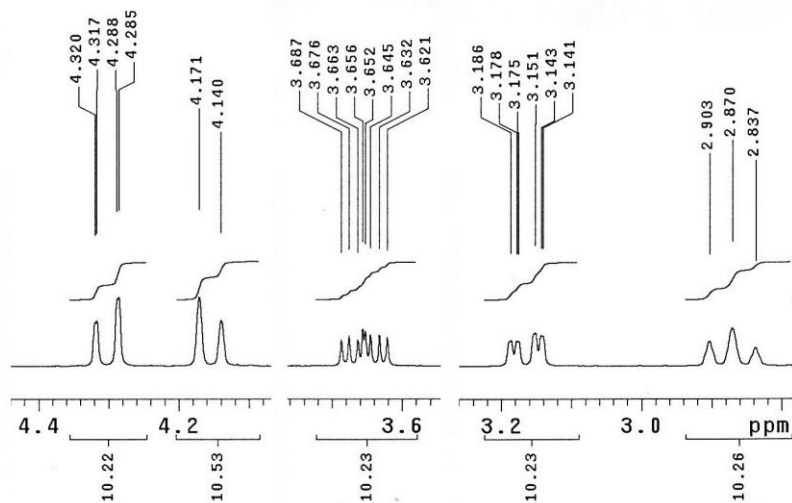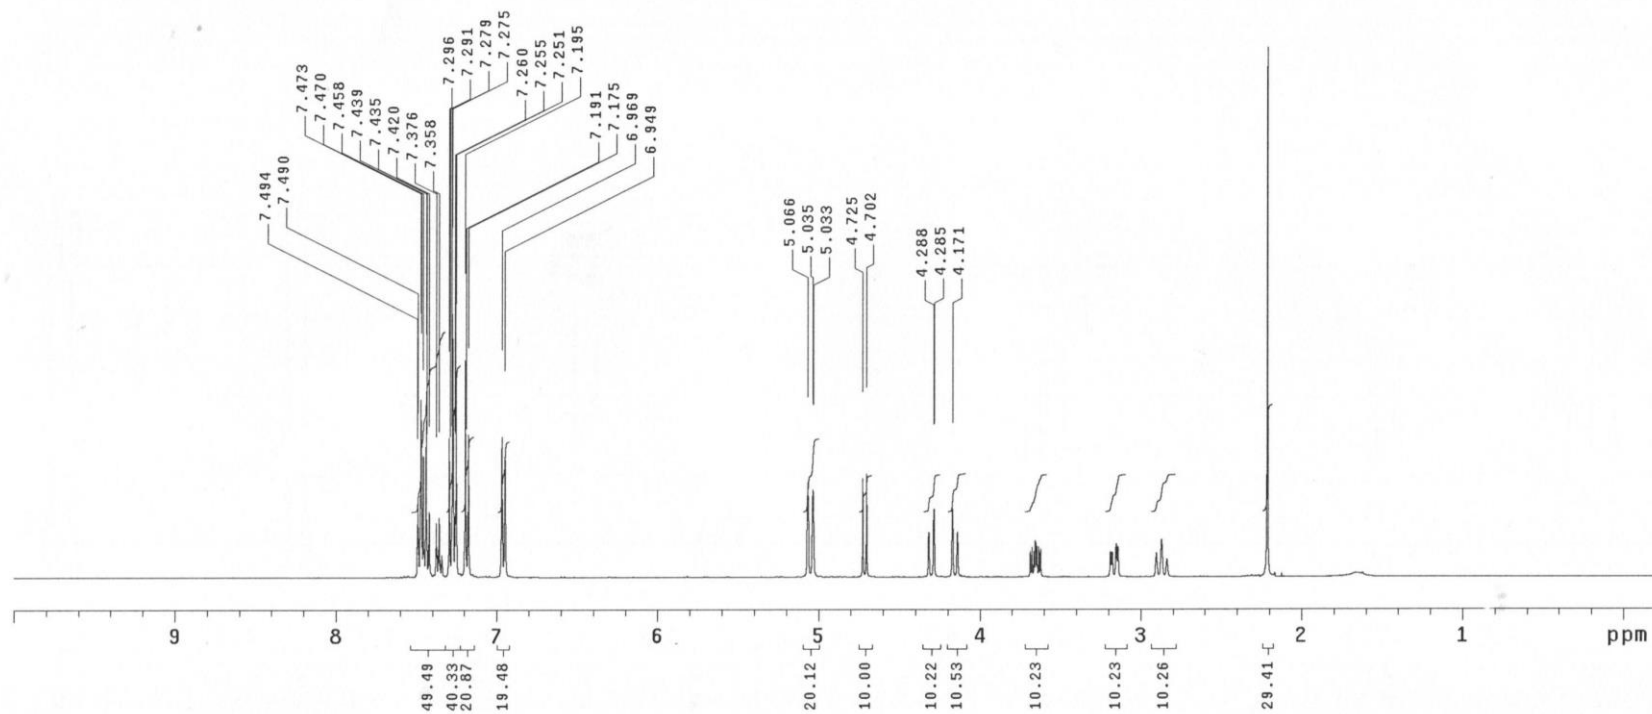

# Compound 5q (<sup>13</sup>C-NMR spectral data)

KT0505NB

Pulse Sequence: s2pu1  
UNITYplus-400 "unity400"  
Date: May 18 2020  
Solvent: CDCl<sub>3</sub>  
Ambient temperature  
Total 64000 repetitions

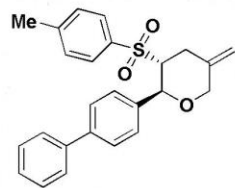

(<sup>13</sup>C NMR, 100 MHz, CDCl<sub>3</sub>)

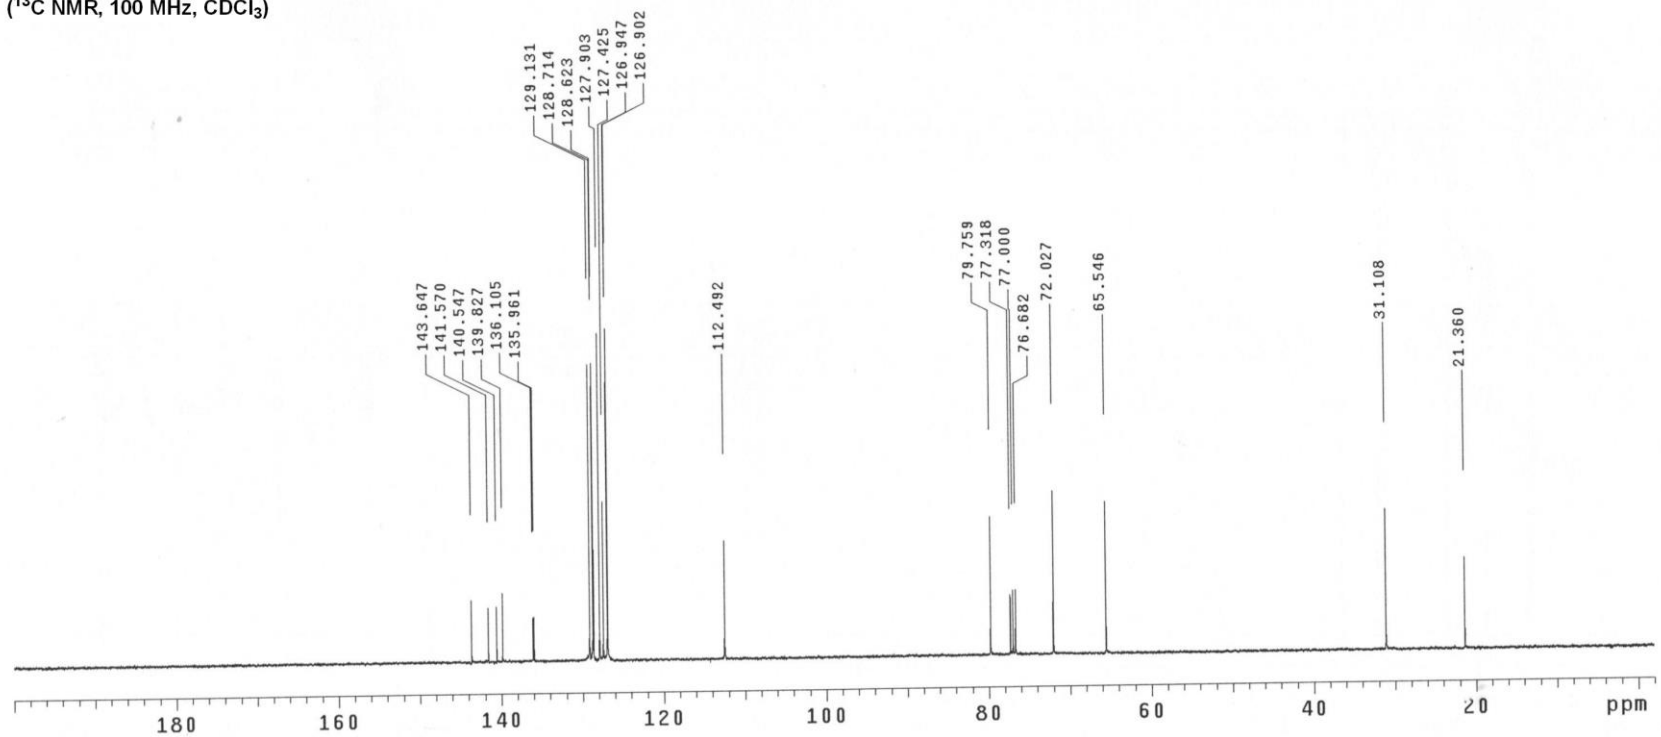

# Compound 5r (<sup>1</sup>H-NMR spectral data)

KT0513NB

Pulse Sequence: s2pu1  
 UNITYplus-400 "unity400"  
 Date: May 21 2020  
 Solvent: CDCl<sub>3</sub>  
 Ambient temperature  
 Total 32 repetitions

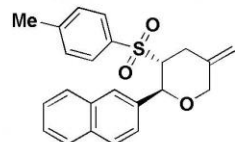

(<sup>1</sup>H NMR, 400 MHz, CDCl<sub>3</sub>)

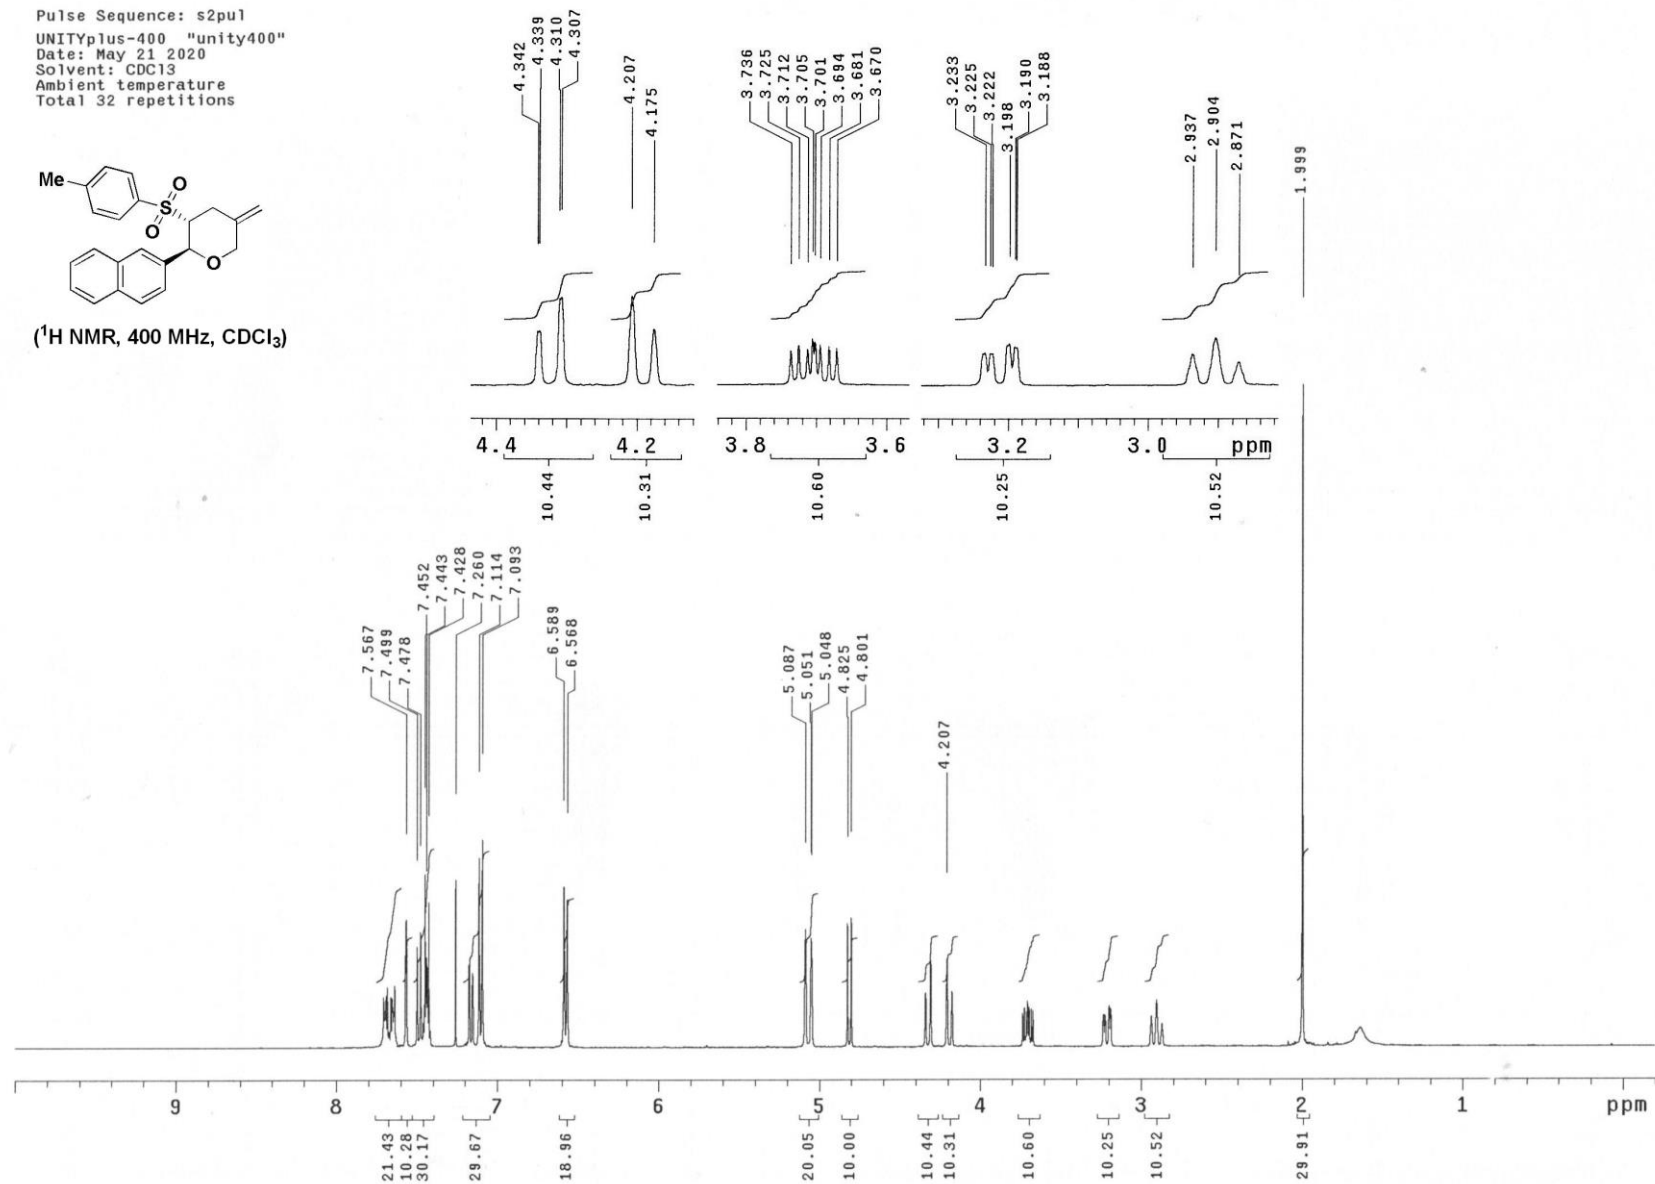



# Compound 5r (<sup>13</sup>C-NMR spectral data)

KT0513NB

Pulse Sequence: s2pu1

UNITYplus-400 "unity400"

Date: May 21 2020

Solvent: CDCl<sub>3</sub>

Ambient temperature

Total 2320 repetitions

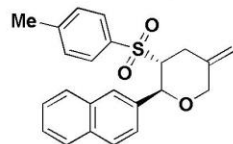

(<sup>13</sup>C NMR, 100 MHz, CDCl<sub>3</sub>)

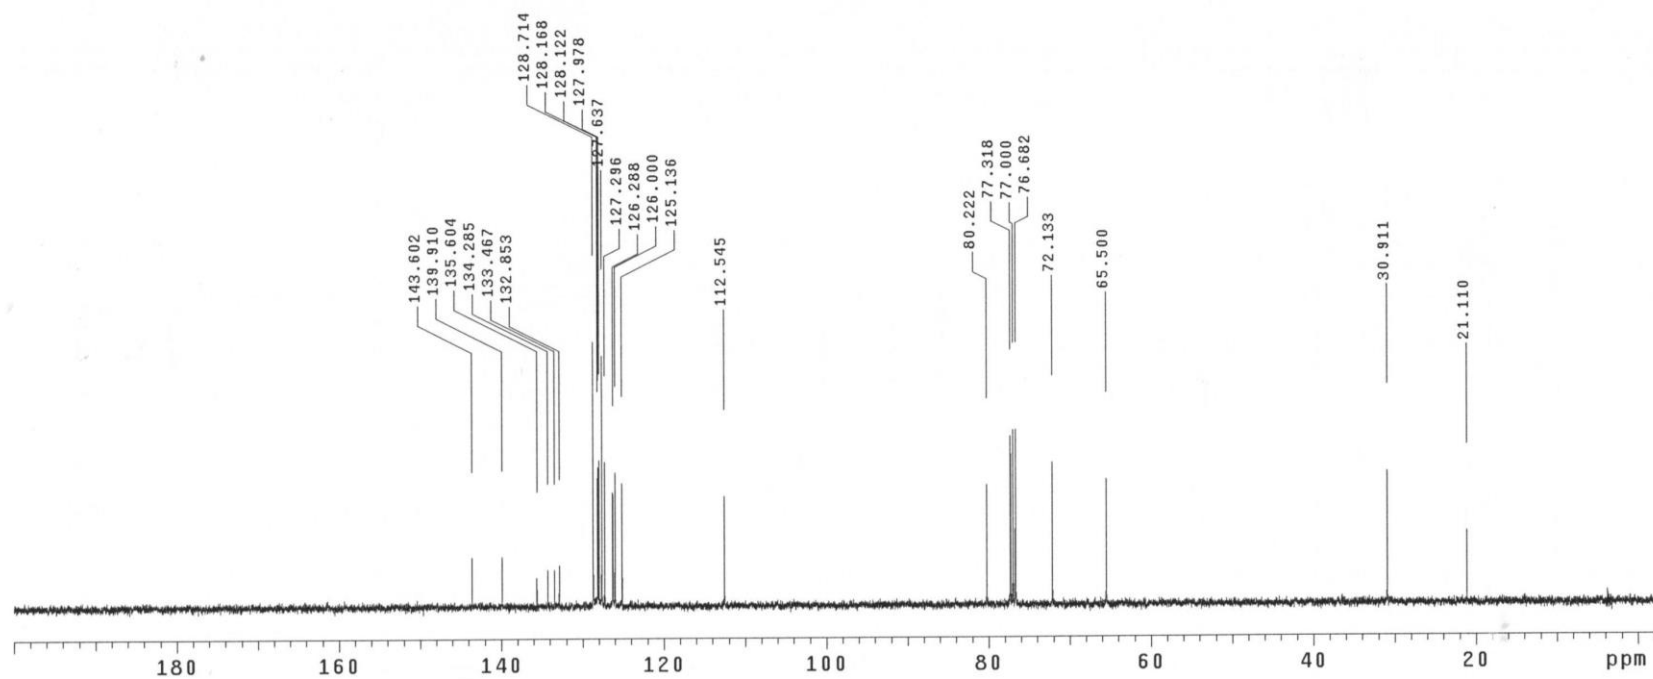

# Compound 5s (<sup>1</sup>H-NMR spectral data)

KT0715NB

Pulse Sequence: s2pu1

UNITYplus-400 "unity400"

Date: Aug 27 2020

Solvent: CDCl<sub>3</sub>

Ambient temperature

Total 32 repetitions

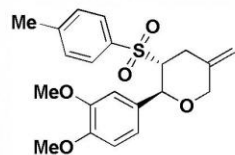

(<sup>1</sup>H NMR, 400 MHz, CDCl<sub>3</sub>)

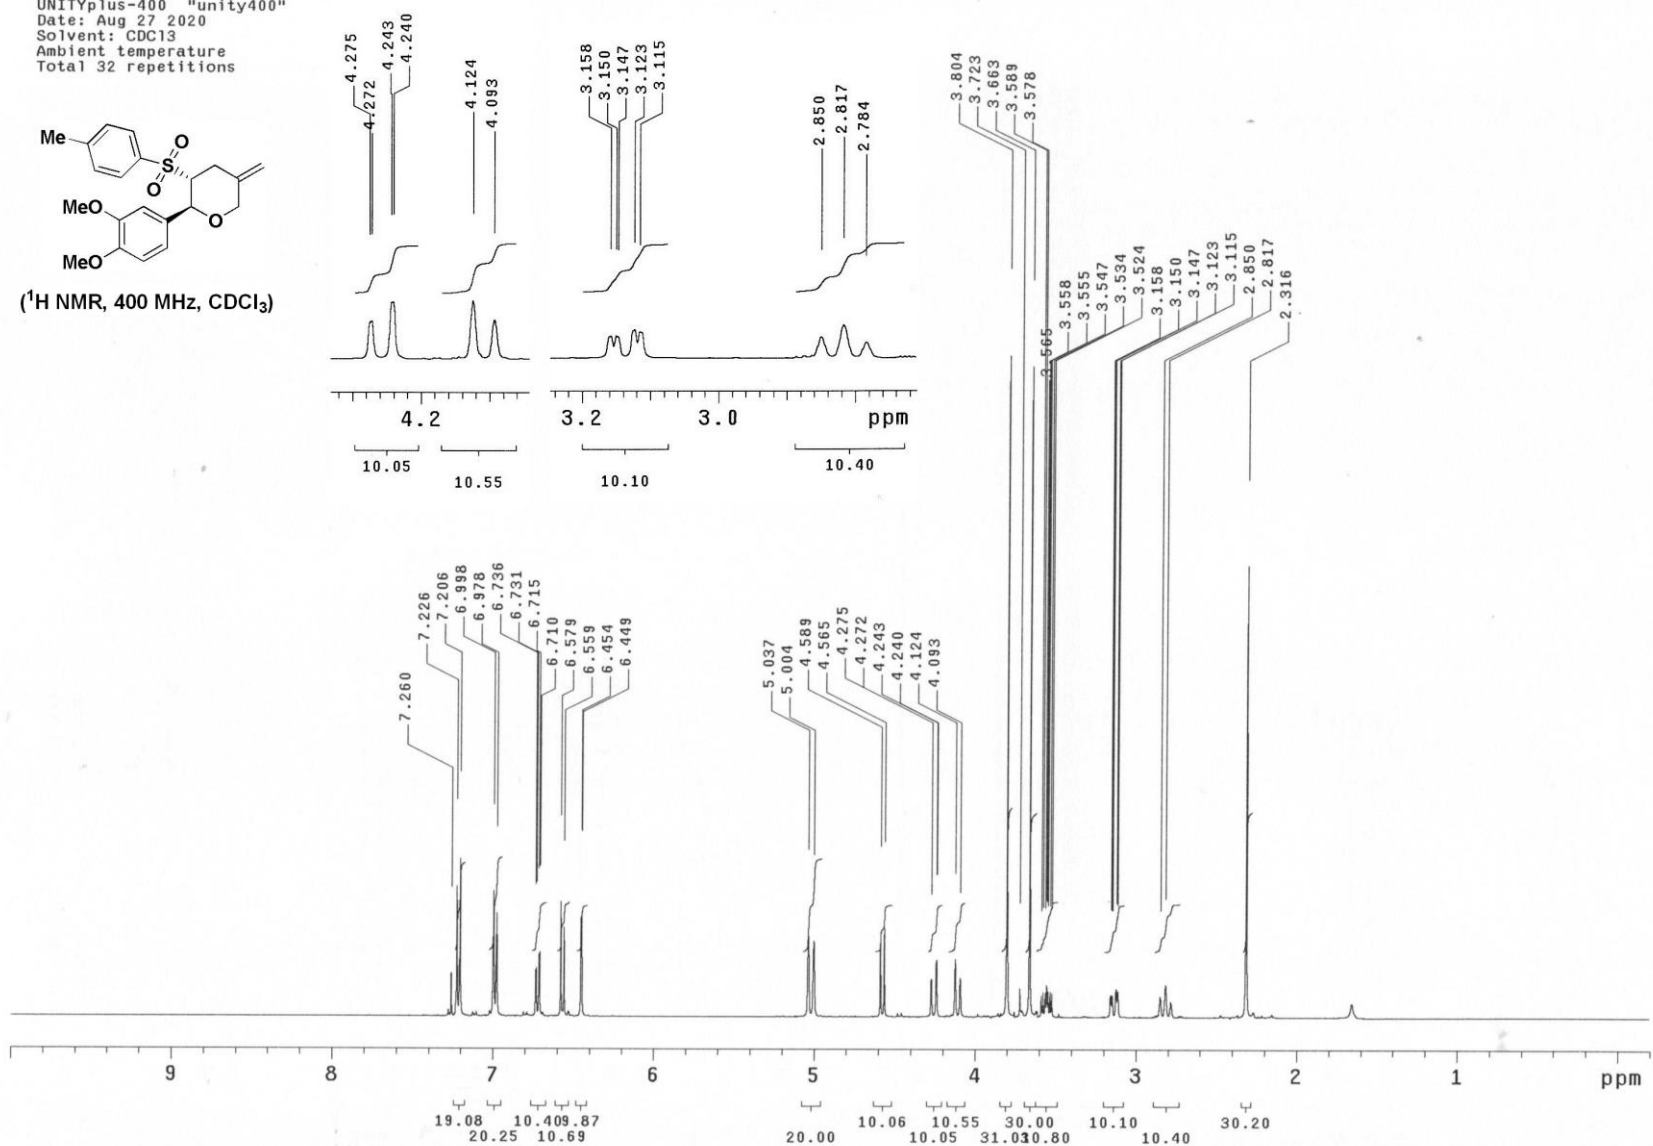

# Compound 5s (<sup>13</sup>C-NMR spectral data)

KT0715NB

Pulse Sequence: s2pu1  
UNITYplus-400 "unity400"  
Date: Aug 27 2020  
Solvent: CDCl<sub>3</sub>  
Ambient temperature  
Total 912 repetitions

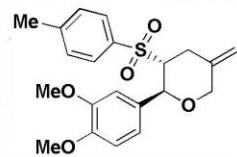

(<sup>13</sup>C NMR, 100 MHz, CDCl<sub>3</sub>)

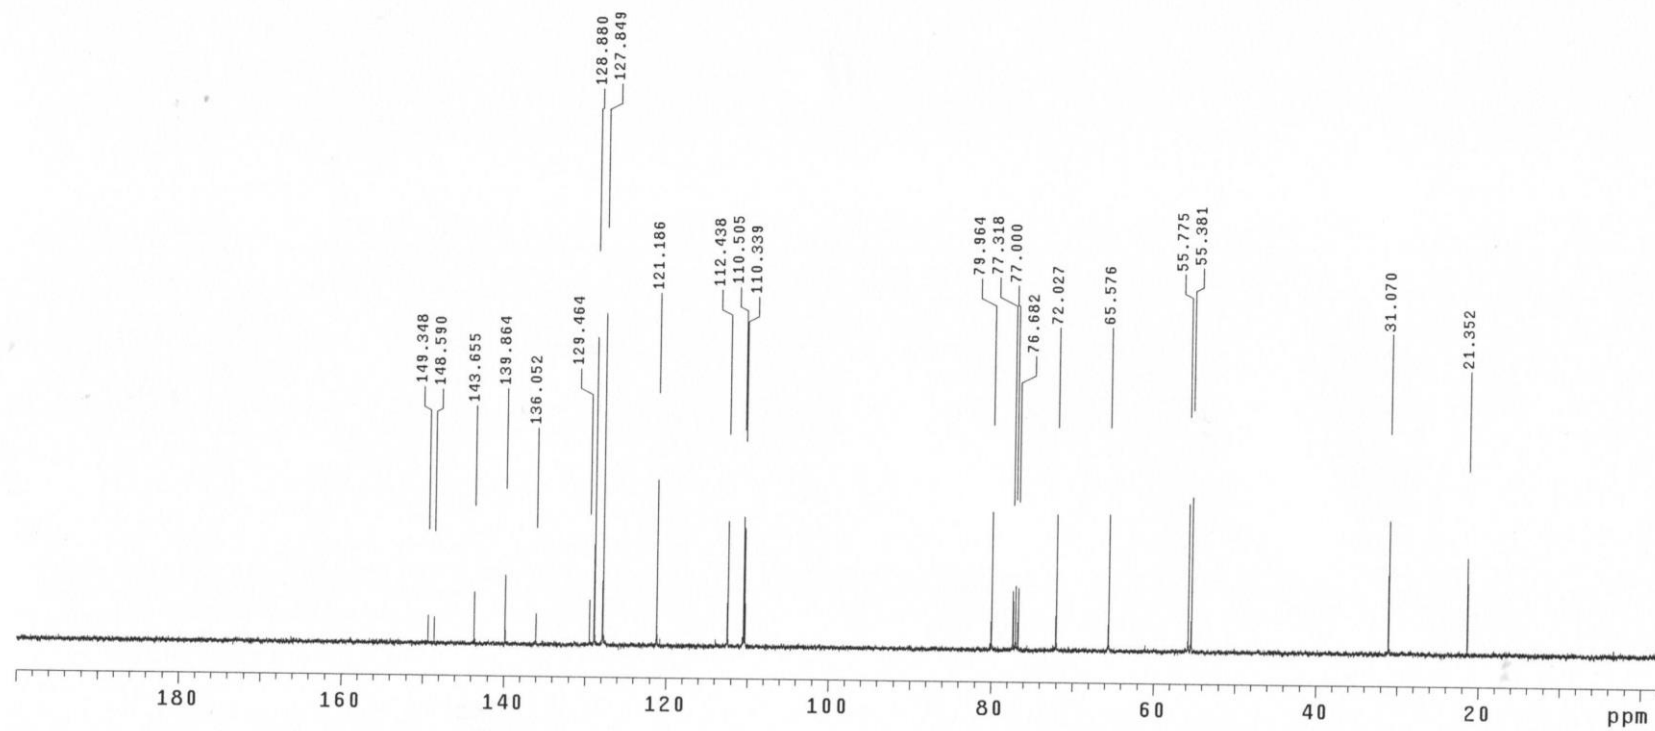

# Compound 5t (<sup>1</sup>H-NMR spectral data)

KT0713NB

Pulse Sequence: s2pu1

UNITYplus-400 "unity400"

Date: Jul 29 2020

Solvent: CDCl<sub>3</sub>

Ambient temperature

Total 32 repetitions

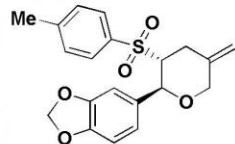

(<sup>1</sup>H NMR, 400 MHz, CDCl<sub>3</sub>)

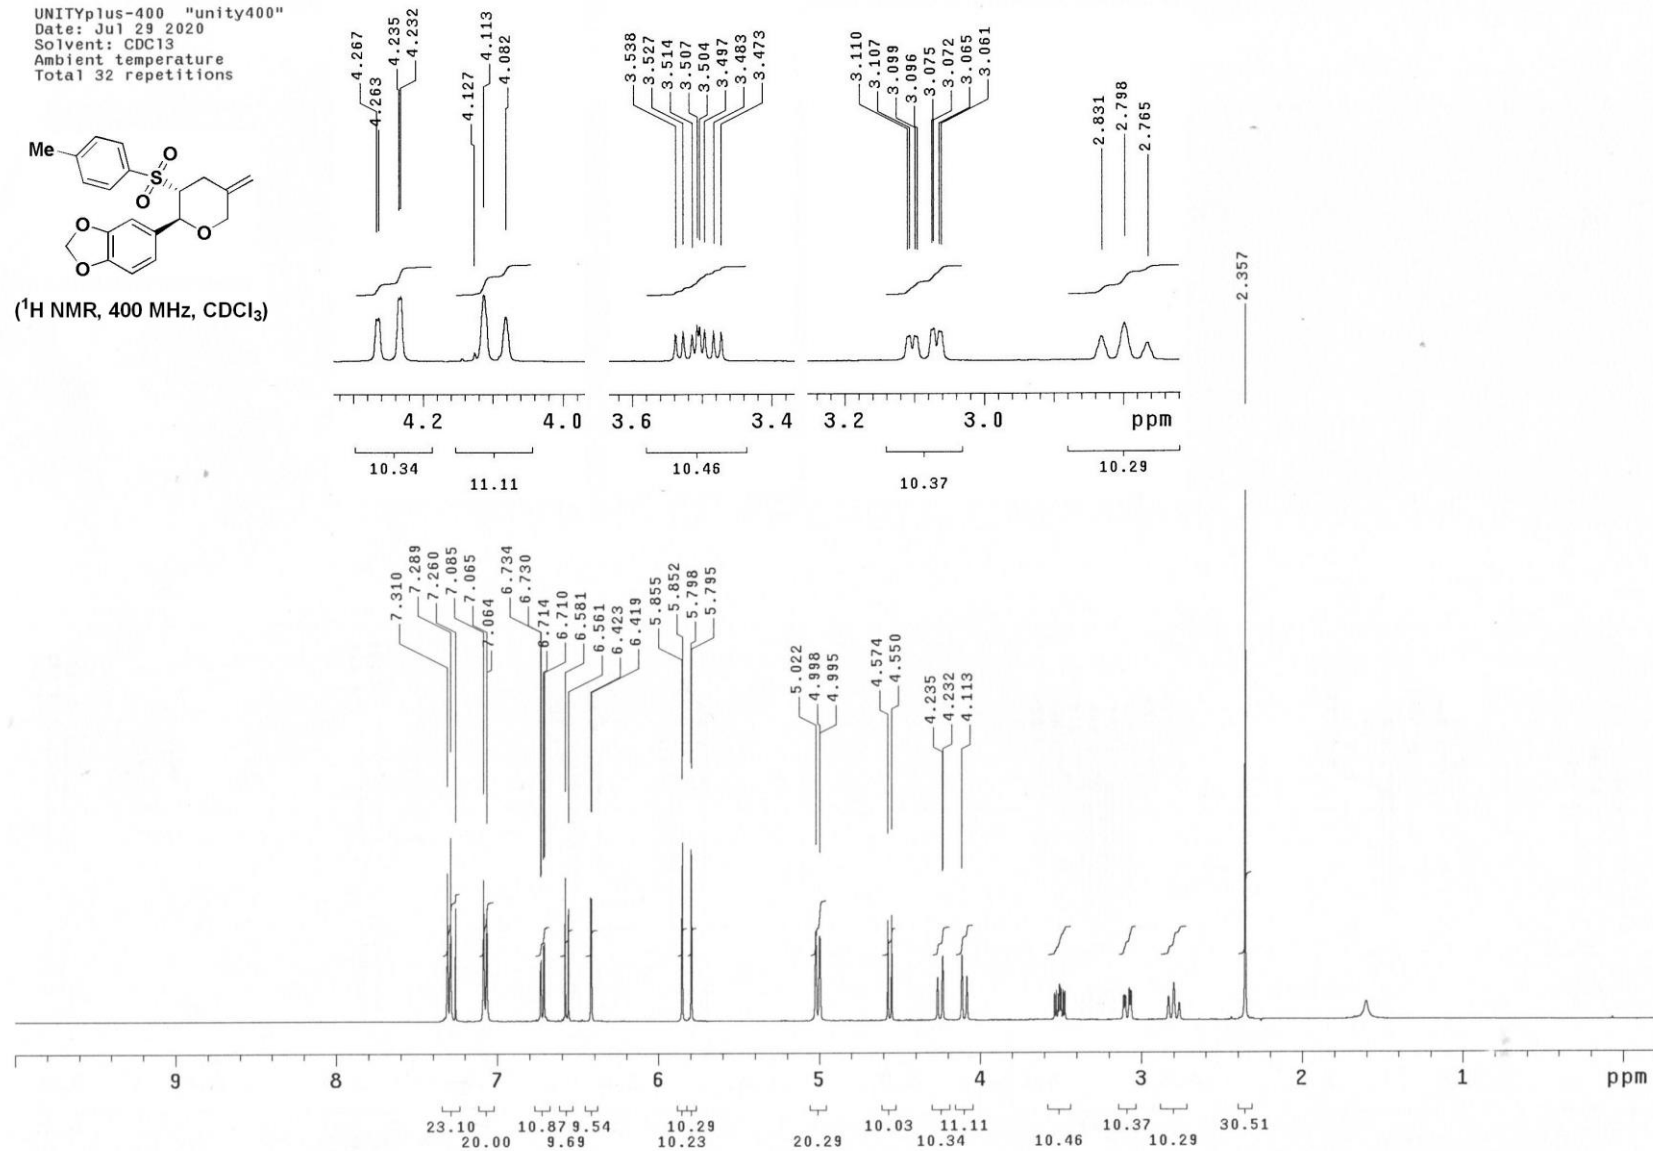

# Compound 5t (<sup>13</sup>C-NMR spectral data)

KT0713NB

Pulse Sequence: s2pu1

UNITYplus-400 "unity400"

Date: Jul 29 2020

Solvent: CDCl<sub>3</sub>

Ambient temperature

Total 1376 repetitions

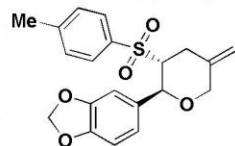

(<sup>13</sup>C NMR, 100 MHz, CDCl<sub>3</sub>)

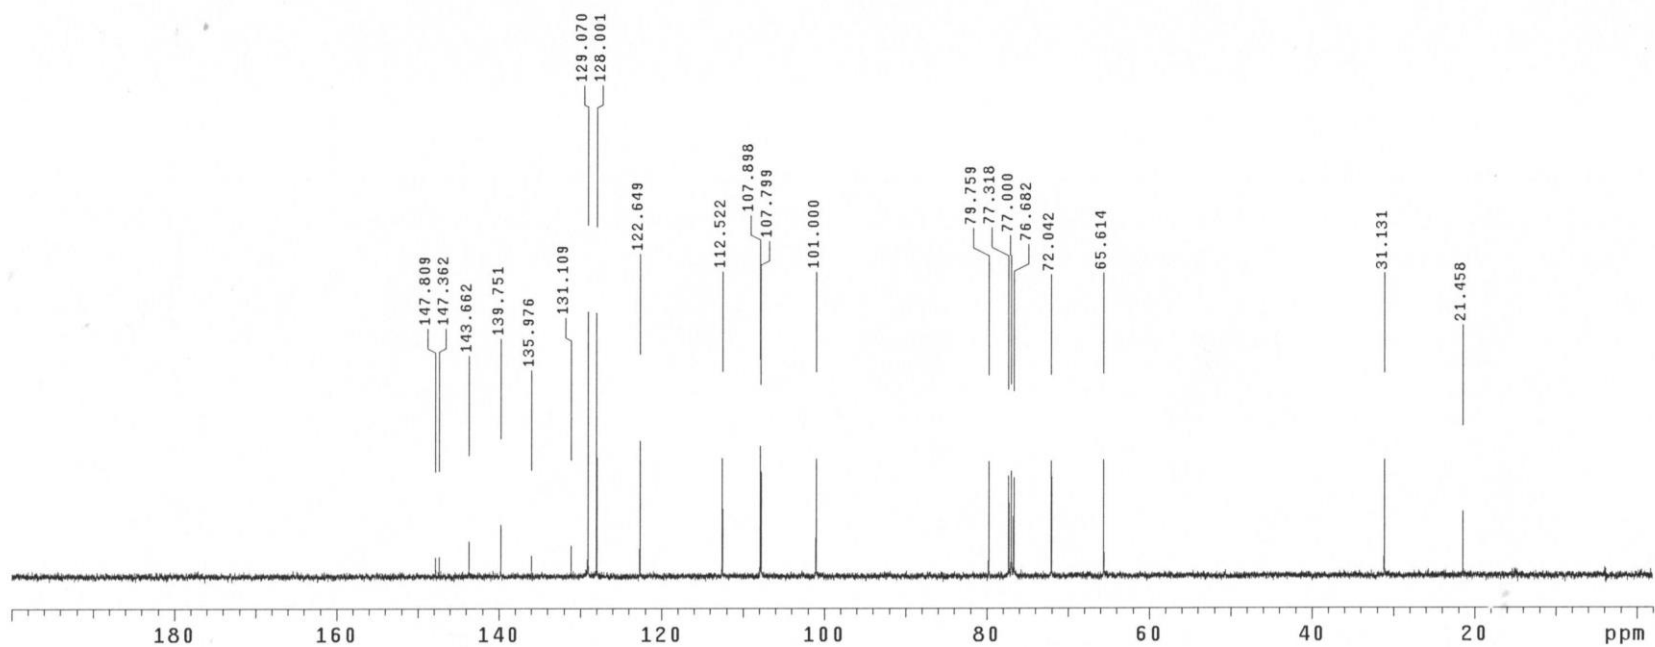

# Compound 5u-1 (<sup>1</sup>H-NMR spectral data)

KT0804NB-1

Pulse Sequence: s2pu1  
 UNITYplus-400 "unity400"  
 Date: Oct 14 2020  
 Solvent: CDCl<sub>3</sub>  
 Ambient temperature  
 Total 64 repetitions

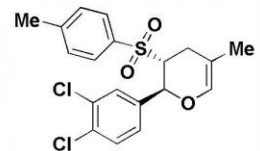

(<sup>1</sup>H NMR, 400 MHz, CDCl<sub>3</sub>)

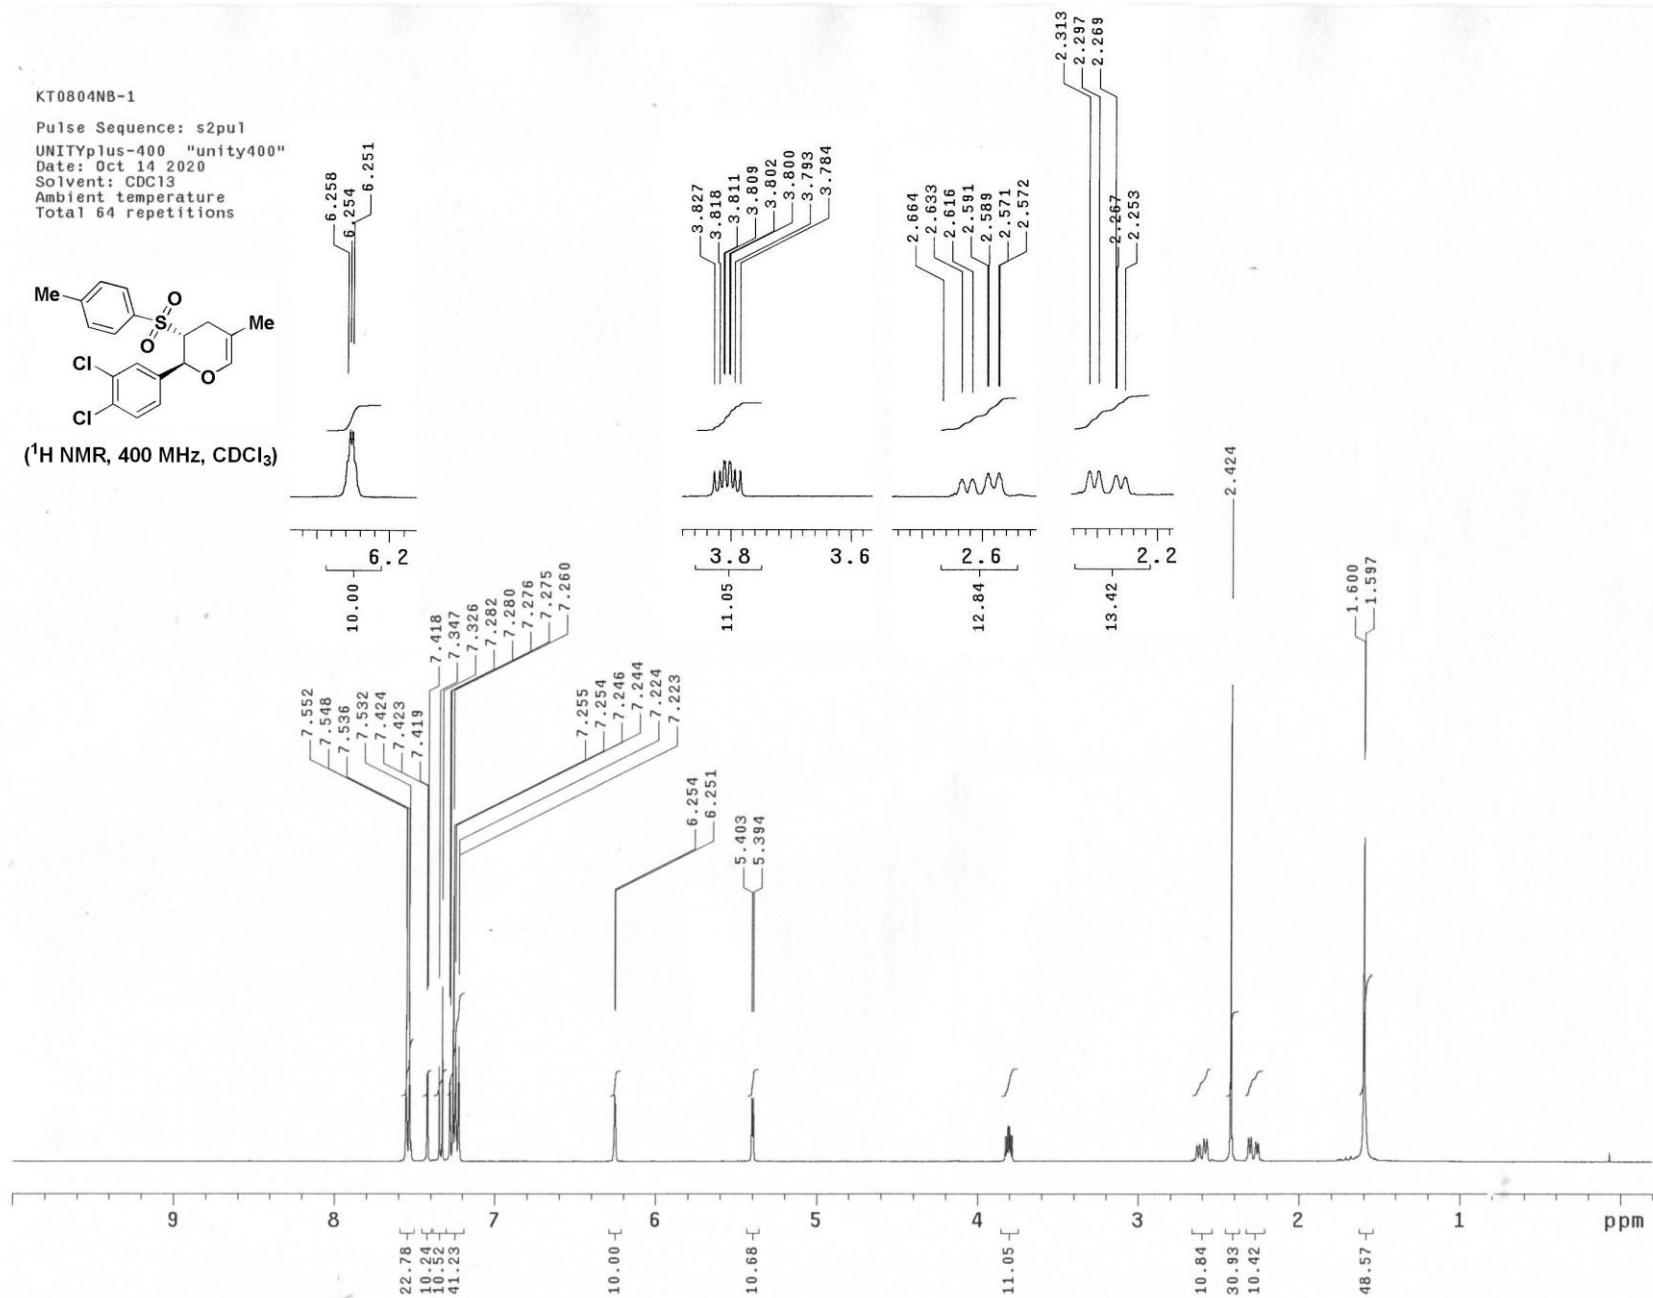

# Compound 5u-1 (<sup>13</sup>C-NMR spectral data)

KT0804NB-1

Pulse Sequence: s2pu1  
UNITYplus-400 "unity400"  
Date: Oct 14 2020  
Solvent: CDCl<sub>3</sub>  
Ambient temperature  
Total 5008 repetitions

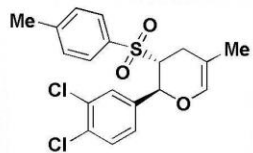

(<sup>13</sup>C NMR, 100 MHz, CDCl<sub>3</sub>)

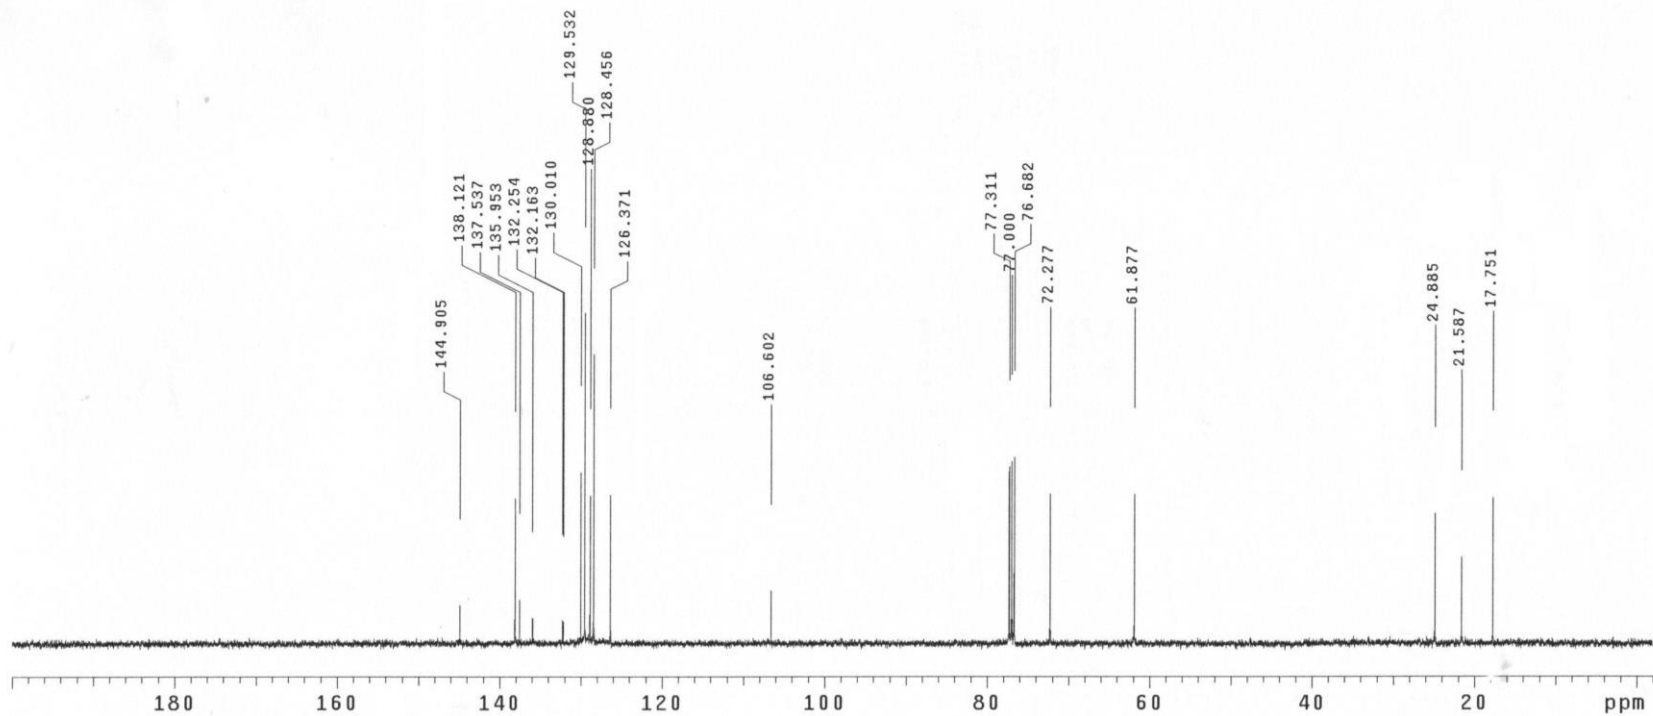

# Compound 5v (<sup>1</sup>H-NMR spectral data)

KT0810NB

Pulse Sequence: s2pu1

UNITYplus-400 "unity400"

Date: Sep 21 2020

Solvent: CDCl<sub>3</sub>

Ambient temperature

Total 32 repetitions

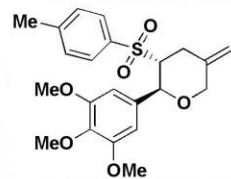

(<sup>1</sup>H NMR, 400 MHz, CDCl<sub>3</sub>)

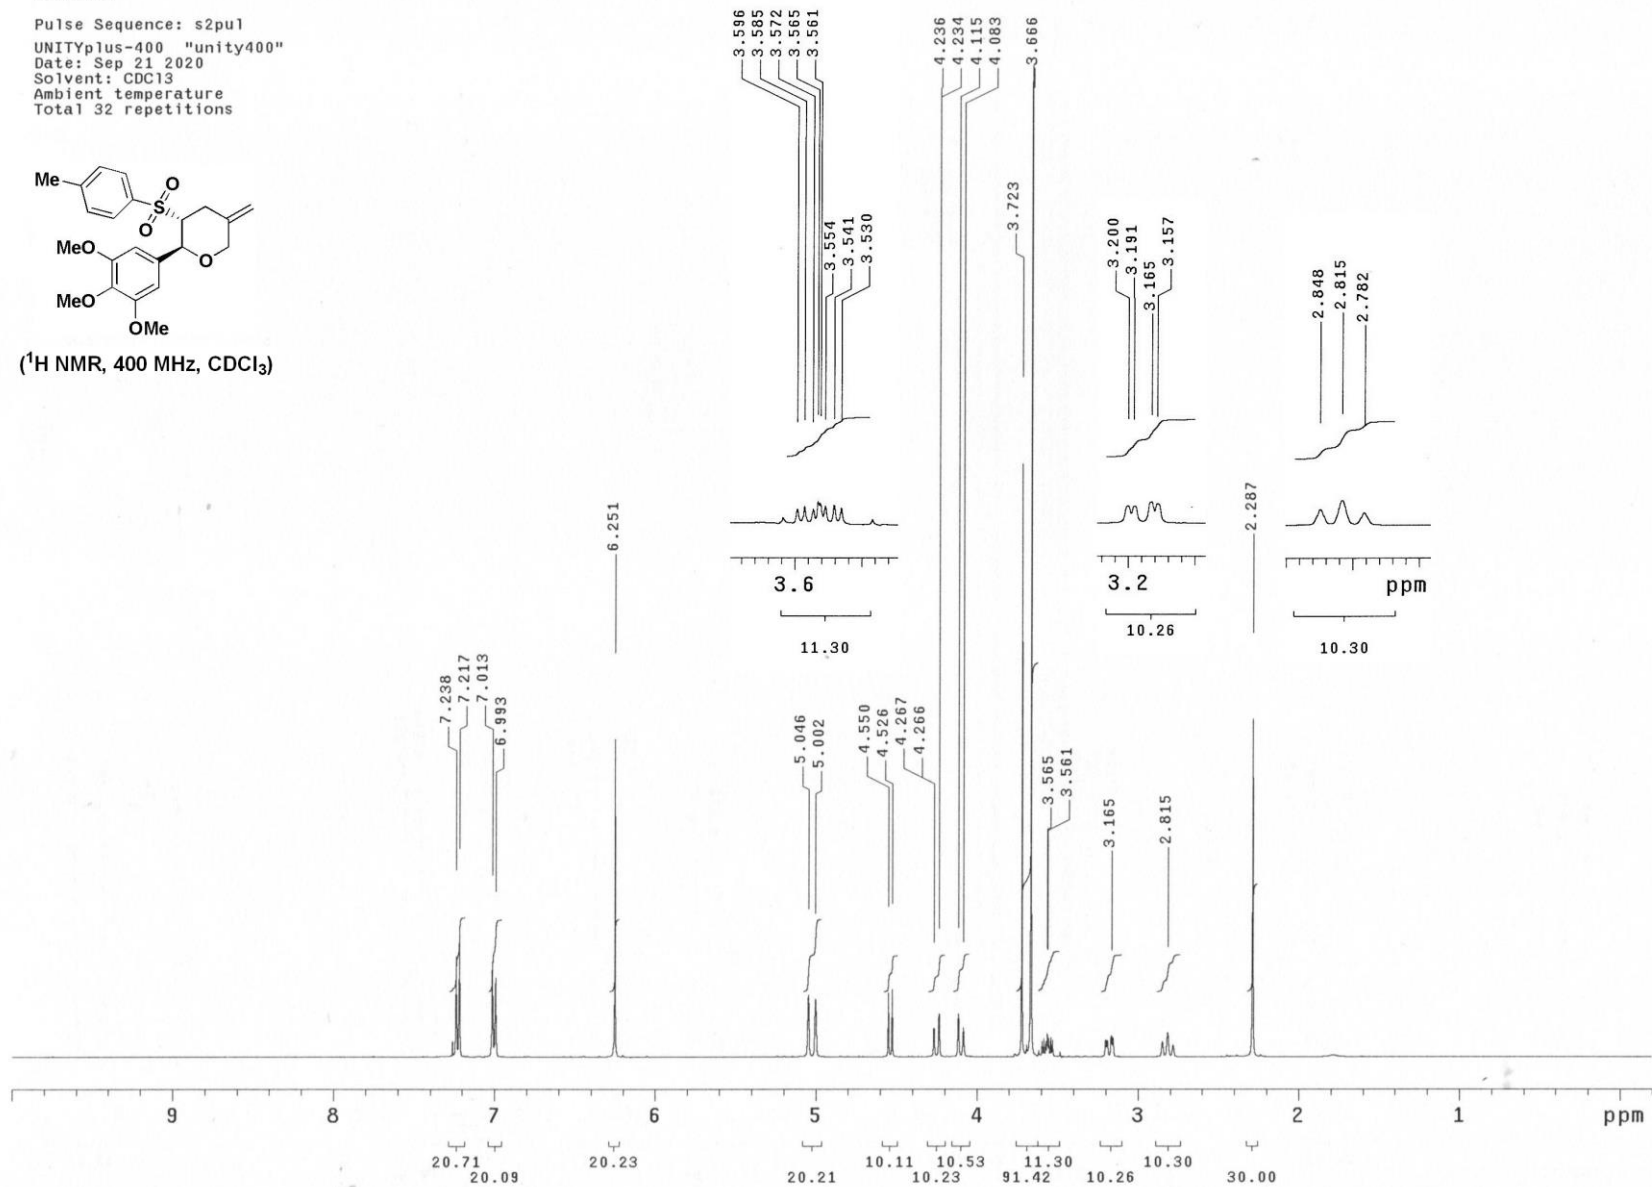



# Compound 5v (<sup>13</sup>C-NMR spectral data)

KT0810NB

Pulse Sequence: s2pu1

UNITYplus-400 "unity400"

Date: Sep 21 2020

Solvent: CDCl<sub>3</sub>

Ambient temperature

Total 720 repetitions

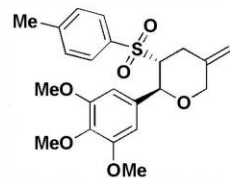

(<sup>13</sup>C NMR, 100 MHz, CDCl<sub>3</sub>)

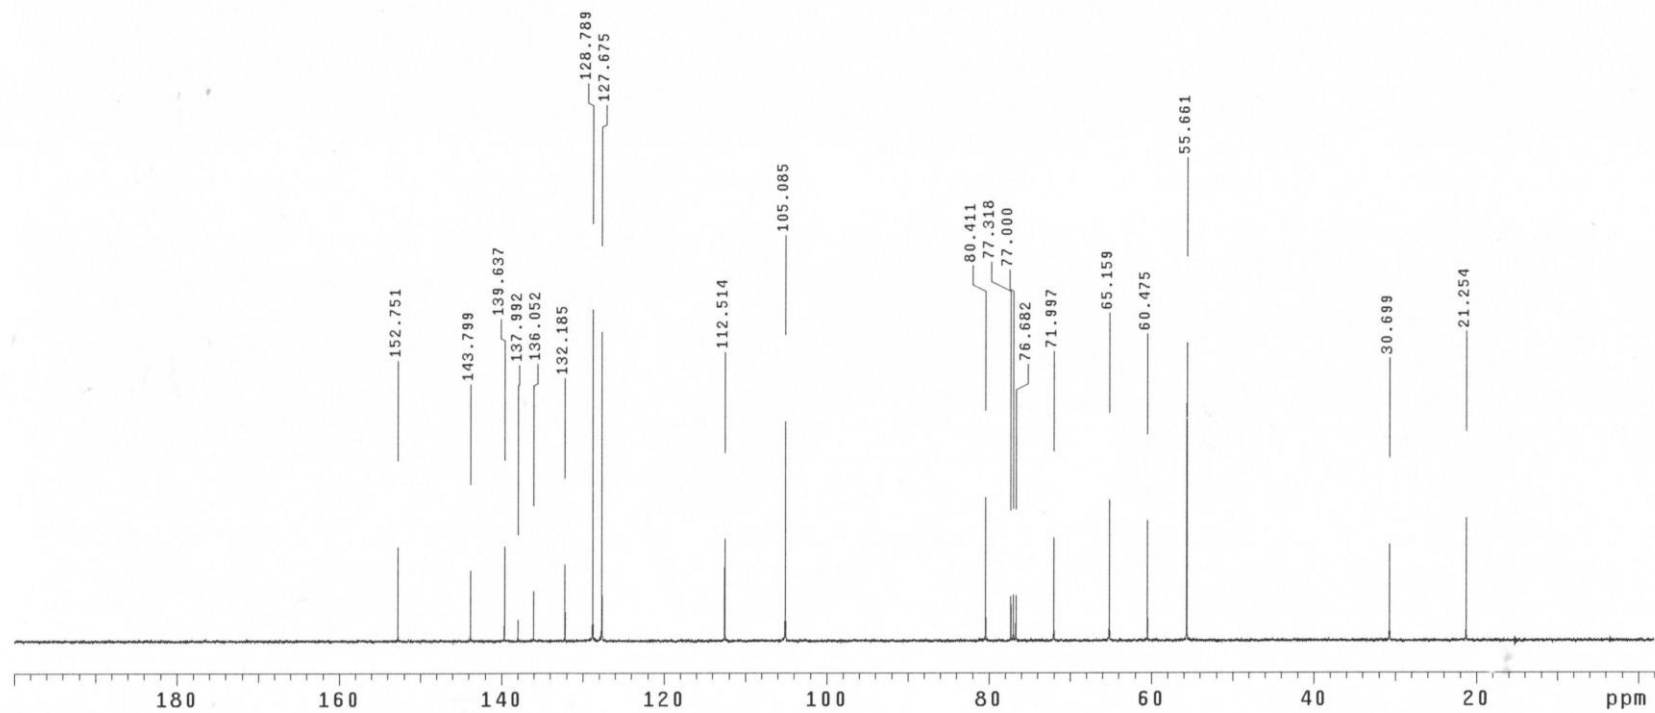

# Compound 5w (<sup>1</sup>H-NMR spectral data)

KT0813NB

Pulse Sequence: s2pu1

UNITYplus-400 "unity400"

Date: Aug 27 2020

Solvent: CDCl<sub>3</sub>

Ambient temperature

Total 32 repetitions

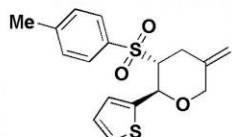

(<sup>1</sup>H NMR, 400 MHz, CDCl<sub>3</sub>)

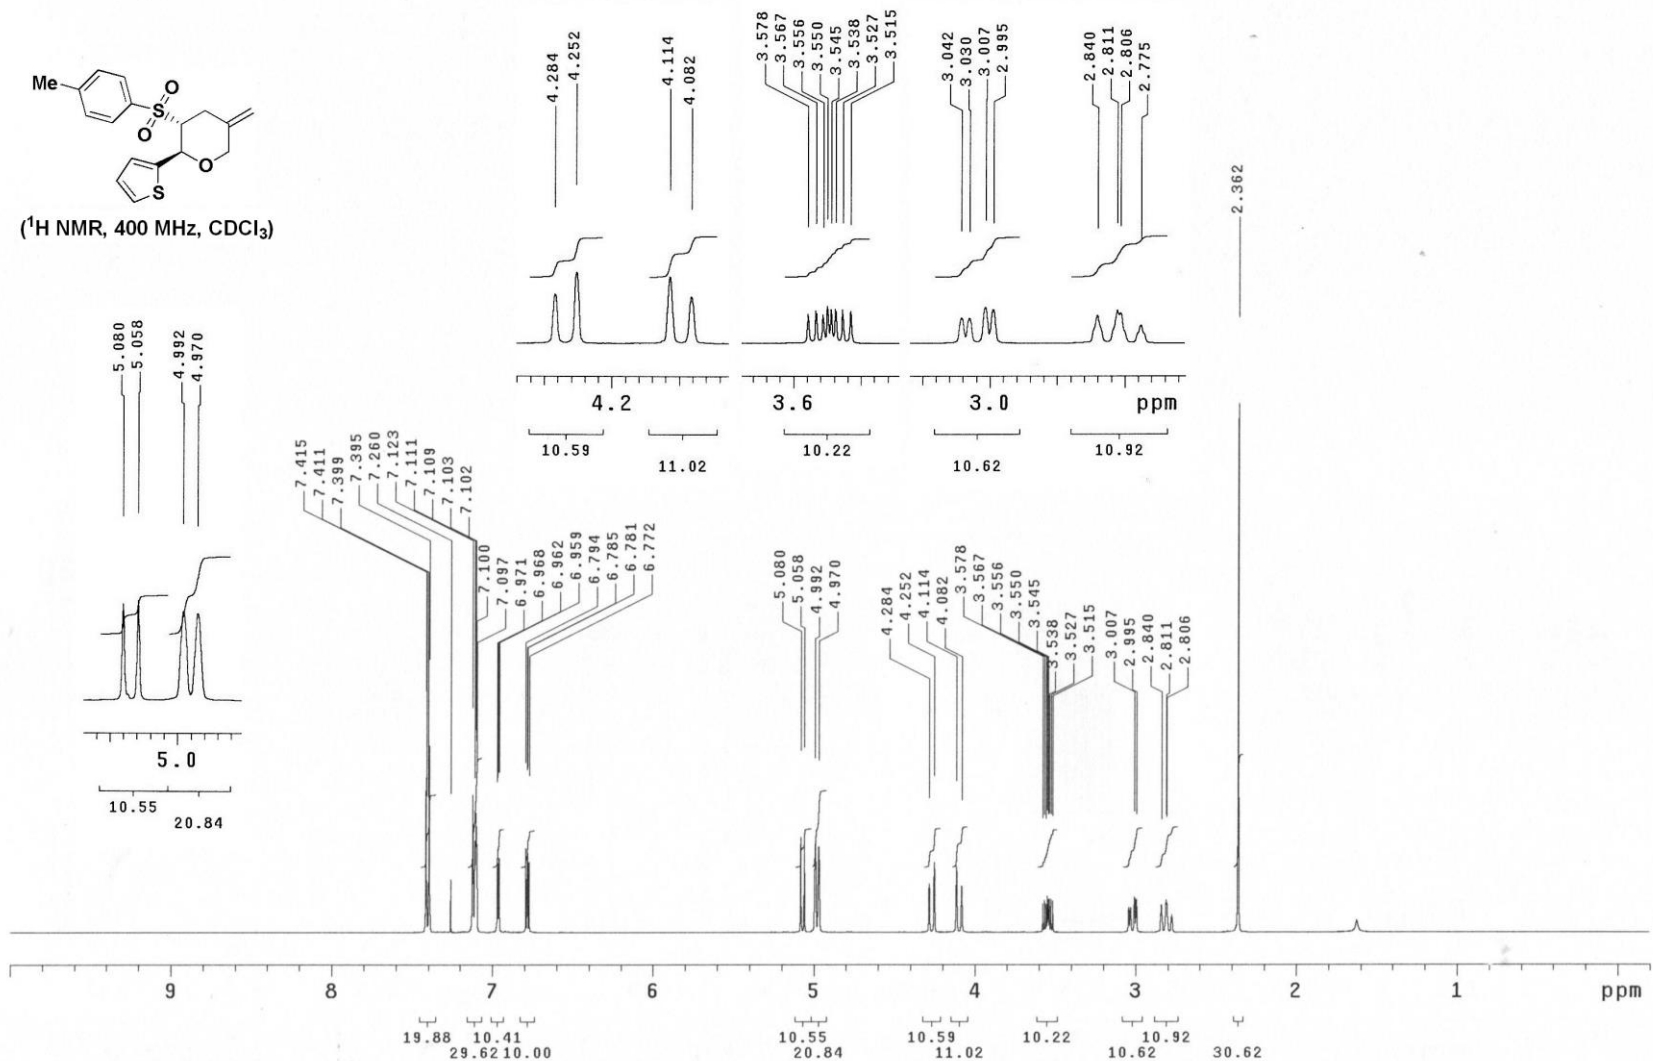

# Compound 5w (<sup>13</sup>C-NMR spectral data)

KT0813NB

Pulse Sequence: s2pu1

UNITYplus-400 "unity400"

Date: Aug 27 2020

Solvent: CDCl<sub>3</sub>

Ambient temperature

Total 576 repetitions

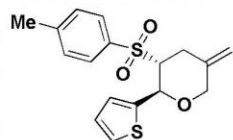

(<sup>13</sup>C NMR, 100 MHz, CDCl<sub>3</sub>)

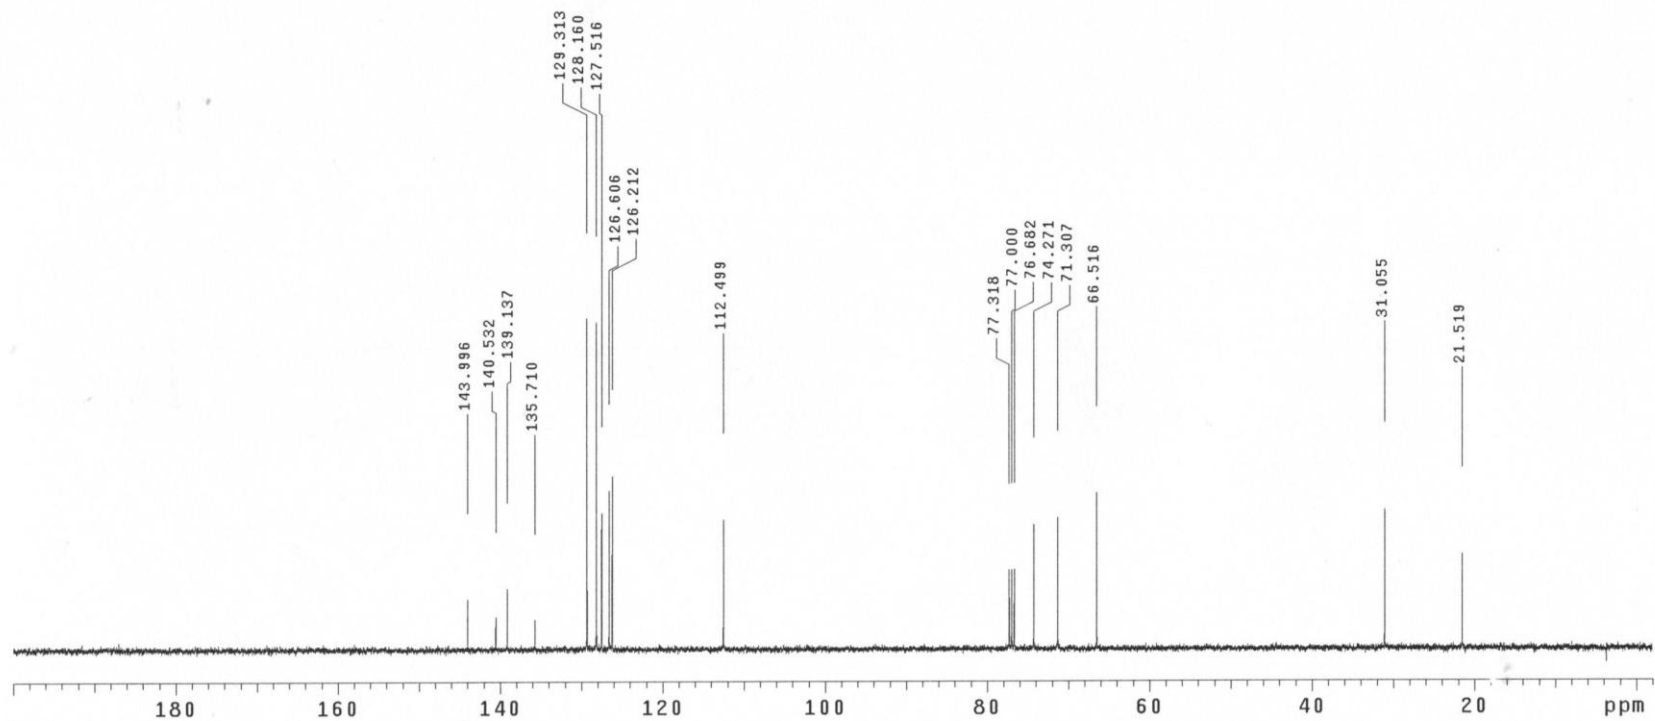

# Compound 7a (<sup>1</sup>H-NMR spectral data)

KT0416

Pulse Sequence: s2pu1

UNITYplus-400 "unity400"

Date: Apr 16 2020

Solvent: CDCl<sub>3</sub>

Ambient temperature

Total 64 repetitions

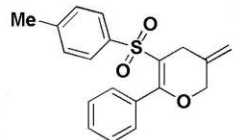

(<sup>1</sup>H NMR, 400 MHz, CDCl<sub>3</sub>)

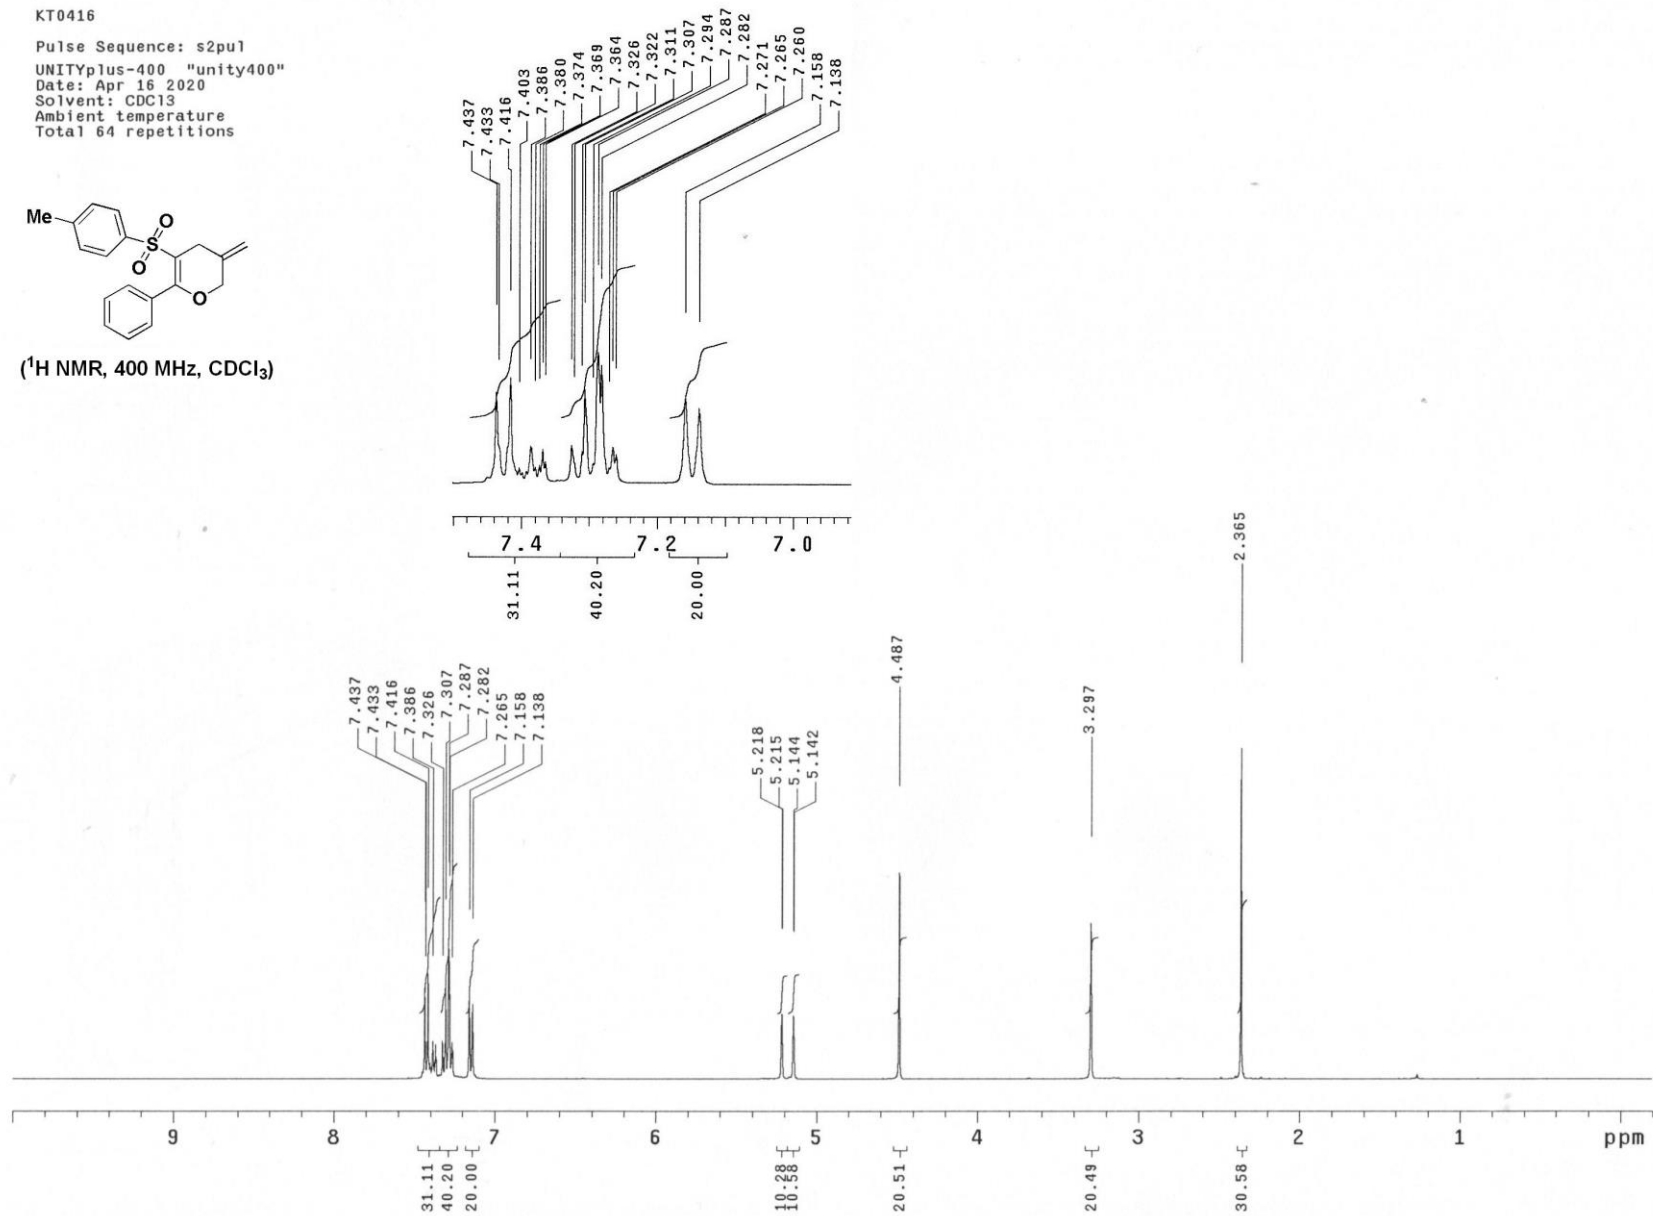

# Compound 7a (<sup>13</sup>C-NMR spectral data)

KT0416

Pulse Sequence: s2pu1  
UNITYplus-400 "unity400"  
Date: Apr 16 2020  
Solvent: CDCl<sub>3</sub>  
Ambient temperature  
Total 800 repetitions

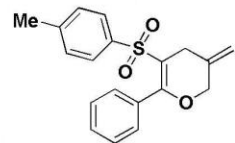

(<sup>13</sup>C NMR, 100 MHz, CDCl<sub>3</sub>)

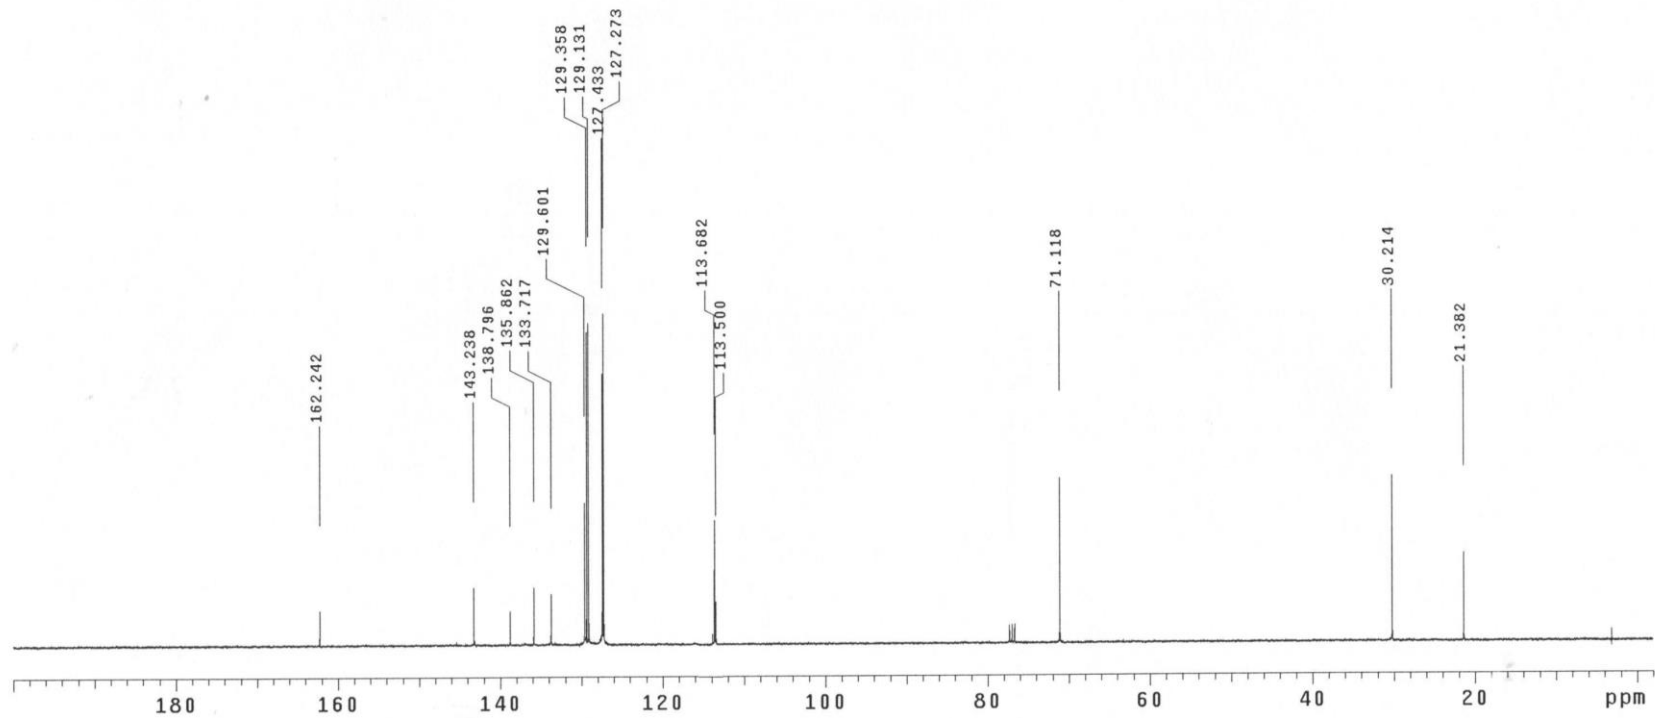

# Compound 7b (<sup>1</sup>H-NMR spectral data)

KT0506-6

Pulse Sequence: s2pu1

UNITYplus-400 "unity400"

Date: May 12 2020

Solvent: CDCl<sub>3</sub>

Ambient temperature

Total 32 repetitions

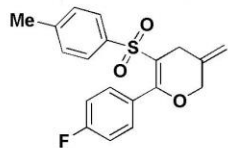

(<sup>1</sup>H NMR, 400 MHz, CDCl<sub>3</sub>)

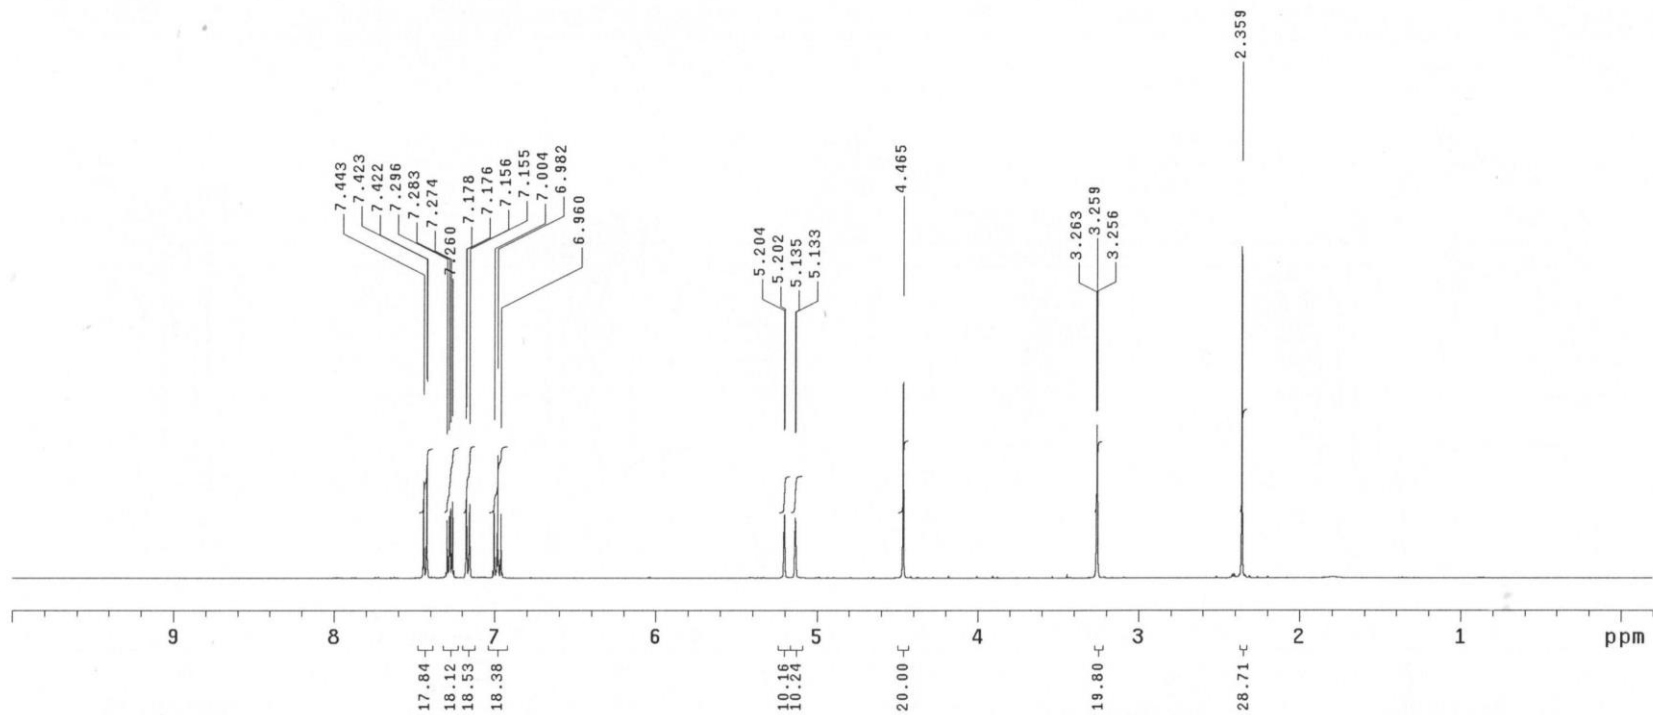

# Compound 7b (<sup>13</sup>C-NMR spectral data)

KT0506-6

Pulse Sequence: s2pu1

UNITYplus-400 "unity400"

Date: May 12 2020

Solvent: CDCl<sub>3</sub>

Ambient temperature

Total 240 repetitions

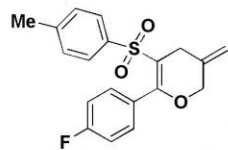

(<sup>13</sup>C NMR, 100 MHz, CDCl<sub>3</sub>)

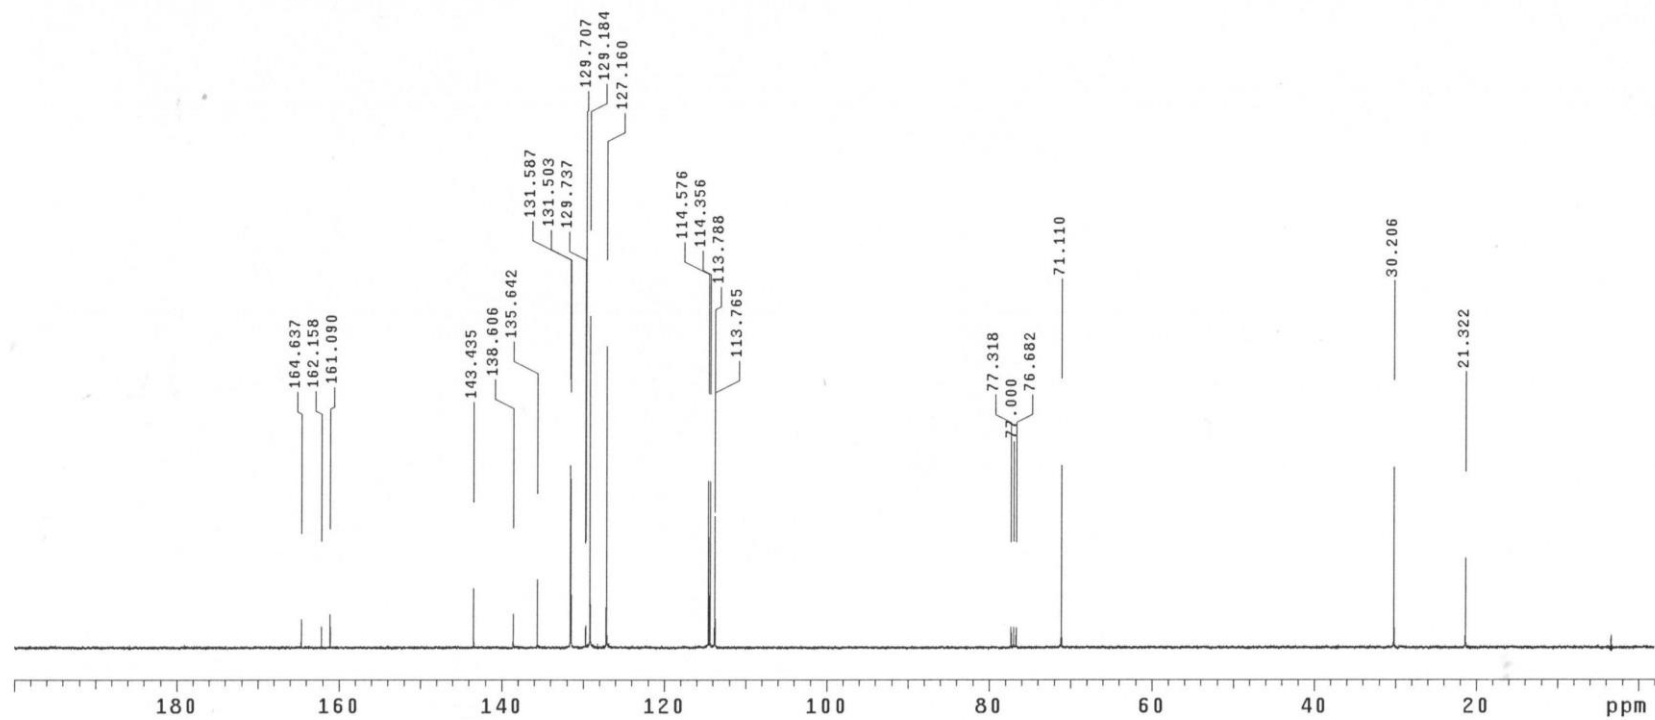

# Compound 7c (<sup>1</sup>H-NMR spectral data)

KT0423

Pulse Sequence: s2pu1  
UNITYplus-400 "unity400"  
Date: Apr 23 2020  
Solvent: CDCl<sub>3</sub>  
Ambient temperature  
Total 32 repetitions

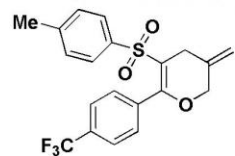

(<sup>1</sup>H NMR, 400 MHz, CDCl<sub>3</sub>)

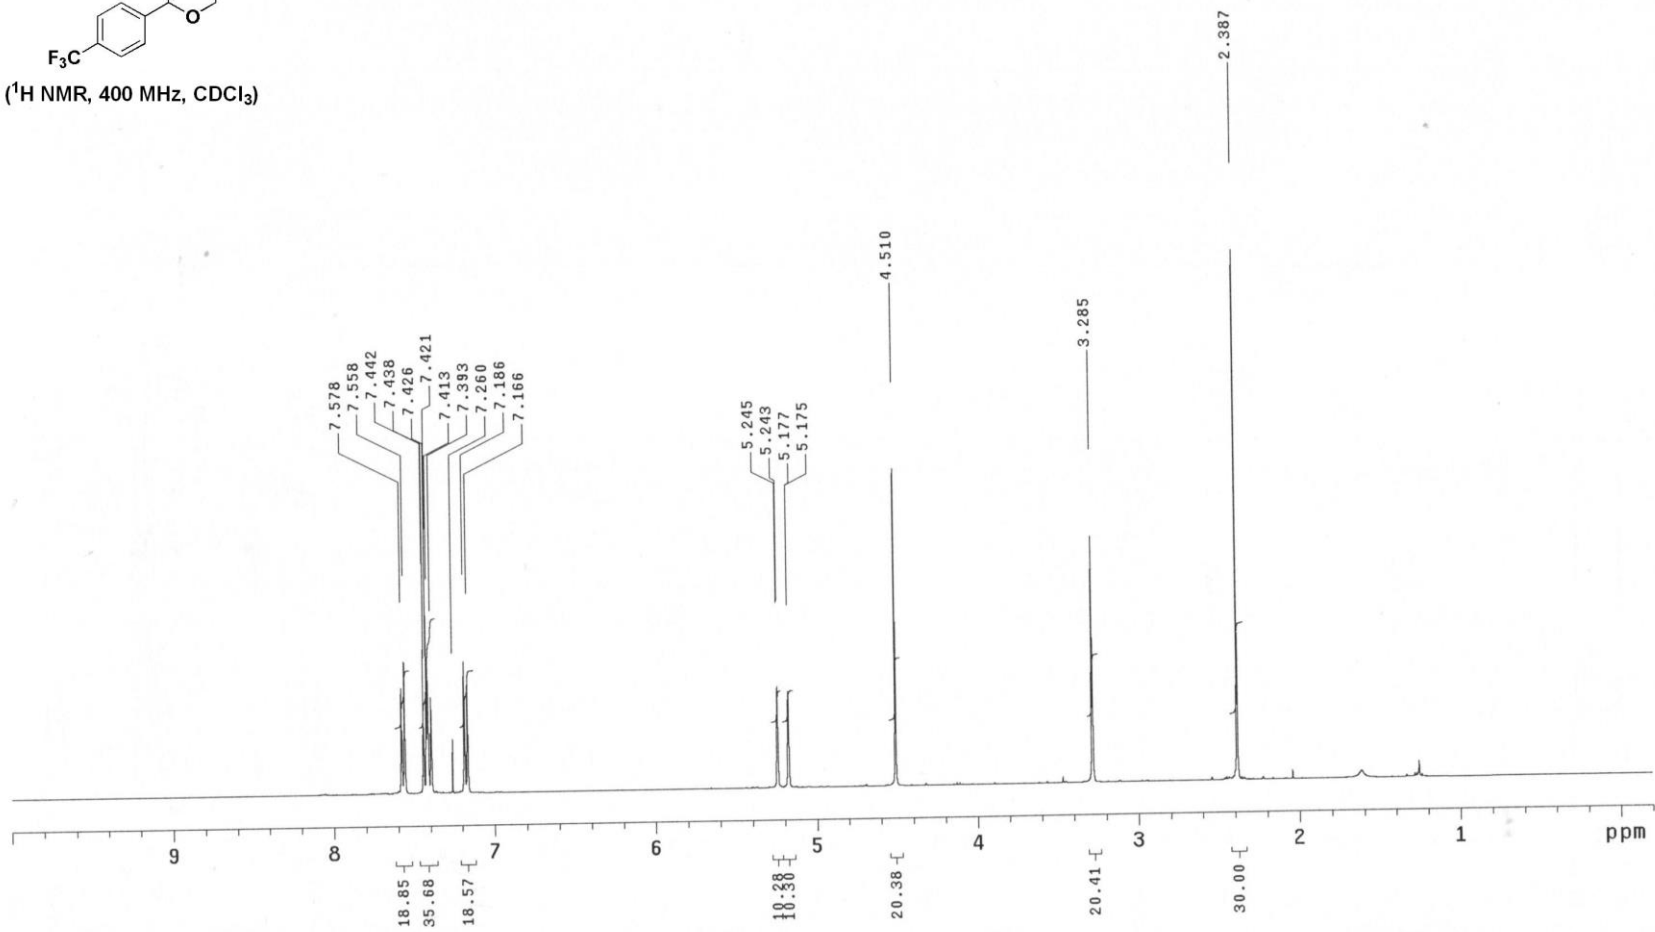



# Compound 7c ( $^{13}\text{C}$ -NMR spectral data)

KT0423

Pulse Sequence: s2pu1  
UNITYplus-400 "unity400"  
Date: Apr 23 2020  
Solvent:  $\text{CDCl}_3$   
Ambient temperature  
Total 1616 repetitions

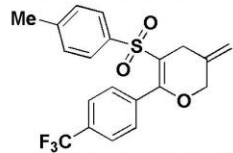

( $^{13}\text{C}$  NMR, 100 MHz,  $\text{CDCl}_3$ )

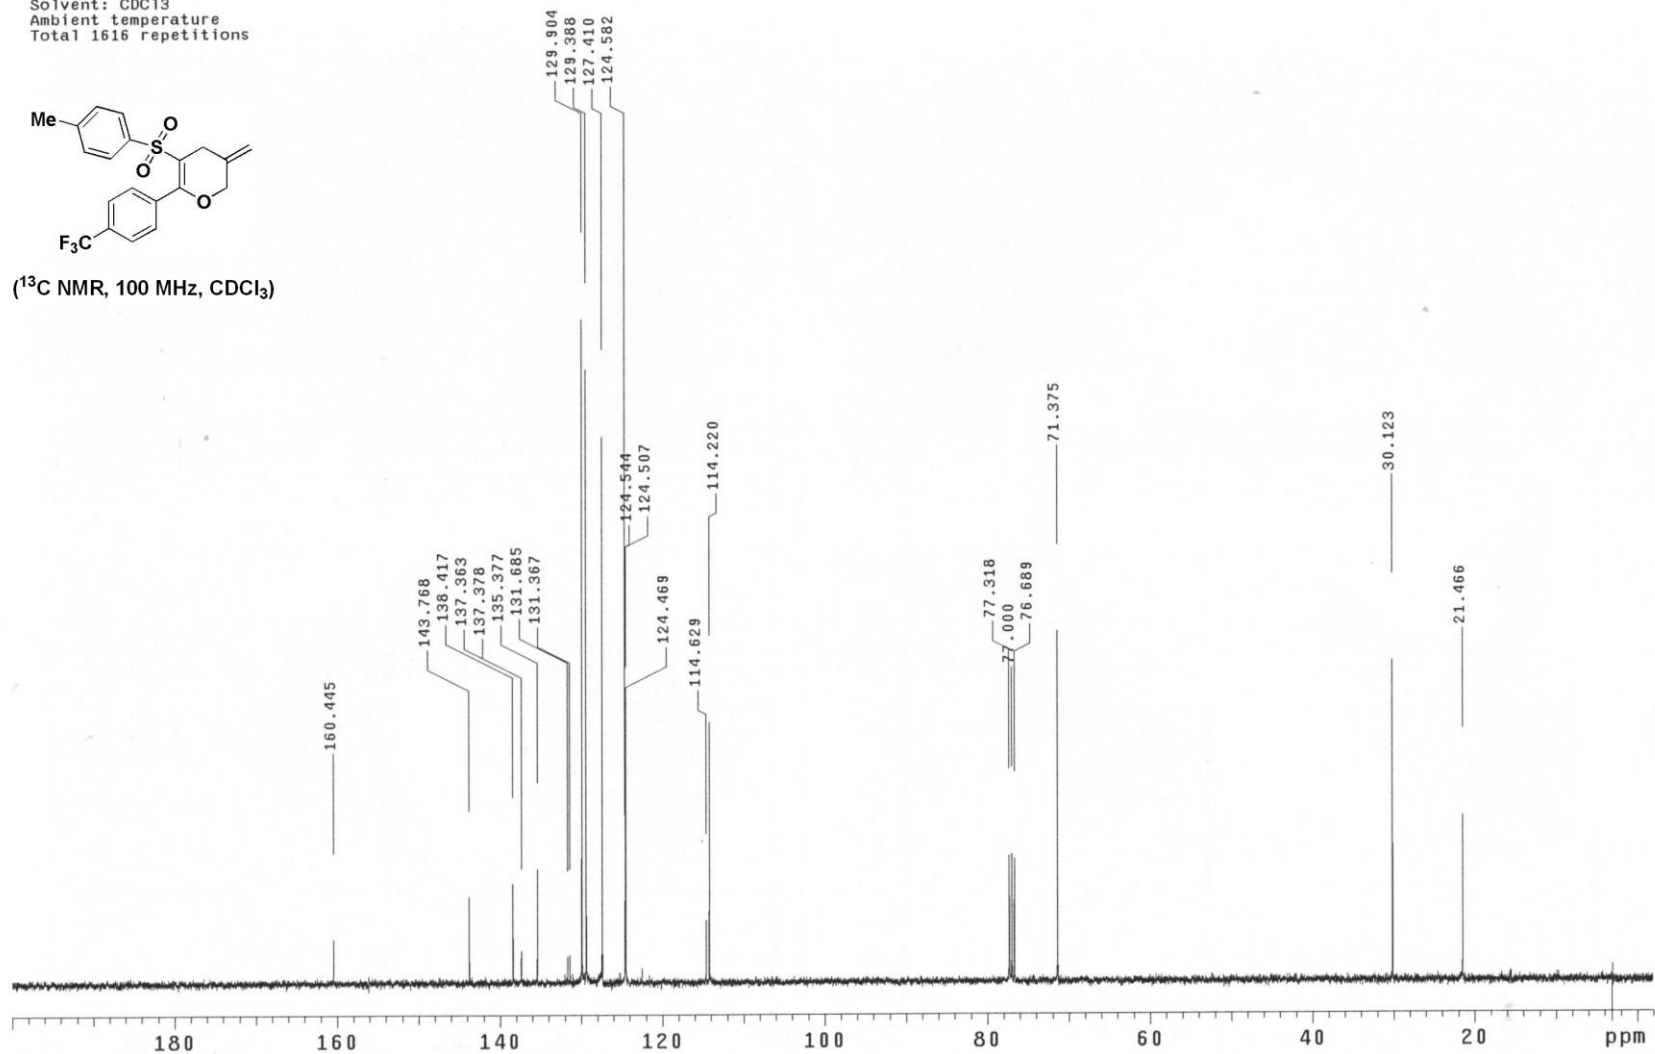

# Compound 7d (<sup>1</sup>H-NMR spectral data)

KT0526-6

Pulse Sequence: s2pu1  
UNITYplus-400 "unity400"  
Date: May 26 2020  
Solvent: CDCl<sub>3</sub>  
Ambient temperature  
Total 32 repetitions

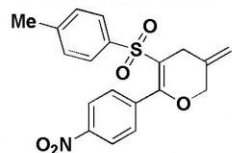

(<sup>1</sup>H NMR, 400 MHz, CDCl<sub>3</sub>)

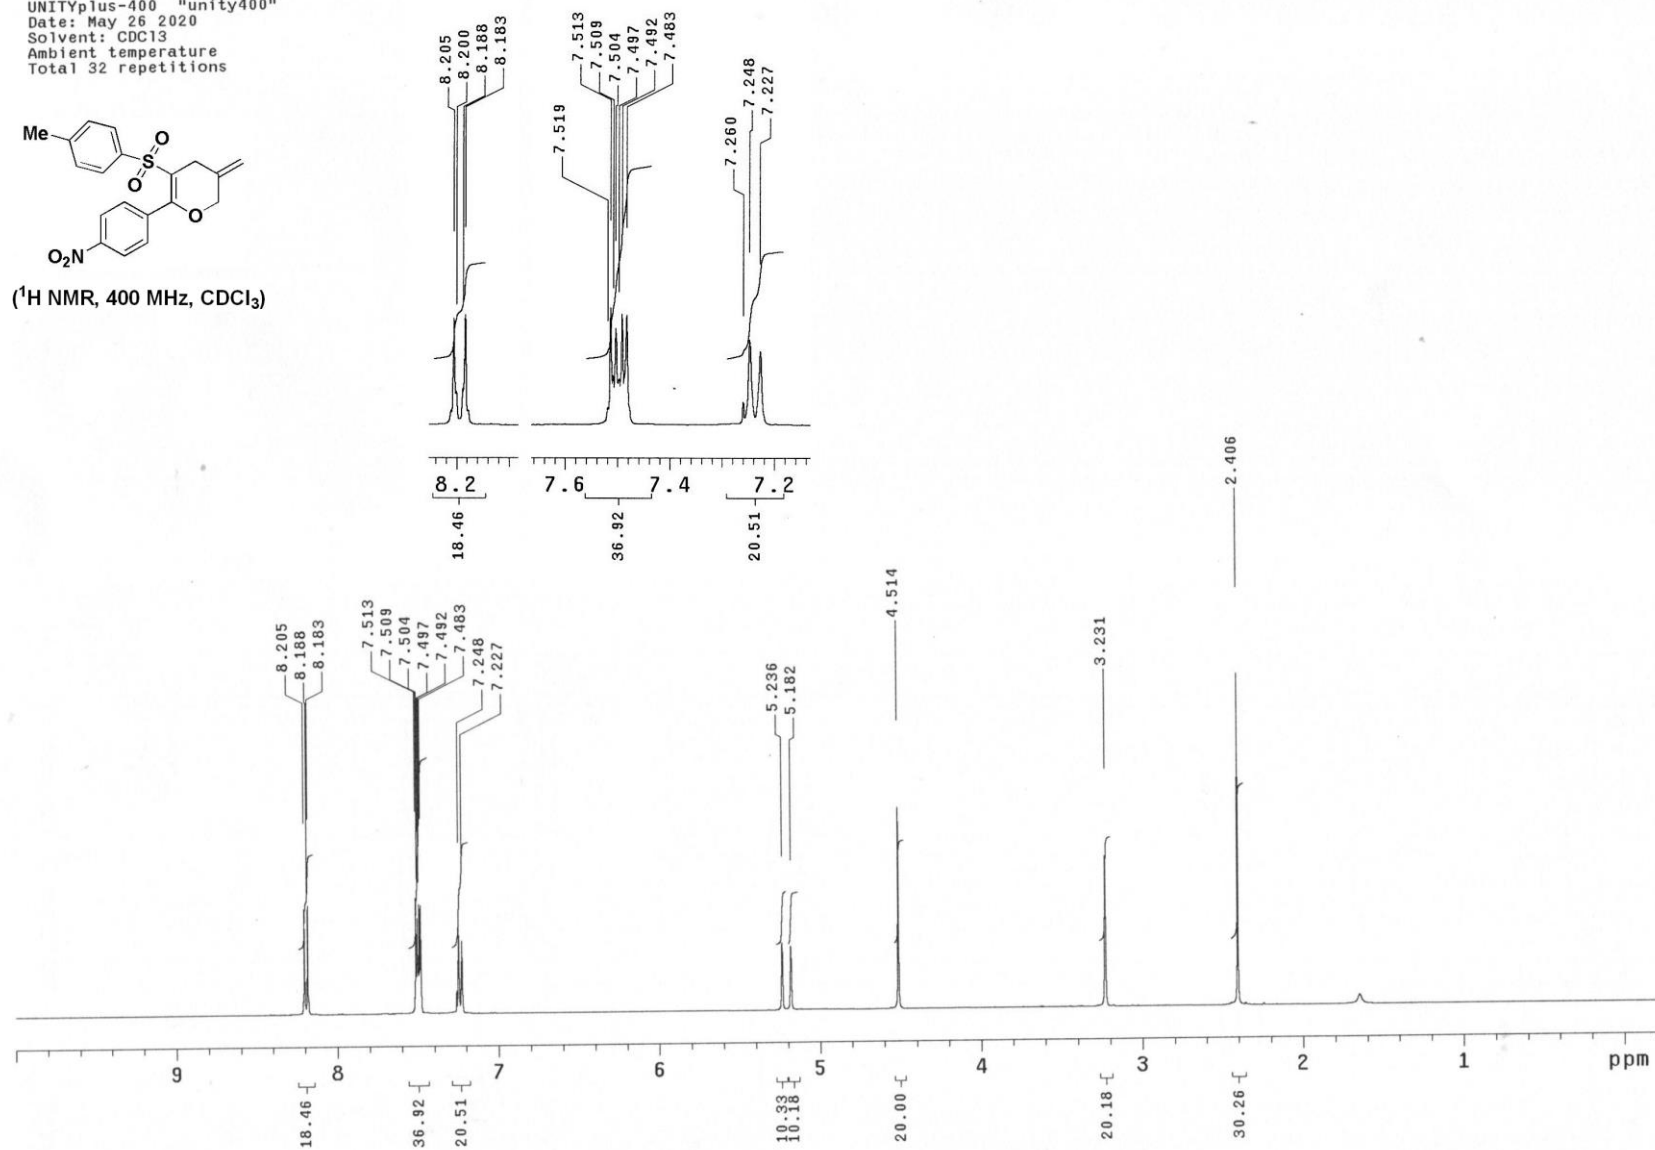

# Compound 7d (<sup>13</sup>C-NMR spectral data)

KT0526-6

Pulse Sequence: s2pu1  
UNITYplus-400 "unity400"  
Date: May 26 2020  
Solvent: CDCl<sub>3</sub>  
Ambient temperature  
Total 640 repetitions

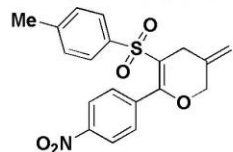

(<sup>13</sup>C NMR, 100 MHz, CDCl<sub>3</sub>)

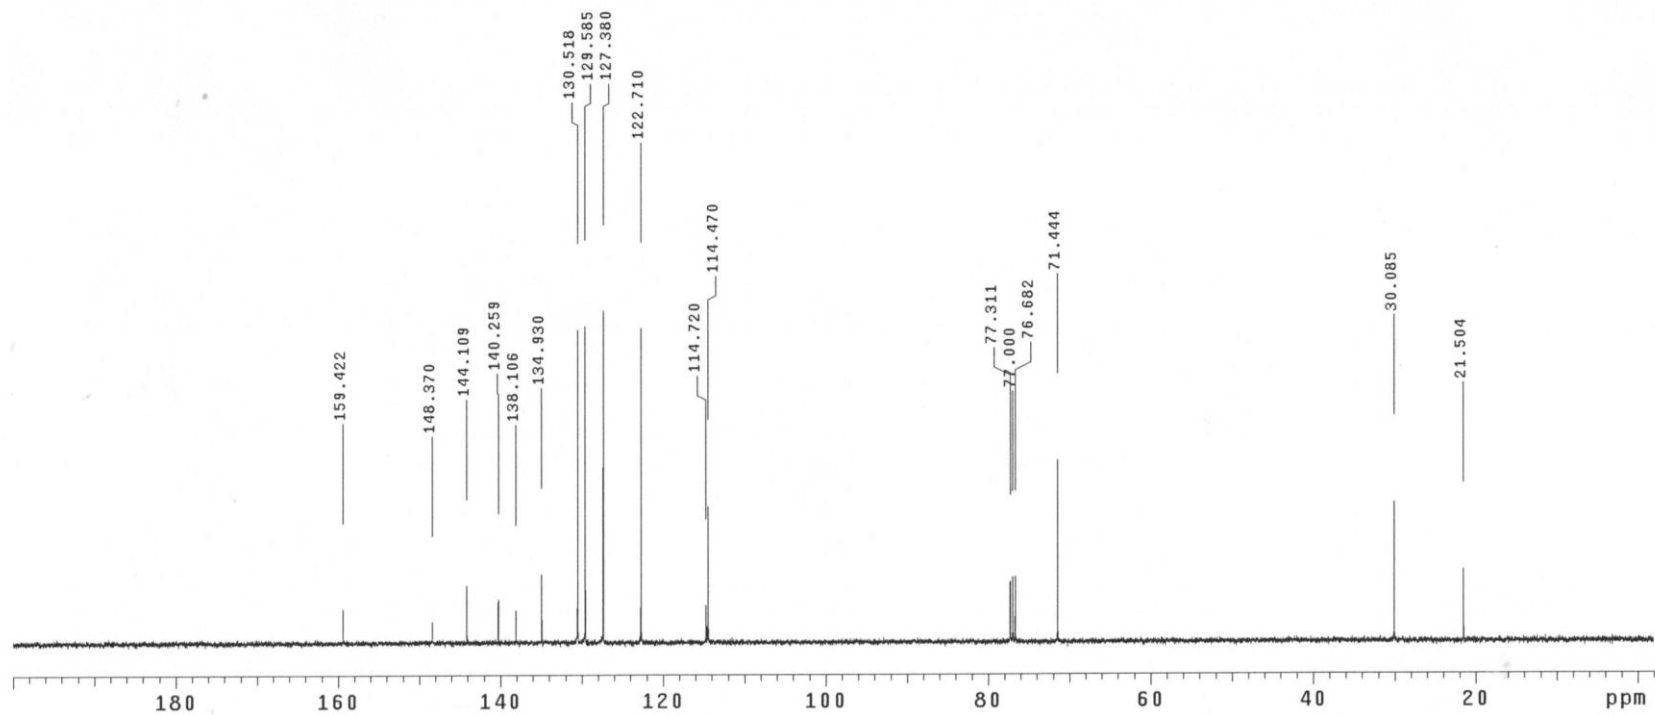

# Compound 7e (<sup>1</sup>H-NMR spectral data)

KT0804-6

Pulse Sequence: s2pu1

UNITYplus-400 "unity400"

Date: Aug 5 2020

Solvent: CDCl<sub>3</sub>

Ambient temperature

Total 32 repetitions

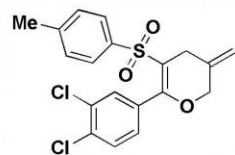

(<sup>1</sup>H NMR, 400 MHz, CDCl<sub>3</sub>)

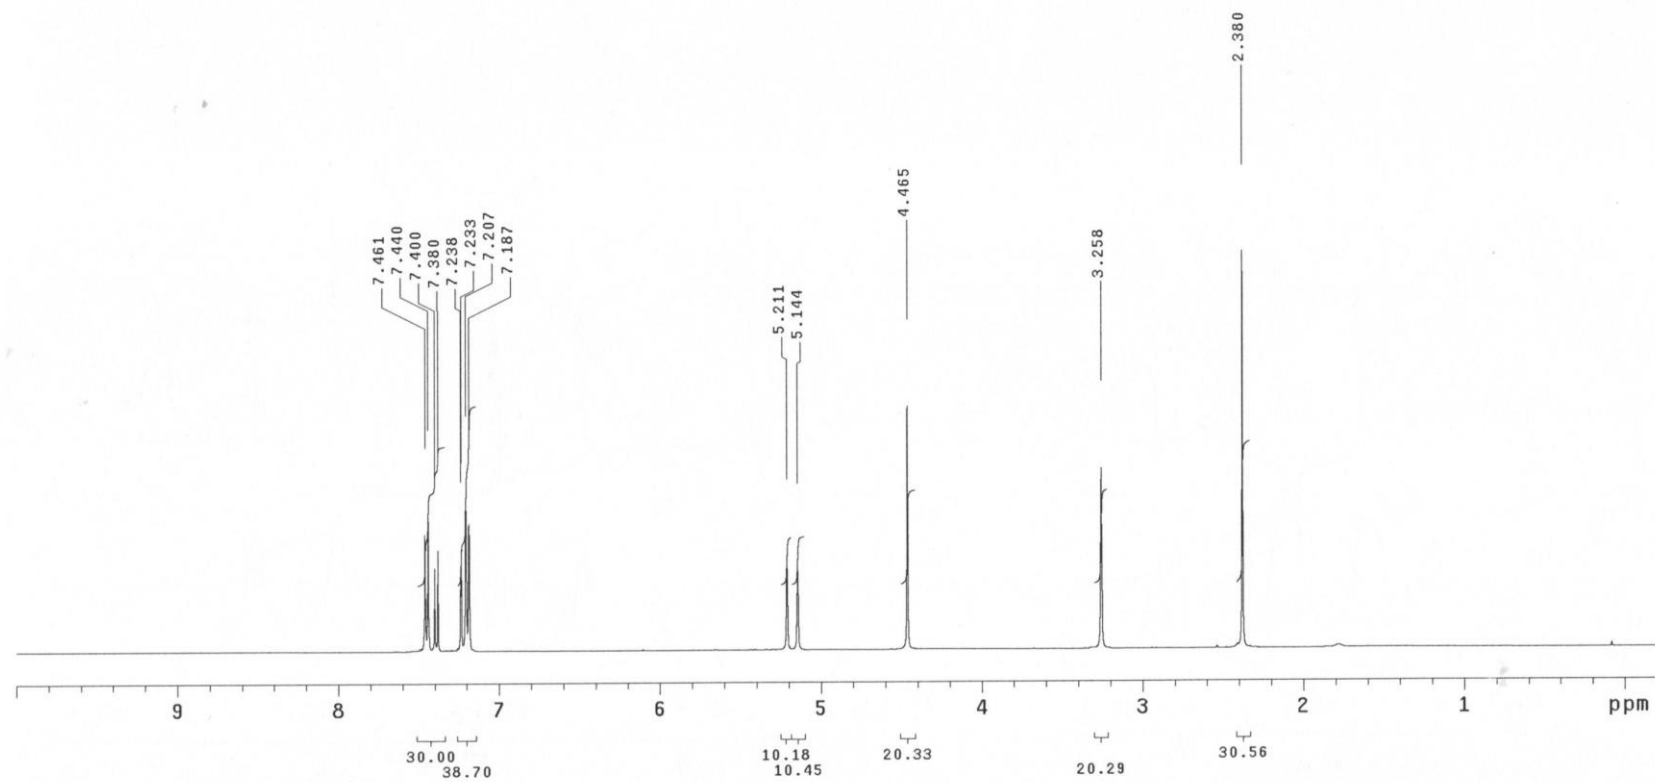

# Compound 7e (<sup>13</sup>C-NMR spectral data)

KT0804-6

Pulse Sequence: s2pu1

UNITYplus-400 "unity400"

Date: Aug 5 2020

Solvent: CDCl<sub>3</sub>

Ambient temperature

Total 112 repetitions

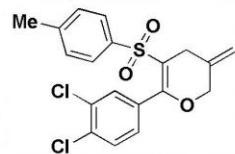

(<sup>13</sup>C NMR, 100 MHz, CDCl<sub>3</sub>)

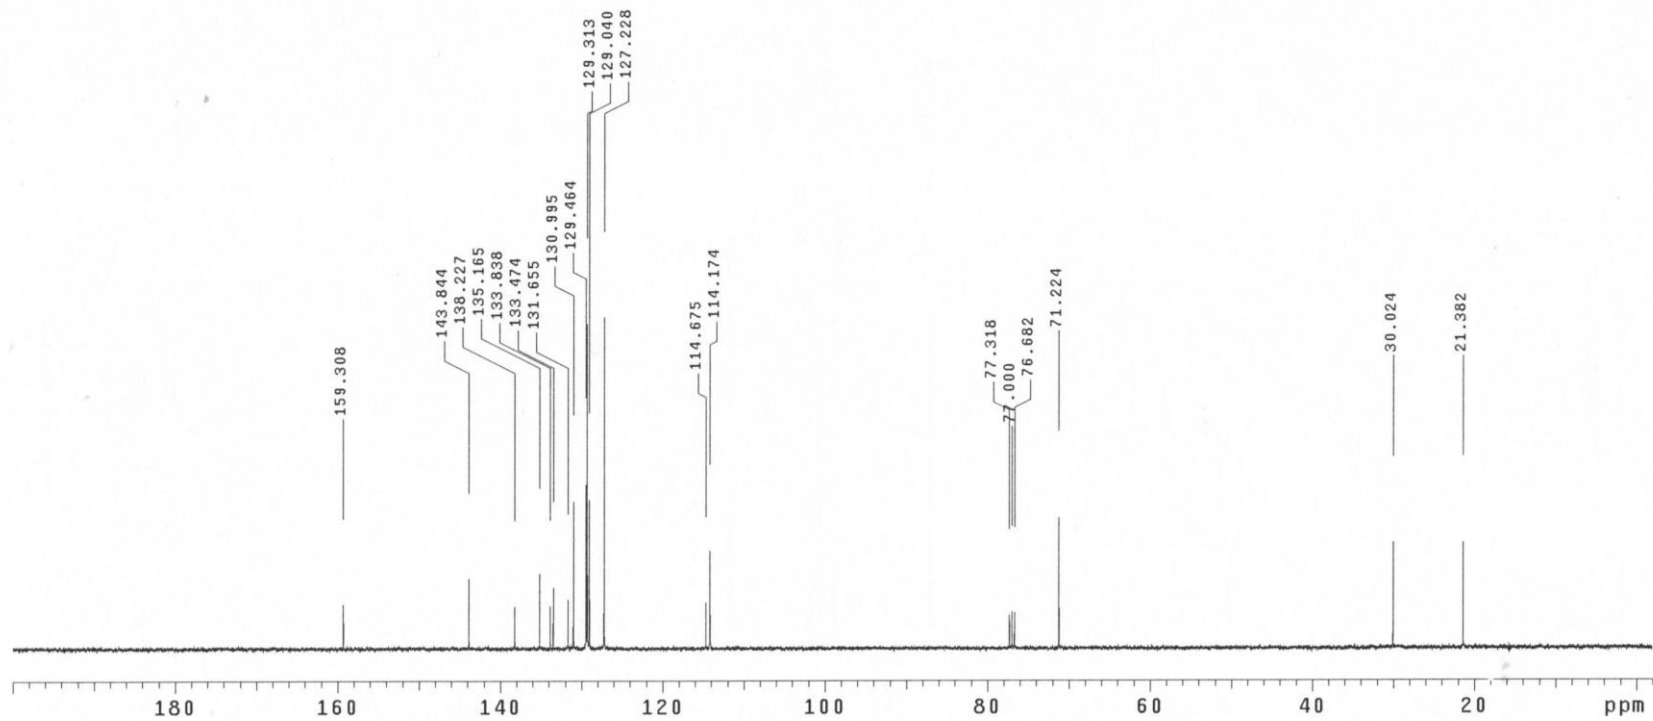

# Compound 8 (<sup>1</sup>H-NMR spectral data)

KT1090519-1

Pulse Sequence: s2pu1

UNITYplus-400 "unity400"

Date: May 19 2020

Solvent: CDCl<sub>3</sub>

Ambient temperature

Total 32 repetitions

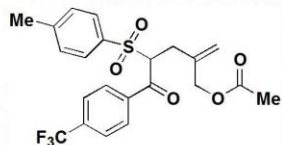

(<sup>1</sup>H NMR, 400 MHz, CDCl<sub>3</sub>)

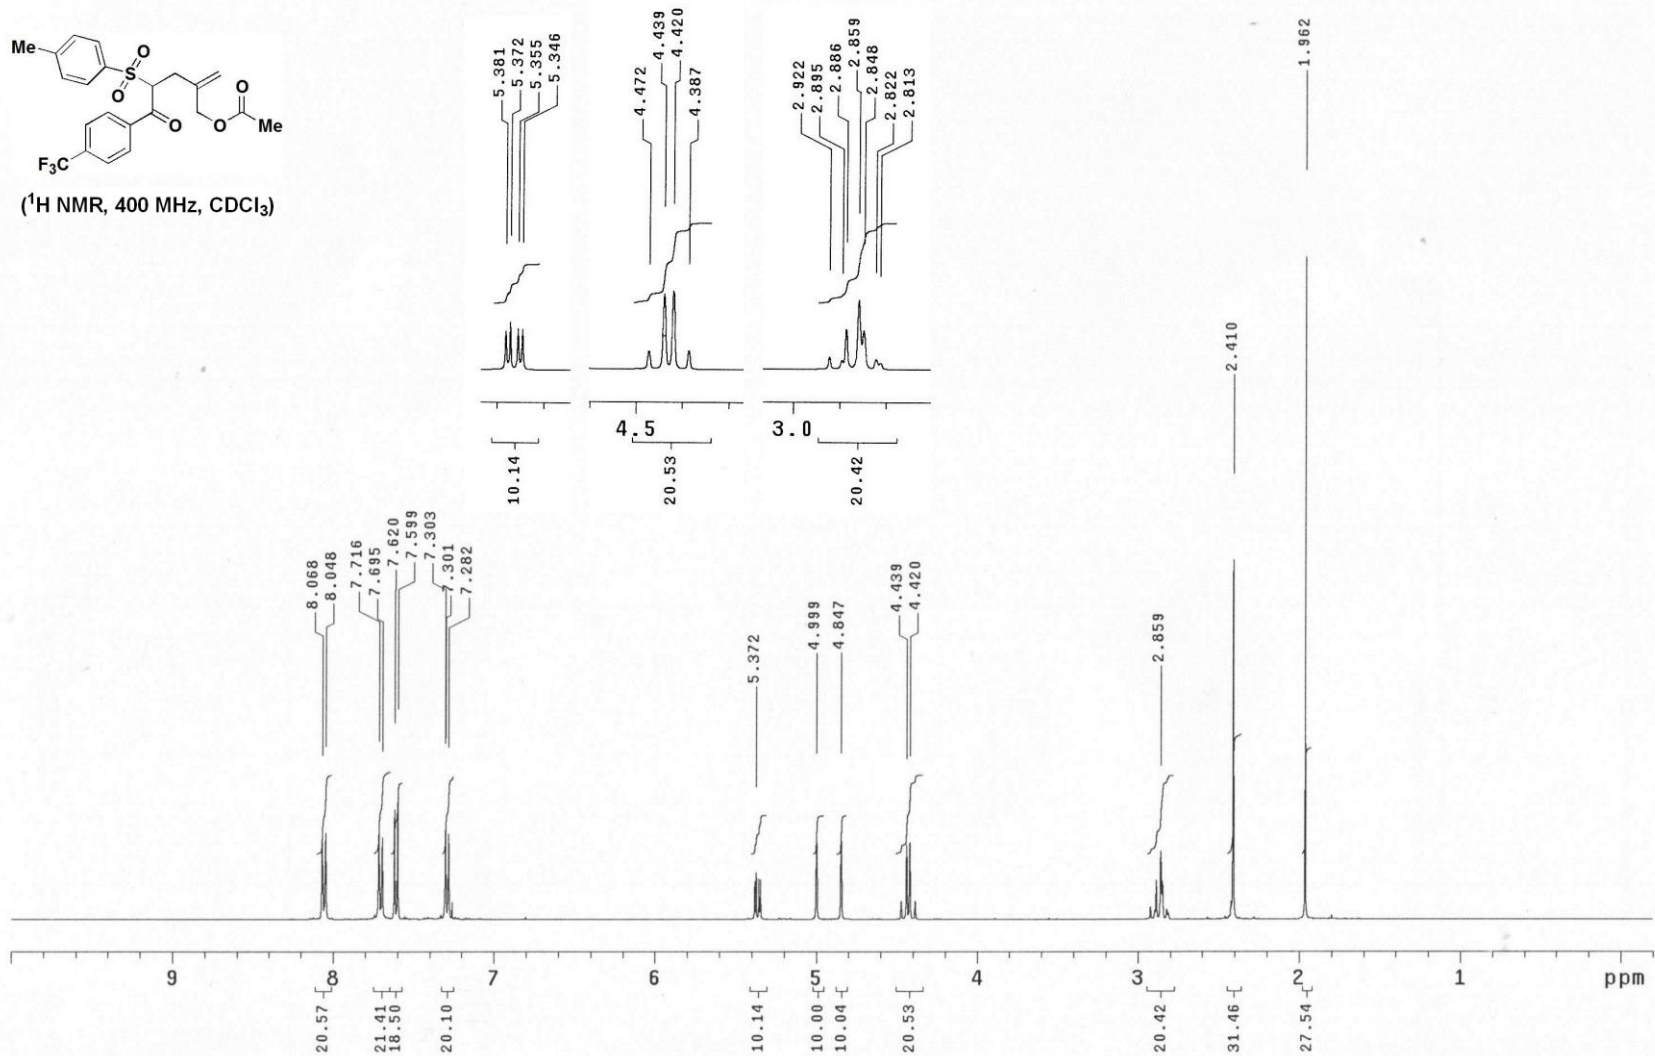

# Compound 8 (<sup>13</sup>C-NMR spectral data)

KT1090519-1

Pulse Sequence: s2pu1

UNITYplus-400 "unity400"

Date: May 19 2020

Solvent: CDCl<sub>3</sub>

Ambient temperature

Total 1536 repetitions

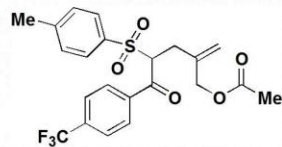

(<sup>13</sup>C NMR, 100 MHz, CDCl<sub>3</sub>)

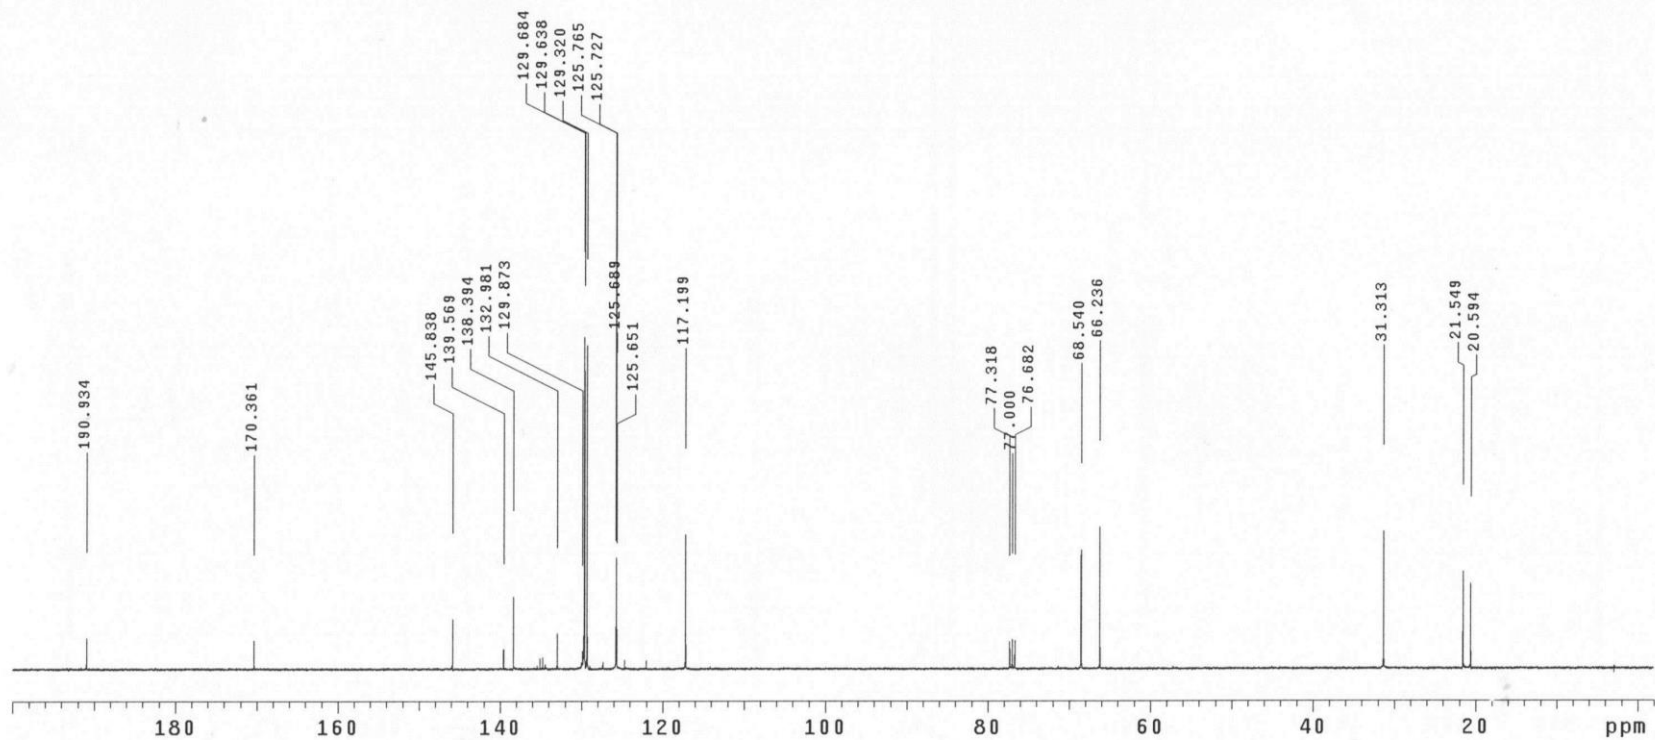

# Compound 9 (<sup>1</sup>H-NMR spectral data)

KT0505NB-1

Pulse Sequence: s2pu1

UNITYplus-400 "unity400"

Date: May 19 2020

Solvent: CDCl<sub>3</sub>

Ambient temperature

Total 64 repetitions

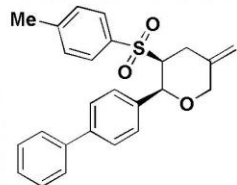

(<sup>1</sup>H NMR, 400 MHz, CDCl<sub>3</sub>)

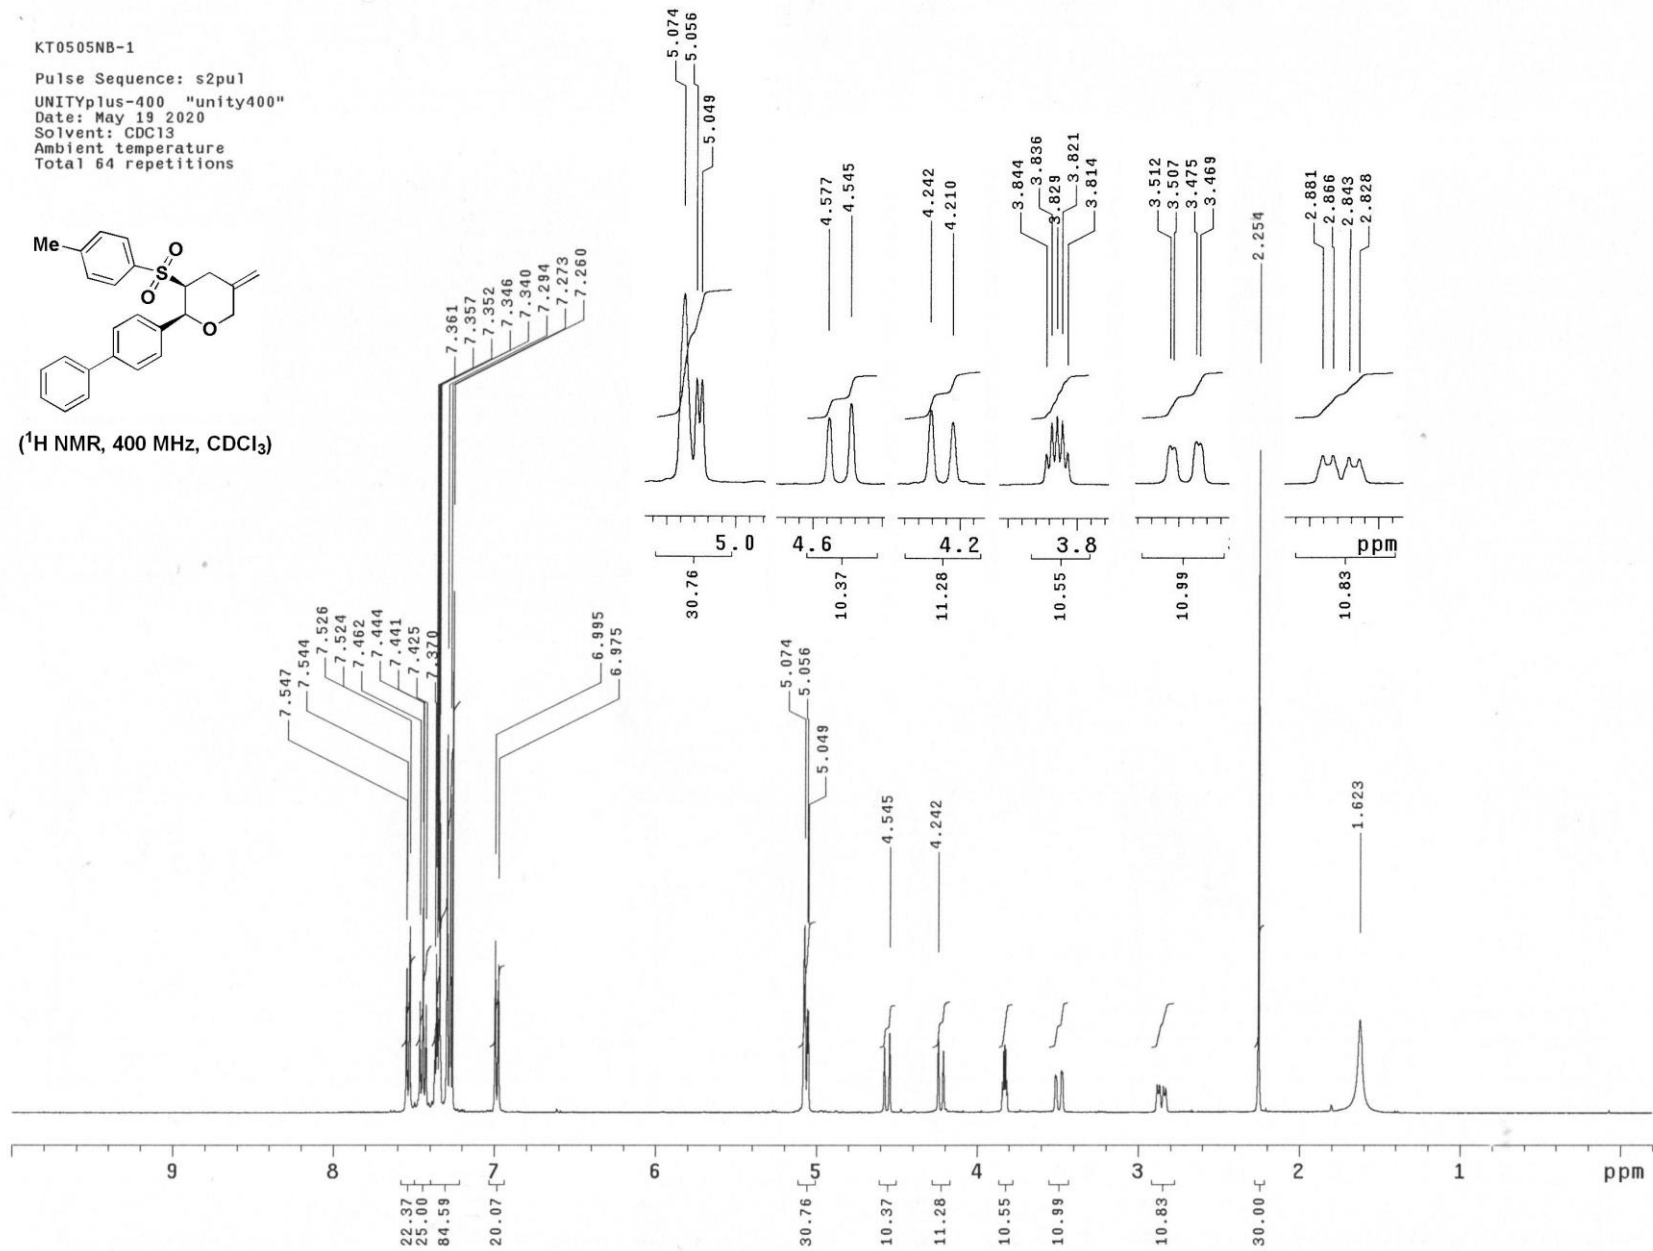



# Compound 9 (<sup>13</sup>C-NMR spectral data)

KT0505NB-1

Pulse Sequence: s2pu1

UNITYplus-400 "unity400"

Date: May 19 2020

Solvent: CDCl<sub>3</sub>

Ambient temperature

Total 11968 repetitions

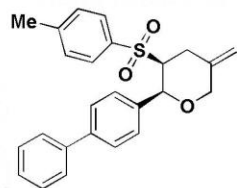

(<sup>13</sup>C NMR, 100 MHz, CDCl<sub>3</sub>)

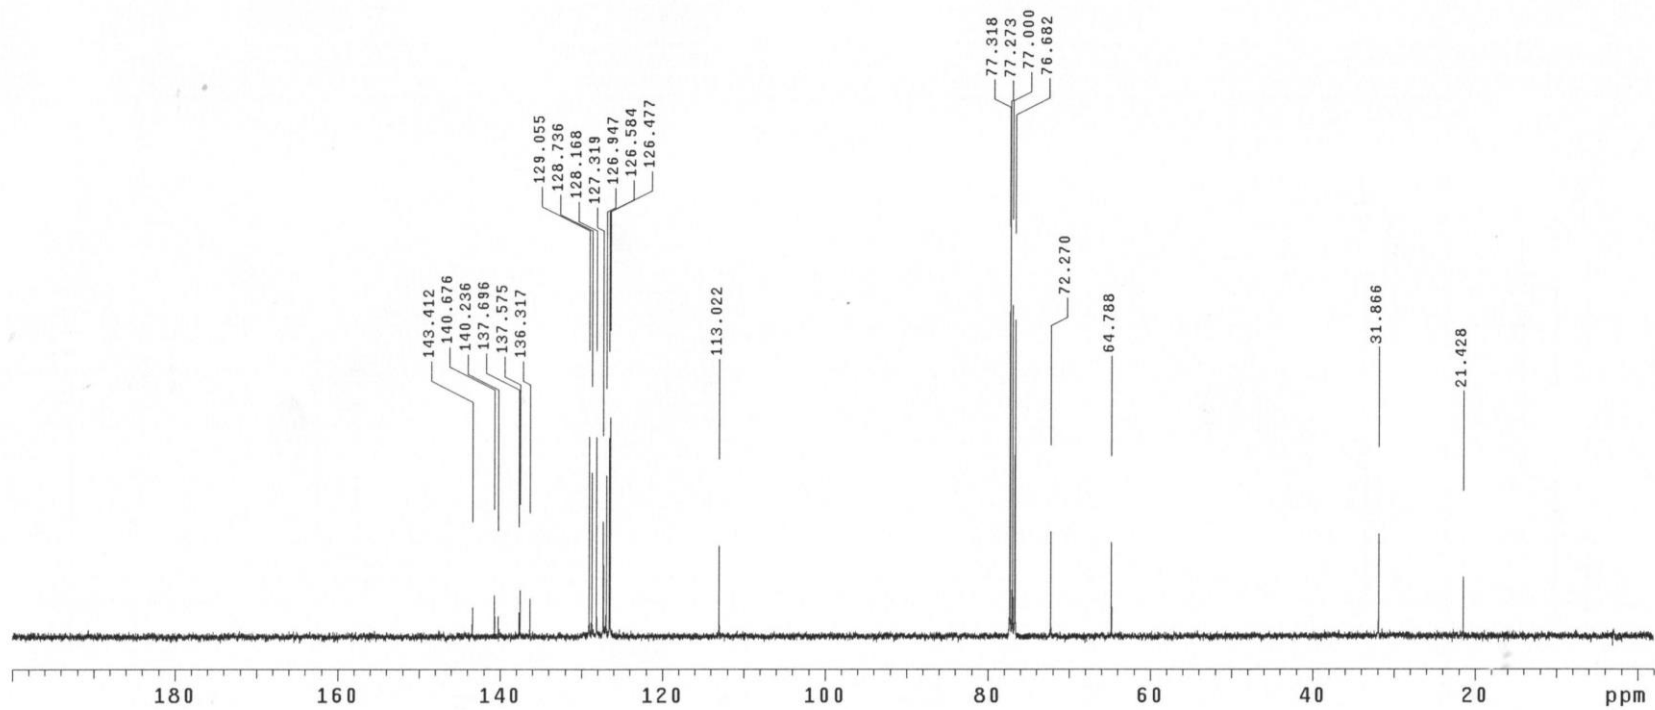

# Compound 11 (<sup>1</sup>H-NMR spectral data)

PS1030

Pulse Sequence: s2pu1

UNITYplus-400 "unity400"

Date: Oct 30 2020

Solvent: CDC13

Ambient temperature

Total 32 repetitions

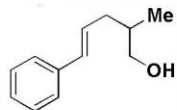

(<sup>1</sup>H NMR, 400 MHz, CDCl<sub>3</sub>)

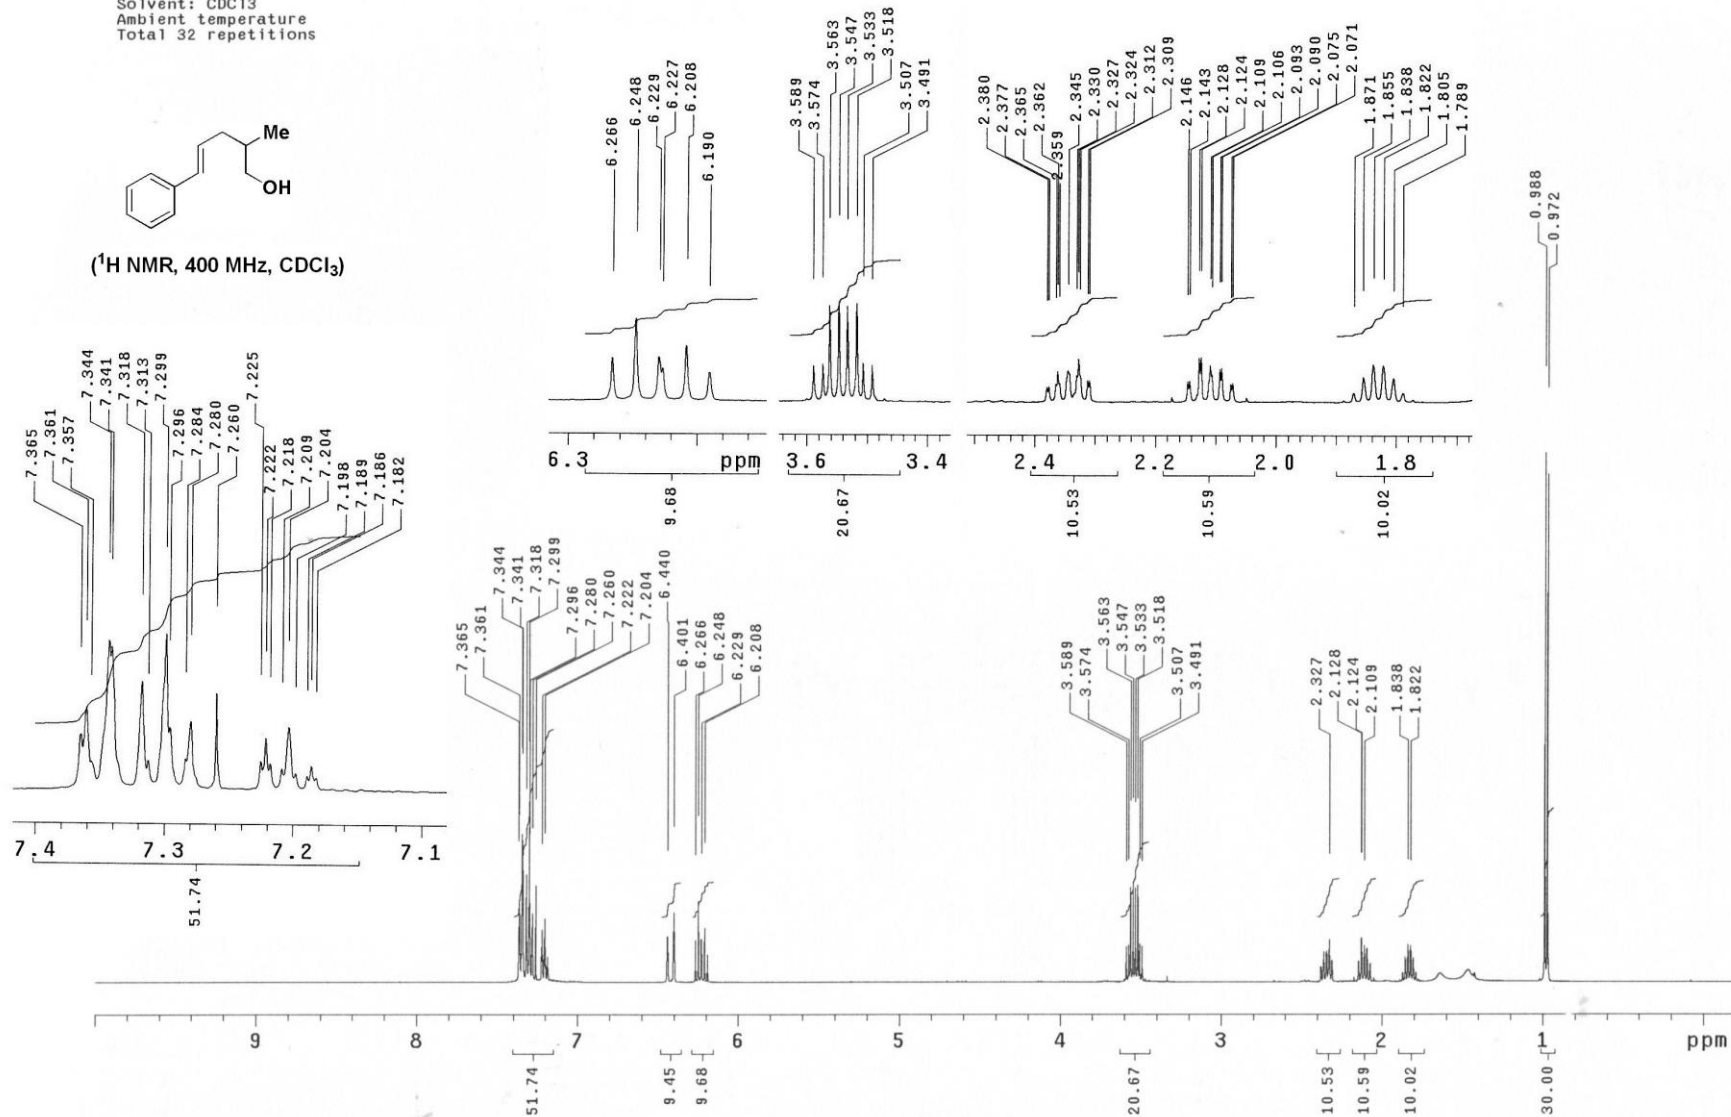

# Compound 11 (<sup>13</sup>C-NMR spectral data)

PS1030

Pulse Sequence: s2pu1

UNITYplus-400 "unity400"

Date: Oct 30 2020

Solvent: CDCl<sub>3</sub>

Ambient temperature

Total 4352 repetitions

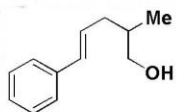

(<sup>13</sup>C NMR, 100 MHz, CDCl<sub>3</sub>)

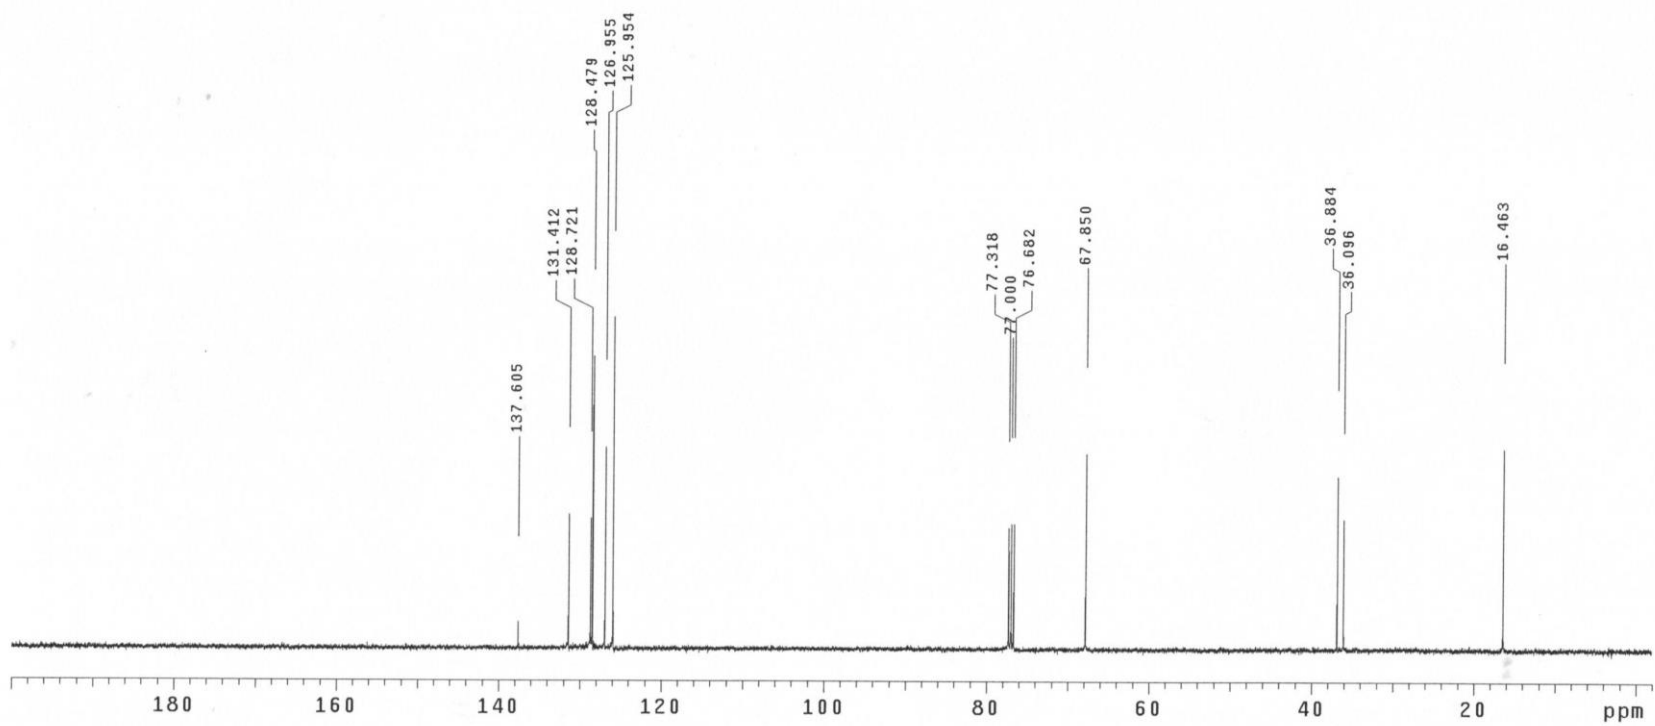

# Compound 12 (<sup>1</sup>H-NMR spectral data)

KT1090501

Pulse Sequence: s2pu1

UNITYplus-400 "unity400"

Date: May 22 2020

Solvent: CDCl<sub>3</sub>

Ambient temperature

Total 32 repetitions

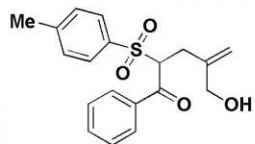

(<sup>1</sup>H NMR, 400 MHz, CDCl<sub>3</sub>)

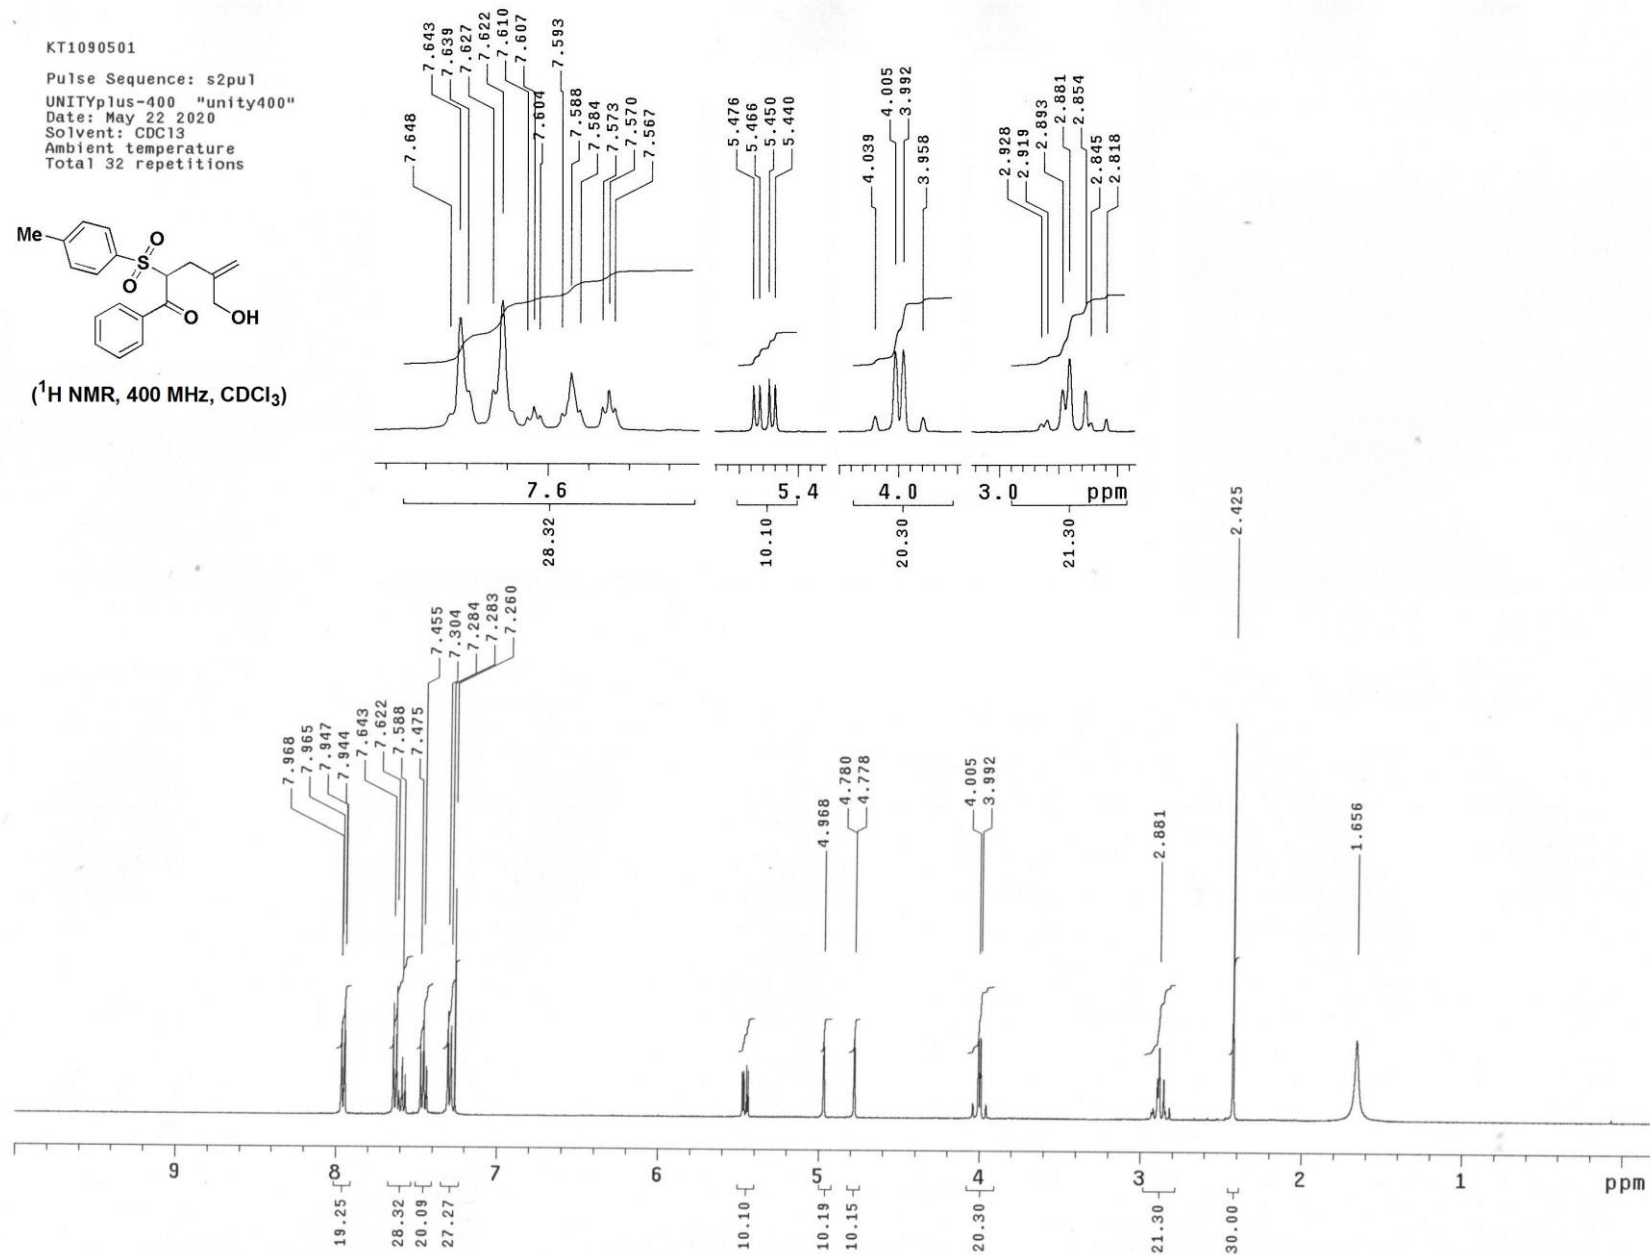

# Compound 12 (<sup>13</sup>C-NMR spectral data)

KT1090501

Pulse Sequence: s2pu1  
UNITYplus-400 "unity400"  
Date: May 22 2020  
Solvent: CDCl<sub>3</sub>  
Ambient temperature  
Total 5760 repetitions

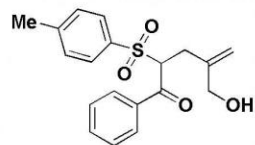

(<sup>13</sup>C NMR, 100 MHz, CDCl<sub>3</sub>)

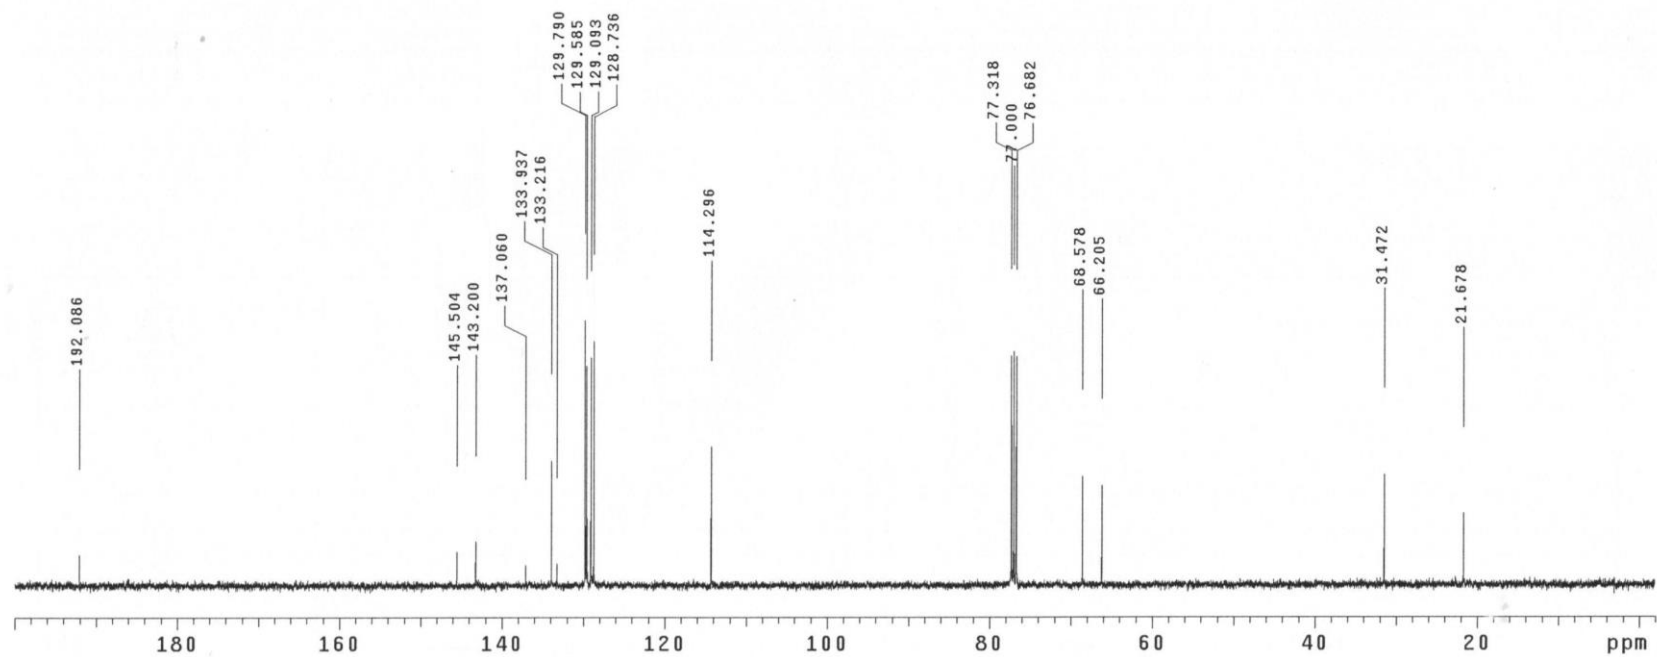

## X-ray crystal data of compound 5m

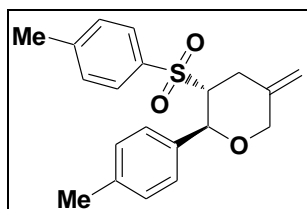

**Sample preparation** : A solution of compound **5m** (30 mg) in CH<sub>2</sub>Cl<sub>2</sub> (10 mL) was placed in a tube (10 mL). EtOAc (2 mL) was added slowly to the vial with a dropper. The vial was closed with little cotton and kept at room temperature for 2 days. Then, colorless prisms were observed.

**Crystal measurement** : X-ray crystal structures were determined with a Bruker Enraf-Nonius single-crystal diffractometer (CAD4, Kappa CCD). Thermal ellipsoids are drawn at 50% probability level.

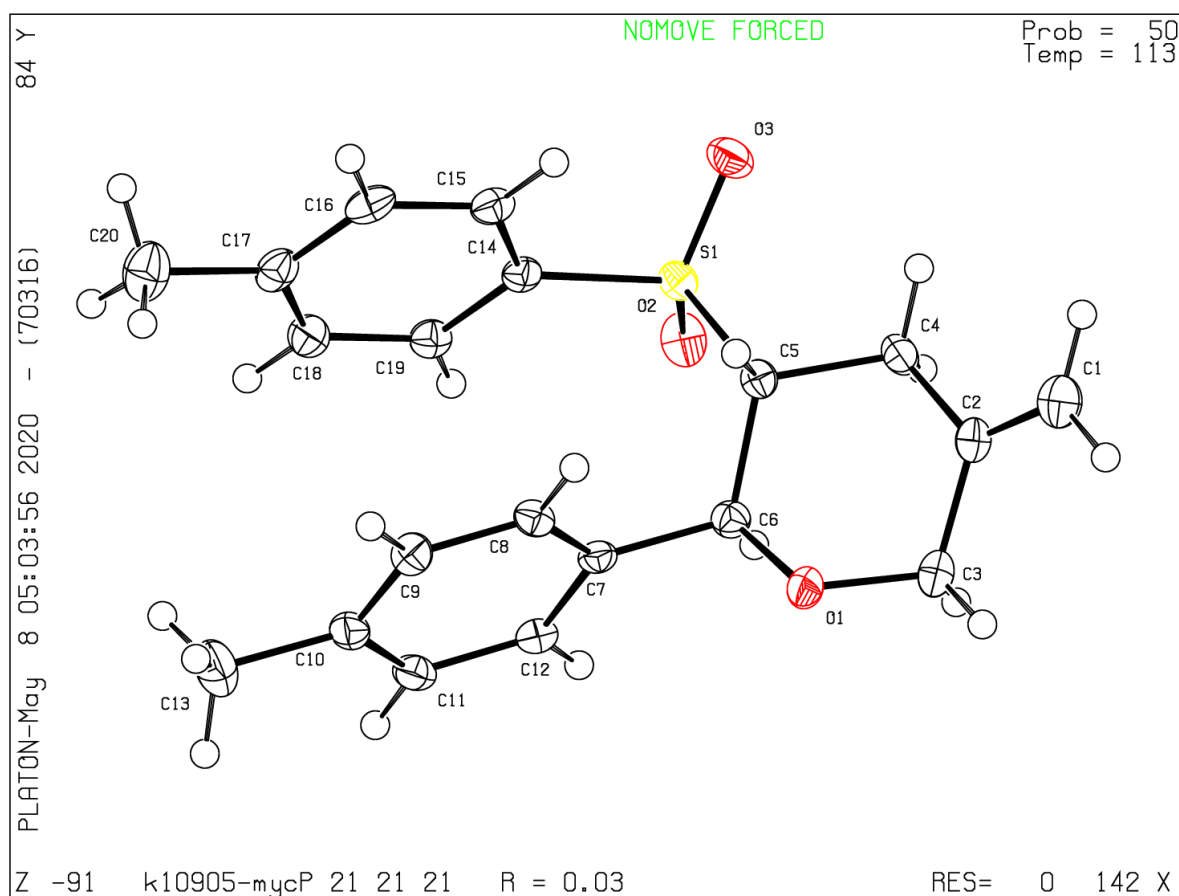

|                                   |                                                                                                     |
|-----------------------------------|-----------------------------------------------------------------------------------------------------|
| Empirical formula                 | C <sub>20</sub> H <sub>22</sub> O <sub>3</sub> S                                                    |
| Formula weight                    | 342.43                                                                                              |
| Temperature                       | 113(2) K                                                                                            |
| Wavelength                        | 0.71073 Å                                                                                           |
| Crystal system                    | Orthorhombic                                                                                        |
| Space group                       | P2 <sub>1</sub> 2 <sub>1</sub> 2 <sub>1</sub>                                                       |
| Unit cell dimensions              | a = 5.61670(10) Å      α = 90°.<br>b = 15.9231(4) Å      β = 90°.<br>c = 19.6051(4) Å      γ = 90°. |
| Volume                            | 1753.39(6) Å <sup>3</sup>                                                                           |
| Z                                 | 4                                                                                                   |
| Density (calculated)              | 1.297 Mg/m <sup>3</sup>                                                                             |
| Absorption coefficient            | 0.199 mm <sup>-1</sup>                                                                              |
| F(000)                            | 728                                                                                                 |
| Crystal size                      | 0.2 x 0.2 x 0.2 mm <sup>3</sup>                                                                     |
| Theta range for data collection   | 2.078 to 27.006°.                                                                                   |
| Index ranges                      | -6 ≤ h ≤ 7, -20 ≤ k ≤ 20, -25 ≤ l ≤ 20                                                              |
| Reflections collected             | 14002                                                                                               |
| Independent reflections           | 3611 [R(int) = 0.0344]                                                                              |
| Completeness to theta = 25.242°   | 99.9 %                                                                                              |
| Absorption correction             | Semi-empirical from equivalents                                                                     |
| Max. and min. transmission        | 1.00000 and 0.75025                                                                                 |
| Refinement method                 | Full-matrix least-squares on F <sup>2</sup>                                                         |
| Data / restraints / parameters    | 3611 / 0 / 228                                                                                      |
| Goodness-of-fit on F <sup>2</sup> | 1.024                                                                                               |
| Final R indices [I > 2σ(I)]       | R1 = 0.0320, wR2 = 0.0711                                                                           |
| R indices (all data)              | R1 = 0.0354, wR2 = 0.0727                                                                           |
| Absolute structure parameter      | 0.03(3)                                                                                             |
| Extinction coefficient            | 0.0039(11)                                                                                          |
| Largest diff. peak and hole       | 0.258 and -0.287 e.Å <sup>-3</sup>                                                                  |

## X-ray crystal data of compound 5n

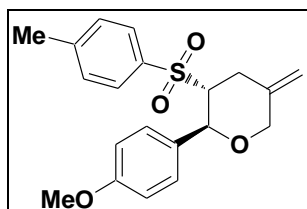

**Sample preparation** : A solution of compound **5n** (30 mg) in CH<sub>2</sub>Cl<sub>2</sub> (10 mL) was placed in a tube (10 mL). EtOAc (2 mL) was added slowly to the vial with a dropper. The vial was closed with little cotton and kept at room temperature for 2 days. Then, colorless prisms were observed.

**Crystal measurement** : X-ray crystal structures were determined with a Bruker Enraf-Nonius single-crystal diffractometer (CAD4, Kappa CCD). Thermal ellipsoids are drawn at 50% probability level.

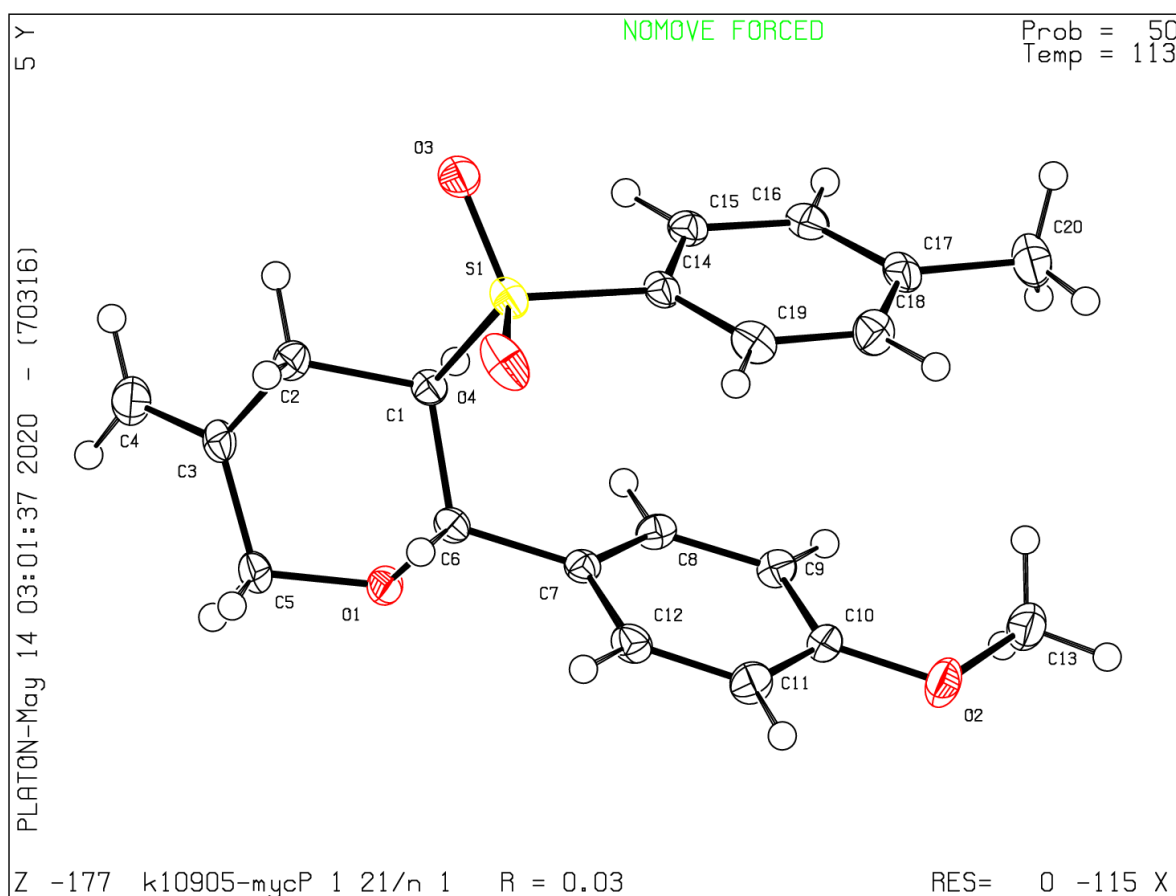



|                                             |                                                               |
|---------------------------------------------|---------------------------------------------------------------|
| Empirical formula                           | C <sub>20</sub> H <sub>22</sub> O <sub>4</sub> S              |
| Formula weight                              | 358.43                                                        |
| Temperature/K                               | 113(2)                                                        |
| Crystal system                              | monoclinic                                                    |
| Space group                                 | P2 <sub>1</sub> /n                                            |
| a/Å                                         | 12.4097(3)                                                    |
| b/Å                                         | 9.8815(2)                                                     |
| c/Å                                         | 14.6434(3)                                                    |
| α/°                                         | 90                                                            |
| β/°                                         | 98.892(2)                                                     |
| γ/°                                         | 90                                                            |
| Volume/Å <sup>3</sup>                       | 1774.09(7)                                                    |
| Z                                           | 4                                                             |
| ρ <sub>calc</sub> /cm <sup>3</sup>          | 1.342                                                         |
| μ/mm <sup>-1</sup>                          | 0.204                                                         |
| F(000)                                      | 760.0                                                         |
| Crystal size/mm <sup>3</sup>                | 0.2 × 0.2 × 0.2                                               |
| Radiation                                   | Mo Kα (λ = 0.71073)                                           |
| 2θ range for data collection/°              | 4.008 to 54.124                                               |
| Index ranges                                | -15 ≤ h ≤ 15, -12 ≤ k ≤ 7, -18 ≤ l ≤ 18                       |
| Reflections collected                       | 20613                                                         |
| Independent reflections                     | 3723 [R <sub>int</sub> = 0.0273, R <sub>sigma</sub> = 0.0235] |
| Data/restraints/parameters                  | 3723/0/229                                                    |
| Goodness-of-fit on F <sup>2</sup>           | 1.076                                                         |
| Final R indexes [I ≥ 2σ (I)]                | R <sub>1</sub> = 0.0334, wR <sub>2</sub> = 0.0860             |
| Final R indexes [all data]                  | R <sub>1</sub> = 0.0395, wR <sub>2</sub> = 0.0890             |
| Largest diff. peak/hole / e Å <sup>-3</sup> | 0.32/-0.36                                                    |
